# Supplementary material for: Food insecurity and maternal–child nutritional status in Mexico: cross-sectional analysis of the National Health and Nutrition Survey 2012
Source: PubMed Central journal article supplement — BMJ Open. 2017 Jul 31;7(7):e014371. doi: 10.1136/bmjopen-2016-014371 (PMC5642771; doi:10.1136/bmjopen-2016-014371), 2017-07-31
Supplement: bmjopen-2016-014371.draft_revisions.pdf [file bmjopen-2016-014371.draft_revisions.pdf]

# BMJ Open

## Food insecurity and the nutritional status of Mexican mother-child pairs

|                                 |                                                                                                                                                                                                                                                                                                                                                                                                                                                                                |
|---------------------------------|--------------------------------------------------------------------------------------------------------------------------------------------------------------------------------------------------------------------------------------------------------------------------------------------------------------------------------------------------------------------------------------------------------------------------------------------------------------------------------|
| Journal:                        | <i>BMJ Open</i>                                                                                                                                                                                                                                                                                                                                                                                                                                                                |
| Manuscript ID                   | bmjopen-2016-014371                                                                                                                                                                                                                                                                                                                                                                                                                                                            |
| Article Type:                   | Research                                                                                                                                                                                                                                                                                                                                                                                                                                                                       |
| Date Submitted by the Author:   | 28-Sep-2016                                                                                                                                                                                                                                                                                                                                                                                                                                                                    |
| Complete List of Authors:       | Shamah- Levy, Teresa; Instituto Nacional de Salud Publica, Nutrition Monitoring<br>Mundo-Rosas, Verónica ; Instituto Nacional de Salud Publica, Nutrition Monitoring<br>Morales-Ruan, Carmen; Instituto Nacional de Salud Publica, Nutrition Monitoring<br>Cuevas-Nasu, Lucia; Instituto Nacional de Salud Publica, Nutrition Monitoring<br>Méndez-Gómez-Humarán, Ignacio; Center for Research in Mathematics (CIMAT)<br>Pérez-Escamilla, Rafael; Yale School of Public Health |
| <b>Primary Subject Heading</b>: | Public health                                                                                                                                                                                                                                                                                                                                                                                                                                                                  |
| Secondary Subject Heading:      | Epidemiology, Health policy                                                                                                                                                                                                                                                                                                                                                                                                                                                    |
| Keywords:                       | NUTRITION & DIETETICS, PUBLIC HEALTH, EPIDEMIOLOGY                                                                                                                                                                                                                                                                                                                                                                                                                             |
|                                 |                                                                                                                                                                                                                                                                                                                                                                                                                                                                                |

SCHOLARONE™  
Manuscripts

only

1  
2  
3  
4  
5  
6 Food insecurity and the nutritional status of Mexican mother-child pairs

7  
8 Teresa Shamah-Levy<sup>1\*</sup> ([tshamah@insp.mx](mailto:tshamah@insp.mx)), Verónica Mundo-Rosas<sup>1</sup>  
9 ([vmundo@insp.mx](mailto:vmundo@insp.mx)), Carmen Morales-Ruan<sup>1</sup> ([cmruan@insp.mx](mailto:cmruan@insp.mx)), Lucia Cuevas-  
10 Nasu<sup>1</sup> ([lcuevas@insp.mx](mailto:lcuevas@insp.mx)), Ignacio Méndez Gómez –Humarán<sup>2</sup>  
11 ([imendez@cimat.mx](mailto:imendez@cimat.mx)), Rafael Pérez-Escamilla<sup>3</sup> ([rafael.perez-escamilla@yale.edu](mailto:rafael.perez-escamilla@yale.edu))  
12  
13

14 1 Center for Research in Nutrition and Health. National Public Institute,  
15 Mexico.

16 2 Center for Research in Mathematics (CIMAT), Aguascalientes,  
17 Aguascalientes, Mexico.

18 3 Yale School of Public Health, New Haven, Connecticut, USA.  
19  
20

21 \*Correspondence should be addressed to Dr. Teresa Shamah-Levy. Research  
22 Center on Nutrition and Health, National Institute of Public Health (INSP). Av.  
23 Universidad No 655, Col. Sta. Ma. Ahuacatlán, C.P. 62100, Cuernavaca, Morelos,  
24 México.  
25

26 Telephone/Fax number +52 (777) 3113787. E-mail: [tshaman@insp.mx](mailto:tshaman@insp.mx)  
27  
28  
29

30 WORD COUNT: 2899 ;

31  
32 NUMBER OF FIGURES:1;

33  
34  
35 NUMBER OF TABLES: 4  
36  
37  
38  
39  
40  
41  
42  
43  
44  
45  
46  
47  
48  
49  
50  
51  
52  
53  
54  
55  
56  
57  
58  
59  
60

## Abstract

**Background.** Household Food Insecurity (HFI) has been associated with overweight mothers and underweight children living in the same households. Adult obesity has been linked to both obesity and undernutrition in children. **Objective.** The purpose of this article was, to examine the association between HFI and child stunting risk and to determine if maternal-child overweight/obesity modifies the relationship between HFI and stunting risk. **Methods.** We assessed the association of HFI with the nutritional status of mothers and their <11-year-old children based on data from the Mexican National Health and Nutrition Survey in (ENSANUT 2012). The study included 5,087 mother-preschool child pairs and 7,181 mother-school aged child pairs. HFI was measured with the Latin American and Caribbean Food Security Scale (ELCSA). A multiple logistic regressions were used to examine the associations of interest adjusting for pertinent covariates. **Results.** There was a higher prevalence of stunting among preschool children with moderate HFI (16.2%) or severe (16.8%) ( $p=0.036$  and  $p=0.007$ , respectively), compared with mild or no HFI (13.2 and 10.7%). A significant interaction was found between maternal obesity status and HFI on stunting among preschoolers ( $p<0.05$ ). Specifically, HFI severity increased the risk of child stunting among non-obese mothers but not among obese mothers. Among school aged children. **Conclusion.** A novel interaction between HFI and maternal obesity status on child stunting risk was uncovered. However this was not the case if their mothers were obese. Food security government policies and programs need to take into account these complex relationships in the context of an advanced nutrition transition.

**Keywords.** Food insecurity; obesity, under nutrition; nutrition survey; nutrition transition; Mexico

### Strengths and limitations of this study

- Our study, its cross-sectional design restricts the drawing of causal inferences. Additionally, our findings refer specifically to Mexican children and adolescents and similar population but cannot be generalized to other population groups.
- Our findings contribute to the limited research available on the relationship between HFI and the nutritional status of mother-child pairs.
- This is one of the first studies in this area dealing specifically with the Mexican population.
- The large sample size of our study constitutes another strength which allowed us to introduce possible confounders in the statistical models.
- We found an important phenomenon of the nutritional transition in our country that is common in other countries of the world: the double burden of malnutrition that occurs in the same food insecure household that may be a shared mechanism for dual forms of malnutrition within the same individual.
- Our study documented an unusual interaction between HFI and maternal obesity status on child with risk of stunting. We believe these findings are a useful for improving nutrition guidelines that policies and programs need to be taken into account in the context of an advanced nutritional transition.

## Introduction

Food security “exists when all people, at all times, have physical, social and economic access to sufficient, safe and nutritious food which meets their dietary needs and food preferences for an active and healthy life, and is supported by an environment of adequate sanitation, health services and care. [1, 2]

The term hunger, which describes a feeling of discomfort from not eating, has also been used to describe undernutrition, especially in relation to food insecurity [3]. Experience-based indices can be used to assess hunger directly at the household level [4].

Household Food Insecurity (HFI) has been defined as “limited or uncertain availability of nutritionally adequate and safe food or limited and uncertain ability to acquire adequate food in socially acceptable ways” [5]

Maternal and child undernutrition is highly prevalent in low- and middle-income countries, causing accounting for a substantial proportion of mortality and overall disease burden. Stunting, severe wasting, and intrauterine growth restriction, together, have been linked to 2.2 million deaths and to 21% of disability-adjusted life-years (DALYs) in children younger than five years [6].

Previous studies have suggested a link between obesity and HFI [7]; especially among adult women [8-10]. Specifically, it has been documented that women who experience food insecurity are more likely to be obese compared with food secure

1  
2  
3  
4  
5 women [11]; and those most affected by HFI include members of racial/ethnic  
6 minority groups and low-income households [12].  
7  
8

9  
10  
11 A possible explanation for the “paradoxical” link between HFI, low income and  
12 obesity lies in the fact that high-fat, high-calorie food products cost less than  
13 healthful foods [13] and these energy dense foods have been identified as risk  
14 factors for child and adult obesity [14]. Moreover, HFI may lead to disorderly eating  
15 patterns characterized by bingeing for consuming little food, according to the  
16 availability of supplies negatively affecting the body’s metabolism [15].  
17  
18  
19  
20  
21  
22  
23  
24  
25

26 Food insecurity in Mexico has evolved in complex and contrasting contexts where  
27 undernutrition and overweight/obesity coexist as part of the advanced nutrition  
28 transition the country is immersed in the context of widespread HFI. According to  
29 the most recent Mexican National Health and Nutrition Survey (ENSANUT 2012)  
30 nearly one out of three households suffers from moderate or severe HFI [16].  
31  
32  
33  
34  
35  
36  
37  
38

39 The last decades have witnessed alarming increases in the prevalence of  
40 overweight/obesity among Mexican children: from 7.8% in 1988 to 9.7% in 2012 for  
41 children under five; from 26.9% in 1999 to 34.4% in 2012 for 5-11-year olds; and  
42 from 11.1% in 1988 to 35.8% in 2012 for female adolescents aged 12-19 years. In  
43 the adult population aged 20 and older, this prevalence jumped from 61.8% to  
44 71.3% in twelve years [17].  
45  
46  
47  
48  
49  
50  
51  
52

53 In 2012, children under five living in severely food insecure households had a 42%  
54 higher risk of stunting or chronic malnutrition compared with their counterparts  
55  
56  
57  
58  
59  
60

1  
2  
3  
4  
5 living in food secure households [18]. In the same year, the mean BMI of women  
6  
7  
8 aged 20 to 59 was 28.9, women living with mild HFI had a mean BMI of 28.3,  
9  
10 compared with 29.3 and 29.4 among those living in households with moderate and  
11  
12 severe food insecurity ( $p < 0.001$ ,  $p = 0.011$  and  $p = 0.007$ , respectively) [10].  
13  
14

15  
16 The double burden of malnutrition can occur not only within the same country, city  
17  
18 or household (mother-child pairs), but also in the same individual at different  
19  
20 stages of his or her life [19]. The purpose of this article was, to examine the  
21  
22 association between HFI and child stunting risk and to determine if maternal-child  
23  
24 overweight/obesity modifies the relationship between HFI and stunting risk.  
25  
26  
27

## 28 **Methods**

### 29 ***Study design and population***

30  
31  
32 Data were drawn from ENSANUT 2012, a cross-sectional, probabilistic and cluster  
33  
34 survey with national, regional, urban-rural and state-level representativeness.  
35  
36 Oversampling was directed to Mexican households of lower socioeconomic status.  
37  
38 A sample of 50,528 household of an estimated 29,429,252 households nationwide  
39  
40 was obtained between October 2011 and May 2012. Details of sample size and  
41  
42 design have been described elsewhere [20].  
43  
44  
45  
46  
47  
48

49  
50 A total of 5,087 preschoolers (1-4y), 8,401 schooler children (5-11y) and 9,581  
51  
52 mothers were included in the survey. A total of 5087pairs of mothers/ preschoolers  
53  
54 were included, all mothers in this sample had only one child. A total of 7,181  
55  
56  
57  
58  
59  
60

1  
2  
3  
4  
5 mothers/schooler were included, 2,432 mothers had more than one schooler and  
6  
7  
8 2,677 mothers had both a preschooler and schooler(s).  
9

10  
11 Our analytical sample included 5,087 mother-preschooler pairs and 7,181 mother-  
12  
13 schooler pairs with complete data. When mothers had more than one school-aged  
14  
15 child that met the study criteria, all the children were included in the analyses.  
16  
17

18  
19 Informed consent was obtained from all respondents – or their parents/guardians in  
20  
21 the case of children under 7 years – prior to their participation in the study. The  
22  
23 survey protocol was approved by the Ethics Committee of the National Institute of  
24  
25 Public Health, Mexico.  
26  
27

## 28 29 **Variables and Data sources/ measurement**

### 30 31 ***HFI measurement***

32  
33 Perceived HFI was measured with a version of the Escala Latinoamericana y  
34  
35 Caribeña de Seguridad Alimentaria (ELCSA) previously validated in Mexico [21].  
36  
37 ELCSA included 15 questions targeting the head of the family or the woman in  
38  
39 charge of preparing meals. Eight questions referred directly to HFI in the  
40  
41 household or the adults within the household; the remaining seven referred to HFI  
42  
43 in minors (<18y). HFI was categorized as mild, moderate or severe using  
44  
45 recommended cut-off points. The reference time frame was three months prior to  
46  
47 survey administration.  
48  
49  
50  
51  
52  
53

### 54 55 ***Anthropometric measurements***



1  
2  
3  
4  
5  
6 Weight and recumbent length measures were obtained from children under two,  
7  
8 and standing height measures from children aged two to under five following  
9  
10 standard recommended procedures [22, 23].  
11

12  
13 The anthropometric measures, together with the age, and sex of the children were  
14  
15 used to calculate the weight-for-age, height-for-age, and weight-for-height z-scores  
16  
17 using the WHO growth standards.  
18  
19

20  
21 The prevalence of undernutrition in its different manifestations (underweight,  
22  
23 wasting and stunting) was calculated using the  $<-2$  z-score cut-off point [24].  
24  
25

26  
27 Overweight and obesity were determined according to the WHO Growth Reference  
28  
29 charts [25], with BMI ( $\text{kg}/\text{m}^2$ ) z-scores adjusted for age, values between -5.0 and  
30  
31 +5.0 were considered as values outside this range were considered to be  
32  
33 implausible. There were no implausible values for BMI z-score in children. For  
34  
35 adults, the WHO standard BMI cut-off point was used to classify mothers into one  
36  
37 of the following categories: underweight ( $<18.5 \text{ kg}/\text{m}^2$ ), normal weight (18.5 to 24.9  
38  
39  $\text{kg}/\text{m}^2$ ), overweight (25-29.9  $\text{kg}/\text{m}^2$ ) and obese ( $\geq 30 \text{ kg}/\text{m}^2$ ) [26]. For adults, only  
40  
41 BMI values between 10 and 58 were to be considered, but there were also no  
42  
43 implausible values for BMI in adults.  
44  
45  
46  
47  
48

### 49 **Covariates**

50  
51  
52 The following covariates, described below, were included in the statistical  
53  
54 analyses: sex of the child, residence location (urban/rural), region of residence  
55  
56 (northern, central, Mexico City, and southern); and maternal education: none,  
57  
58  
59  
60

1  
2  
3  
4  
5 primary, secondary, senior high school (“preparatoria” according to its Spanish  
6 translation) and university (bachelor’s degree and beyond). We also included food  
7 assistance program participation as a covariate.  
8  
9  
10  
11

### 12 13 ***Socioeconomic Index*** 14

15  
16 We used a standard socioeconomic status (SES) index developed in Mexico based  
17 on a variety of household characteristics: type of floor, wall and ceiling materials;  
18 the ratio of number of rooms used for sleeping to number of persons residing in the  
19 household; basic service infrastructure including water source and water disposal;  
20 and possession of domestic appliances such as a refrigerator, washing machine,  
21 microwave oven, stove, boiler, radio, television, cable television signal, telephone  
22 and computer. This SES index was selected to facilitate comparison with previous  
23 surveys in Mexico [21].  
24  
25  
26  
27  
28  
29  
30  
31  
32  
33  
34

### 35 36 ***Ethical considerations*** 37

38  
39 All study procedures involving human participants were approved by the Ethics  
40 Committee of the National Institute of Public Health in Mexico. Written informed  
41 consent was obtained from all survey participants with parents serving as proxies  
42 of minors under 7 years.  
43  
44  
45  
46  
47  
48  
49  
50  
51  
52  
53  
54  
55  
56  
57  
58  
59  
60

## **Statistical methods**

We calculated the prevalence (95% CI) of each HFI category by socioeconomic characteristic and maternal-child nutritional status. We then conducted logistic regression models for examining stunting and overweight among preschool children and for stunting, overweight/obesity among school-aged children, adjusting for pertinent covariates; taking into account the complex sampling design using the STATA 13 SVY module for complex surveys. The cluster effect at the mother level for mothers with more than one schooler was tested and it was non-significant, thus it was not adjusted for in the analyses. There were no mothers with more than one preschooler. Results were expressed as Adjusted Odds Ratios (AORs) with their corresponding 95% confidence intervals (95% CI).

## **Results**

Our analytical sample included 5,087 mother-preschooler pairs and 7,181 mother-schooler pairs with complete data.

In the mother-preschooler pairs, moderate HFI was significantly more prevalent among those residing in the southern, as opposed to the northern or central regions of Mexico. As expected, severe HFI was five and six times more prevalent in the low and very low quintiles, respectively, than in the top quintile. Moderate and severe HFI were more prevalent in households where mothers had not studied beyond junior high school and also among those benefiting from government food-assistance programs (Table 1).

1  
2  
3  
4  
5  
6  
7  
8 Similarly, in the mother-schoolers pairs, HFI in general was most prevalent among  
9 those living in southern Mexico and lower in the north of the country; HFI was  
10 higher in the low and very low socioeconomic quintiles. Moderate and severe HFI  
11 were significantly more prevalent among the pairs where mothers had not studied  
12 beyond junior high school, benefited from government food-support programs and  
13 belonged to indigenous population groups (Table 1).  
14  
15  
16  
17  
18  
19  
20  
21  
22  
23  
24  
25  
26  
27  
28  
29  
30  
31  
32  
33  
34  
35  
36  
37  
38  
39  
40  
41  
42  
43  
44  
45  
46  
47  
48  
49  
50  
51  
52  
53  
54  
55  
56  
57  
58  
59  
60

**Table 1. Food insecurity level according to the socio-demographic characteristics of the mother-preschooler and mother scholar pairs**

|                                                  | Total |                  | Food Insecurity Level in preschooler |              |      |             |          |             |        |             |
|--------------------------------------------------|-------|------------------|--------------------------------------|--------------|------|-------------|----------|-------------|--------|-------------|
|                                                  |       |                  | Secure                               |              | Mild |             | Moderate |             | Severe |             |
|                                                  | n     | N<br>(thousands) | %                                    | 95% IC       | %    | 95% IC      | %        | 95% IC      | %      | 95% IC      |
| <b>Child sex</b>                                 |       |                  |                                      |              |      |             |          |             |        |             |
| Female                                           | 2539  | 1452.9           | 24.2                                 | (21.7,26.79) | 43.8 | (40.9,46.6) | 21.6     | (19.5,23.8) | 10.5   | (9.0,12.2)  |
| Male                                             | 2548  | 1522.1           | 24.7                                 | (22.3,27.13) | 45.0 | (42.4,47.7) | 18.4     | (16.5,20.6) | 11.9   | (10.3,13.8) |
| <b>Residence location</b>                        |       |                  |                                      |              |      |             |          |             |        |             |
| Urban                                            | 3142  | 2123.0           | 26.8                                 | (24.6 ,29.1) | 43.3 | (40.9,45.8) | 18.9     | (17.1,20.9) | 10.9   | (9.4,12.6)  |
| Rural                                            | 1945  | 851.9            | 18.5                                 | (16.3,20.9)  | 47.0 | (43.8,50.2) | 22.4     | (20.1,25.0) | 12.0   | (10.3,14.1) |
| <b>Region</b>                                    |       |                  |                                      |              |      |             |          |             |        |             |
| Northern                                         | 1083  | 524.5            | 30.5                                 | (27.2,34.0)  | 42.5 | (38.9,46.2) | 15.8     | (13.3,18.6) | 11.2   | (9.2,13.5)  |
| Central                                          | 1804  | 941.8            | 26.7                                 | (24.0,29.6)  | 45.3 | (42.2,48.4) | 17.4     | (15.1,20.0) | 10.6   | (8.8,12.6)  |
| Mexico City                                      | 200   | 426.5            | 22.1                                 | (15.6,30.4)  | 45.5 | (37.9,53.4) | 21.9     | (16.3,28.8) | 10.5   | (6.3,16.9)  |
| Southern                                         | 2000  | 1082.2           | 20.4                                 | (18.1,22.8)  | 44.1 | (41.1,47.1) | 23.4     | (21.2,25.9) | 12.1   | (10.3,14.2) |
| <b>Wealth</b>                                    |       |                  |                                      |              |      |             |          |             |        |             |
| Very Low (Q1)                                    | 1319  | 666.0            | 12.4                                 | (9.9,15.4)   | 45.8 | (41.9,49.6) | 23.8     | (20.8,27.1) | 18.0   | (15.1,21.4) |
| Low (Q2)                                         | 1187  | 629.8            | 17.6                                 | (15.0,20.6)  | 43.4 | (39.3,47.7) | 25.1     | (21.5,29.2) | 13.8   | (11.2,16.9) |
| Medium (Q3)                                      | 1028  | 584.5            | 20.0                                 | (17.1,23.4)  | 48.4 | (44.8,52.1) | 20.3     | (17.3,23.8) | 11.1   | (8.7,14.2)  |
| High (Q4)                                        | 879   | 575.7            | 29.1                                 | (25.1,33.5)  | 44.2 | (39.7,48.7) | 18.5     | (15.1,22.4) | 8.2    | (6.2,10.8)  |
| Very High (Q5)                                   | 674   | 519.0            | 47.7                                 | (42.3,53.2)  | 39.5 | (34.4,44.7) | 10.0     | (7.2,13.6)  | 2.8    | (1.8,4.6)   |
| <b>Maternal Education</b>                        |       |                  |                                      |              |      |             |          |             |        |             |
| None                                             | 349   | 196.4            | 10.0                                 | (6.8,14.4)   | 40.6 | (34.2,47.4) | 24.7     | (19.4,30.9) | 24.7   | (18.9,31.5) |
| Primary and/or secondary school                  | 3568  | 1951.6           | 19.1                                 | (17.4,20.9)  | 46.1 | (43.7,48.5) | 21.5     | (19.6,23.6) | 13.3   | (11.8,15.1) |
| Beyond secondary school                          | 1165  | 823.0            | 40.4                                 | (36.4,44.6)  | 41.4 | (37.6,45.3) | 15.1     | (12.5,18.1) | 3.0    | (2.0,4.6)   |
| <b>Beneficiaries of Food Assistance Programs</b> |       |                  |                                      |              |      |             |          |             |        |             |
| Beneficiaries                                    | 2246  | 1187.1           | 15.7                                 | (13.6,18.1)  | 45.8 | (42.7,48.8) | 24.5     | (22.1,27.1) | 14.0   | (12.0,16.3) |
| Non-beneficiaries                                | 2400  | 1520.1           | 30.2                                 | (27.6,33.0)  | 43.8 | (41.1,46.6) | 16.9     | (14.9,19.1) | 9.0    | (7.6,10.8)  |
| <b>Indigenous</b>                                |       |                  |                                      |              |      |             |          |             |        |             |
| Yes                                              | 101   | 1150.9           | 20.3                                 | (11.7,32.8)  | 38.3 | (27.8,50.1) | 29.5     | (20.1,40.9) | 12.0   | (6.4,21.2)  |
| No                                               | 1906  | 41.9             | 23.5                                 | (21.2,25.9)  | 44.1 | (41.2,47.1) | 20.3     | (18.0,22.9) | 12.0   | (9.9,14.3)  |
| <b>Food Insecurity Level in scholar</b>          |       |                  |                                      |              |      |             |          |             |        |             |
|                                                  | Total |                  | Secure                               |              | Mild |             | Moderate |             | Severe |             |

|                                                  | n    | N<br>(thousands) | %    | 95% IC      |
|--------------------------------------------------|------|------------------|------|-------------|------|-------------|------|-------------|------|-------------|
| <b>Child sex</b>                                 |      |                  |      |             |      |             |      |             |      |             |
| Female                                           | 4269 | 2413.0           | 23.1 | (21.3,25.1) | 42.3 | (40.4,44.3) | 20.1 | (18.4,22.0) | 14.4 | (12.9,15.9) |
| Male                                             | 4132 | 2337.1           | 24.0 | (21.9,26.2) | 43.6 | (41.3,45.9) | 19.8 | (18.1,21.6) | 12.6 | (11.1,14.2) |
| <b>Residence location</b>                        |      |                  |      |             |      |             |      |             |      |             |
| Urban                                            | 5267 | 3444.7           | 26.2 | (24.3,28.1) | 42.0 | (39.9,43.9) | 18.4 | (16.8,20.1) | 13.5 | (12.1,15.1) |
| Rural                                            | 3134 | 1306.3           | 16.7 | (14.8,18.8) | 45.8 | (43.2,48.3) | 24.2 | (22.1,26.4) | 13.4 | (11.8,15.3) |
| <b>Region</b>                                    |      |                  |      |             |      |             |      |             |      |             |
| Northern                                         | 1796 | 884.6            | 29.5 | (26.4,32.8) | 42.3 | (39.2,45.4) | 16.2 | (13.9,18.8) | 12.0 | (10.2,14.2) |
| Central                                          | 2928 | 1446.1           | 25.8 | (23.2,28.5) | 45.1 | (42.3,47.9) | 16.8 | (14.8,19.0) | 12.3 | (10.6,14.2) |
| Mexico City                                      | 353  | 717.3            | 25.6 | (20.4,31.7) | 36.2 | (30.4,42.4) | 21.6 | (16.7,27.5) | 16.6 | (12.0,22.3) |
| Southern                                         | 3324 | 1738.9           | 18.0 | (16.2,19.9) | 44.2 | (42.1,46.5) | 23.8 | (21.8,25.9) | 14.0 | (12.4,15.7) |
| <b>Wealth</b>                                    |      |                  |      |             |      |             |      |             |      |             |
| Very Low (Q1)                                    | 1977 | 980.7            | 9.6  | (7.9,11.6)  | 42.5 | (39.1,46.1) | 26.2 | (23.3,29.4) | 21.7 | (18.7,25.1) |
| Low (Q2)                                         | 1874 | 947.06           | 15.0 | (12.9,17.5) | 39.6 | (36.3,42.9) | 25.5 | (22.4,28.9) | 19.9 | (17.1,22.9) |
| Medium (Q3)                                      | 1717 | 914.6            | 16.0 | (13.6,18.7) | 50.5 | (46.8,54.2) | 19.7 | (17.1,22.6) | 13.9 | (11.5,16.6) |
| High (Q4)                                        | 1583 | 995.9            | 29.8 | (26.4,33.4) | 43.8 | (40.4,47.2) | 17.4 | (14.7,20.5) | 9.05 | (7.3,11.1)  |
| Very High (Q5)                                   | 1250 | 912.7            | 48.2 | (43.8,52.7) | 38.5 | (34.7,42.4) | 10.7 | (8.0,14.1)  | 2.6  | (1.6,4.4)   |
| <b>Maternal Education</b>                        |      |                  |      |             |      |             |      |             |      |             |
| None                                             | 651  | 339.1            | 13.4 | (10.0,17.7) | 40.9 | (35.8,46.2) | 21.6 | (17.6,26.1) | 24.1 | (19.5,29.5) |
| Primary and/or secondary school                  | 5970 | 3212.5           | 18.7 | (17.2,20.3) | 44.0 | (41.9,45.9) | 22.0 | (20.4,23.7) | 15.4 | (13.9,16.9) |
| Beyond secondary school                          | 1780 | 1199.4           | 39.5 | (35.9,43.1) | 41.0 | (37.8,44.4) | 14.1 | (11.8,16.8) | 5.4  | (4.2,6.9)   |
| <b>Beneficiaries of Food Assistance Programs</b> |      |                  |      |             |      |             |      |             |      |             |
| Beneficiaries                                    | 4527 | 2362.1           | 16.5 | (14.9,18.2) | 44.9 | (42.5,47.3) | 22.2 | (20.5,24.1) | 16.4 | (14.6,18.4) |
| Non-beneficiaries                                | 3299 | 2032.0           | 30.8 | (28.2,33.4) | 41.6 | (39.1,44.1) | 17.4 | (15.4,19.6) | 10.2 | (8.8,11.9)  |
| <b>Indigenous</b>                                |      |                  |      |             |      |             |      |             |      |             |
| Yes                                              | 595  | 228.1            | 10.8 | (8.0,14.3)  | 44.4 | (39.2,49.8) | 26.1 | (21.8,30.9) | 18.7 | (14.7,23.5) |
| No                                               | 7806 | 4522.9           | 24.2 | (22.7,25.8) | 42.9 | (41.2,44.5) | 19.7 | (18.3,21.1) | 13.2 | (12.1,14.5) |

1  
2  
3  
4  
5  
6  
7  
8  
9  
10  
11  
12  
13  
14  
15  
16  
17  
18  
19  
20  
21  
22  
23  
24  
25  
26  
27  
28  
29  
30  
31  
32  
33  
34  
35  
36  
37  
38  
39  
40  
41  
42  
43  
44  
45  
46  
47  
48  
49  
50  
51  
52  
53  
54  
55  
56  
57  
58  
59  
60

Table 2 describes the nutritional status of the population by household food security/insecurity level. Stunting in preschoolers was more prevalent in households with severe/moderate HFI (over 16% respectively) than in households with mild (13.2%) or no HFI (10.7%). Likewise, wasting was more prevalent in households with severe (3.7%) than in those with mild (1.7%) or moderate (1.9%) HFI or living in food secure households (2.2%).

In preschool children, there were no significant differences in overweight prevalence by HFI level.

While the prevalence of stunting among school-aged children was 10% in households with severe HFI, overweight and obesity were much more prevalent in households with food security (40%) compared with households with mild (34.5%), moderate (32.1%) or severe (28.6%) HFI. The prevalence of maternal obesity was high regardless of HFI status: >70% overall, reaching 77% in mild food insecure households.

Table 2. Prevalence of nutritional status by level of food insecurity

| Nutritional status     | Food Security |      |             | Food Insecurity in Preschool-Age Children |      |             |               |      |             |               |             |             |
|------------------------|---------------|------|-------------|-------------------------------------------|------|-------------|---------------|------|-------------|---------------|-------------|-------------|
|                        |               |      |             | Mild                                      |      |             | Moderate      |      |             | Severe        |             |             |
|                        | N (thousands) | %    | (95% IC)    | N (thousands)                             | %    | (95% IC)    | N (thousands) | %    | (95% IC)    | N (thousands) | %           | (95% IC)    |
| Underweight            | 8.3           | 1.1  | (0.6,2.1)   | 40.6                                      | 3.0  | (2.3,4.1)   | 18.8          | 3.1  | (2.2,4.6)   | 15.8          | 4.7         | (2.7,8.1)   |
| Stunting               | 77.6          | 10.7 | (8.6,13.2)  | 175.4                                     | 13.2 | (11.4,15.4) | 96.2          | 16.2 | (13.1,19.8) | 56.0          | 16.8        | (12.8,21.6) |
| Wasting                | 15.8          | 2.2  | (1.1,4.1)   | 23.1                                      | 1.7  | (1.0,2.8)   | 11.1          | 1.9  | (1.1,3.1)   | 12.5          | 3.7         | (2.0,6.9)   |
| Overweight             | 75.9          | 11.0 | (8.8,13.5)  | 120.7                                     | 9.7  | (8.2,11.5)  | 47.6          | 8.3  | (6.1,11.2)  | 31.5          | 9.6         | (6.8,13.3)  |
| Nutritional status     | Food Security |      |             | Food Insecurity in Schoolers              |      |             |               |      |             |               |             |             |
|                        |               |      |             | Mild                                      |      |             | Moderate      |      |             | Severe        |             |             |
|                        | N (thousands) | %    | (95% IC)    | N (thousands)                             | %    | (95% IC)    | N (thousands) | %    | (95% IC)    | N (thousands) | %           | (95% IC)    |
| Stunting               | 48.4          | 4.4  | (3.3,5.8)   | 128.7                                     | 6.4  | (5.4,7.4)   | 75.8          | 8.0  | (6.3,10.3)  | 64.2          | 10.1<br>0.1 | (7.9,12.7)  |
| Overweight             | 250.4         | 23.0 | (20.4,25.7) | 377.2                                     | 18.9 | (17.2,20.8) | 161.3         | 17.4 | (15.1,19.9) | 112.5         | 17.8        | (14.9,21.0) |
| Obesity                | 190.6         | 17.5 | (15.1,20.2) | 310.8                                     | 15.6 | (14.0,17.3) | 136.4         | 14.7 | (12.5,17.3) | 68.6          | 10.8        | (8.3,14.0)  |
| Overweight and Obesity | 441.0         | 40.4 | (37.3,43.7) | 688.0                                     | 34.5 | (32.3,36.8) | 297.7         | 32.1 | (28.9,35.5) | 181.1         | 28.6        | (24.8,32.6) |
| Nutritional status     | Food Security |      |             | Food Insecurity in Women                  |      |             |               |      |             |               |             |             |
|                        |               |      |             | Mild                                      |      |             | Moderate      |      |             | Severe        |             |             |
|                        | N (thousands) | %    | (95% IC)    | N (thousands)                             | %    | (95% IC)    | N (thousands) | %    | (95% IC)    | N (thousands) | %           | (95% IC)    |
| Underweight            | 20.9          | 1.2  | (0.6,2.1)   | 22.7                                      | 0.69 | (0.5,0.9)   | 19.1          | 1.2  | (0.6,2.5)   | 12.9          | 1.3         | (0.8,2.3)   |



|    |                           |        |      |             |        |      |             |        |      |             |       |      |             |
|----|---------------------------|--------|------|-------------|--------|------|-------------|--------|------|-------------|-------|------|-------------|
| 1  |                           |        |      |             |        |      |             |        |      |             |       |      |             |
| 2  |                           |        |      |             |        |      |             |        |      |             |       |      |             |
| 3  |                           |        |      |             |        |      |             |        |      |             |       |      |             |
| 4  |                           |        |      |             |        |      |             |        |      |             |       |      |             |
| 5  | Overweight                | 683.5  | 37.9 | (35.1,40.7) | 1301.7 | 39.8 | (37.7,41.9) | 563.9  | 37.2 | (33.9,40.8) | 344.7 | 35.6 | (31.9,39.5) |
| 6  |                           |        |      |             |        |      |             |        |      |             |       |      |             |
| 7  | Obesity                   | 589.9  | 32.7 | (29.9,35.5) | 1206.9 | 36.9 | (34.9,38.9) | 584.1  | 38.6 | (35.3,41.9) | 365.7 | 37.8 | (33.6,42.3) |
| 8  |                           |        |      |             |        |      |             |        |      |             |       |      |             |
| 9  | Overweight<br>and Obesity | 1273.4 | 70.5 | (67.7,73.3) | 2508.7 | 76.7 | (74.8,78.6) | 1148.0 | 75.9 | (73.1,78.4) | 710.4 | 73.5 | (69.8,76.8) |
| 10 | <hr/>                     |        |      |             |        |      |             |        |      |             |       |      |             |
| 11 |                           |        |      |             |        |      |             |        |      |             |       |      |             |
| 12 |                           |        |      |             |        |      |             |        |      |             |       |      |             |
| 13 |                           |        |      |             |        |      |             |        |      |             |       |      |             |
| 14 |                           |        |      |             |        |      |             |        |      |             |       |      |             |
| 15 |                           |        |      |             |        |      |             |        |      |             |       |      |             |
| 16 |                           |        |      |             |        |      |             |        |      |             |       |      |             |
| 17 |                           |        |      |             |        |      |             |        |      |             |       |      |             |
| 18 |                           |        |      |             |        |      |             |        |      |             |       |      |             |
| 19 |                           |        |      |             |        |      |             |        |      |             |       |      |             |
| 20 |                           |        |      |             |        |      |             |        |      |             |       |      |             |
| 21 |                           |        |      |             |        |      |             |        |      |             |       |      |             |
| 22 |                           |        |      |             |        |      |             |        |      |             |       |      |             |
| 23 |                           |        |      |             |        |      |             |        |      |             |       |      |             |
| 24 |                           |        |      |             |        |      |             |        |      |             |       |      |             |
| 25 |                           |        |      |             |        |      |             |        |      |             |       |      |             |
| 26 |                           |        |      |             |        |      |             |        |      |             |       |      |             |
| 27 |                           |        |      |             |        |      |             |        |      |             |       |      |             |
| 28 |                           |        |      |             |        |      |             |        |      |             |       |      |             |
| 29 |                           |        |      |             |        |      |             |        |      |             |       |      |             |
| 30 |                           |        |      |             |        |      |             |        |      |             |       |      |             |
| 31 |                           |        |      |             |        |      |             |        |      |             |       |      |             |
| 32 |                           |        |      |             |        |      |             |        |      |             |       |      |             |
| 33 |                           |        |      |             |        |      |             |        |      |             |       |      |             |
| 34 |                           |        |      |             |        |      |             |        |      |             |       |      |             |
| 35 |                           |        |      |             |        |      |             |        |      |             |       |      |             |
| 36 |                           |        |      |             |        |      |             |        |      |             |       |      |             |
| 37 |                           |        |      |             |        |      |             |        |      |             |       |      |             |
| 38 |                           |        |      |             |        |      |             |        |      |             |       |      |             |
| 39 |                           |        |      |             |        |      |             |        |      |             |       |      |             |
| 40 |                           |        |      |             |        |      |             |        |      |             |       |      |             |
| 41 |                           |        |      |             |        |      |             |        |      |             |       |      |             |
| 42 |                           |        |      |             |        |      |             |        |      |             |       |      |             |
| 43 |                           |        |      |             |        |      |             |        |      |             |       |      |             |
| 44 |                           |        |      |             |        |      |             |        |      |             |       |      |             |
| 45 |                           |        |      |             |        |      |             |        |      |             |       |      |             |
| 46 |                           |        |      |             |        |      |             |        |      |             |       |      |             |
| 47 |                           |        |      |             |        |      |             |        |      |             |       |      |             |
| 48 |                           |        |      |             |        |      |             |        |      |             |       |      |             |
| 49 |                           |        |      |             |        |      |             |        |      |             |       |      |             |

For peer review only

In the logistic regression model for preschool children, the highest prevalence of stunting occurred in households with moderate or severe HFI ( $p < 0.05$ ) (Table 3).

**Table 3. Logistic regression model for mother-preschooler pairs: Stunting in children <5**

|                                            | AOR*  | P>t    | 95% CI     |
|--------------------------------------------|-------|--------|------------|
| Mild HFI                                   | 1.261 | 0.232  | (0.9,1.8)  |
| Moderate HFI                               | 1.663 | 0.036  | (1.0, 2.7) |
| Severe HFI                                 | 1.993 | 0.007  | (1.2,3.3)  |
| Maternal obesity                           | 1.402 | 0.266  | (0.8,2.5)  |
| Mild HFI and maternal obesity              | 0.622 | 0.207  | (0.3,1.3)  |
| Moderate HFI and maternal obesity          | 0.463 | 0.069  | (0.2,1.1)  |
| Severe HFI and maternal obesity            | 0.219 | 0.011  | (0.1,0.7)  |
| Age of children                            | 0.889 | 0.007  | (0.8,0.9)  |
| Beneficiaries of food assistance programs  | 1.239 | 0.119  | (0.9,1.6)  |
| <b>Urbanicity</b>                          |       |        |            |
| Rural                                      | 1.421 | 0.006  | (1.1,1.8)  |
| <b>Maternal Education</b>                  |       |        |            |
| Primary school                             | 0.534 | <0.001 | (0.4,0.8)  |
| Secondary school                           | 0.465 | 0.001  | (0.3,0.7)  |
| Senior high school ( <i>Preparatoria</i> ) | 0.342 | <0.001 | (0.2,0.6)  |
| Bachelor or higher                         | 0.481 | 0.042  | (0.2,0.9)  |
| Const                                      | 0.256 | 0.000  | (0.2,0.4)  |

\*Model included all independent variables listed in table.

1  
2  
3 An interaction between HFI and maternal obesity status was found among  
4 preschoolers (Figure 1). Specifically, severe HFI increased the risk of stunting  
5 among children with non-obese mothers but not among children with obese  
6 mothers. Among preschoolers, there were no significant associations between  
7 overweight, HFI and maternal characteristics.  
8  
9

10  
11  
12  
13  
14  
15  
16 Among school-aged children the logistic regression model revealed a significantly  
17 lower prevalence for overweight and obesity among those living in households with  
18 mild, moderate and severe HFI ( $p < 0.05$ ) (Table 4). A lower prevalence of child  
19 overweight/obesity was also found ( $p < 0.05$ ) in rural areas ( $p = 0.007$ ) and among  
20 those with mothers of higher levels of education (bachelors or more) ( $p < 0.001$ ).  
21  
22  
23  
24  
25  
26  
27

28 The logistic regression model for stunting in school age children documented  
29 significant associations with maternal characteristics, but not with HFI (data not  
30 shown).  
31  
32  
33  
34  
35  
36  
37  
38  
39  
40  
41  
42  
43  
44  
45  
46  
47  
48  
49  
50  
51  
52  
53  
54  
55  
56  
57  
58  
59  
60

**Table 4. Logistic regression model for mother-schooler pairs: both mother and child with overweight/obesity: Overweight and obesity in school-aged children**

|                                            | AOR* | P>t    | 95% CI      |
|--------------------------------------------|------|--------|-------------|
| Mild HFI                                   | 0.79 | 0.017  | (0.6,0.9)   |
| Moderate HFI                               | 0.72 | 0.005  | (0.57,0.90) |
| Severe HFI                                 | 0.67 | 0.004  | (0.51,0.9)  |
| Maternal Overweight                        | 2.25 | <0.001 | (1.8,2.8)   |
| Maternal Obesity                           | 3.96 | <0.001 | (3.3,4.8)   |
| Child age                                  |      |        |             |
|                                            | 1.12 | <0.001 | (1.1,1.2)   |
| Beneficiaries of food assistance programs  | 0.85 | 0.039  | (0.7,0.9)   |
| <b>Urbanicity</b>                          |      |        |             |
| Rural                                      | 0.79 | 0.007  | (0.7,0.9)   |
| <b>Maternal Education</b>                  |      |        |             |
| Primary school                             | 0.87 | 0.342  | (0.6,1.2)   |
| Secondary school                           | 1.11 | 0.484  | (0.8,1.5)   |
| Senior high school ( <i>Preparatoria</i> ) | 1.12 | 0.485  | (0.8,1.6)   |
| Bachelor or higher                         | 1.93 | <0.001 | (1.3,2.9)   |
| Const                                      | 0.12 | 0.000  | (0.1,0.2)   |

\*Model included all independent variables listed in table.

## Discussion

We sought both to describe the nutritional status of <11-year-old-children and their mothers, and to explore the relationship between their nutritional status and HFI. An important strength of this study is that our research sample is representative of the Mexican population.

Many countries face an increasing prevalence of adult overweight while still struggling with childhood stunting. Our study found, first, that moderate and severe HFI was associated with low height in children under five with mothers who were overweight or obese. Similar results have been obtained by other studies on the double burden of malnutrition, where stunted children live with overweight mothers in the same – particularly in poor - households [27,28]. The problem has been analyzed at the household and individual levels both globally and locally in several countries, Mexico among them [29].

A possible explanation for this phenomenon lies in the fact that excess weight in mothers indicates sufficient income for a diet rich in energy but not necessarily in nutrients. [30]

It can be reasonably inferred that the association between HFI and energy deficit is attributable to variable intra-household resource allocations - especially in poor rural areas - involving less food for children. The diets of overweight mothers suggest a low content of micronutrients alongside a high percentage of energy from saturated fat and refined sugars. These mothers are clearly eating “enough” in terms of energy. Nutritional status is therefore influenced by the quality, diversity,

1  
2  
3 availability and accessibility of food and the association of these conditions with  
4  
5 food security/insecurity [31].  
6  
7

8  
9 It documented an HFI-weight status correlation which has been labeled a  
10  
11 "paradox," in that HFI, which results from insufficient economic resources to  
12  
13 purchase food, is associated with obesity, a consequence of overconsumption [15,  
14  
15 32].  
16  
17

18  
19 Our results agree with those of a previous study where children from HFI weighed  
20  
21 less than did their peers from food-secure households. Indeed, their average body  
22  
23 weight was within the normal range, whereas their peers from food-secure  
24  
25 households were at risk of becoming overweight. In other words, children in HFI do  
26  
27 not necessarily need more calories from food to sustain adequate growth.  
28  
29

30  
31  
32 Furthermore, adequate growth is not the only indicator of nutritional well-being  
33  
34 among children living in HFI [28]. Nutritional status is also influenced by the quality  
35  
36 of foods consumed. The perception that, on one hand, the HFI-obesity association  
37  
38 is a paradox and, on the other, that children and adolescents are protected from  
39  
40 HFI by their parents should be replaced by new knowledge from qualitative and  
41  
42 quantitative research. It has now been demonstrated that obesity is an expected  
43  
44 consequence of HFI for some subpopulations and at certain ages. Moreover, it has  
45  
46 been shown that children and adolescents are often affected by HFI through both  
47  
48 nutritional and non-nutritional pathways despite parental intentions or beliefs to the  
49  
50 contrary [33].  
51  
52  
53  
54  
55  
56  
57  
58  
59  
60

1  
2  
3 A recent analysis of 16 Latin American countries revealed that all of them were  
4 running programs aimed at preventing undernutrition, and most were in the  
5 process of implementing obesity prevention strategies as part of their policy  
6 agendas [34]. According to the literature, cash transfers and food distribution  
7 programs may be prompting increased energy intake at the household level [35,  
8 36] and exacerbating the HFI-obesity link in populations that do not need  
9 assistance programs that focus on caloric intake. This has led to concerns about  
10 the possible contribution of these programs to obesity in populations who are not  
11 energy deficient, and evidences the need for countries with the double burden of  
12 malnutrition to include obesity prevention strategies as an essential component of  
13 their cash and food transfer programs.  
14  
15  
16  
17  
18  
19  
20  
21  
22  
23  
24  
25  
26  
27  
28  
29

30 The principal findings of our study are particularly relevant for countries undergoing  
31 nutritional transition. Mexico has been witnessing rapid epidemiological and  
32 demographic changes with nutritional and environmental components. The health  
33 profile of the Mexican population is undergoing a shift from high rates of mortality  
34 and infectious diseases - typical of poor countries - to low rates of mortality and  
35 high rates of non-communicable diseases - the main cause of mortality in wealthy  
36 countries [37].  
37  
38  
39  
40  
41  
42  
43  
44  
45  
46

47 Our study was subject to several limitations. First, its cross-sectional design  
48 restricts the drawing of causal inferences. Additionally, our findings refer  
49 specifically to Mexican children and adolescents and similar population but cannot  
50 be generalized to other population groups.  
51  
52  
53  
54  
55  
56  
57  
58  
59  
60

1  
2  
3 Nevertheless, our study also has a number of strengths. Among these, our findings  
4 contribute to the limited research available on the relationship between HFI and the  
5 nutritional status of mother-child pairs. In addition, this is one of the first studies in  
6 this area dealing specifically with the Mexican population. The large sample size of  
7 our study constitutes another strength which allowed us to introduce possible  
8 confounders in the statistical models.  
9

10  
11  
12  
13  
14  
15  
16  
17  
18 Recognizing the apparently contradictory co-existence of adult overweight/obesity  
19 and child underweight in the same household and understanding its HFI  
20 association is a prerequisite for planning effective and integral nutritional  
21 strategies. Efforts to abate overnutrition, undernutrition and inadequate dietary  
22 quality must be anchored in this knowledge if households at different HFI levels are  
23 to see an actual positive change in their nutritional status.  
24  
25  
26  
27  
28  
29  
30  
31

32  
33 An intriguing finding from our study is that among preschoolers HFI severity  
34 increased their risk of stunting if their mothers were not obese. However this was  
35 not the case if their mothers were obese. This may be because with the surge of  
36 urbanization, household incomes increase and food becomes more available in  
37 terms of quantity, but not quality [38]. Specifically the foods available to poor urban  
38 households are likely to be high in energy, and it is possible that lack for maternal  
39 obesity in food insecure households may indicate that there isn't adequate food  
40 quality for the child leading to micronutrient deficiencies and protein quality issues  
41 negatively affecting the child's growth, especially height. By contrast, it is possible  
42 that maternal obesity indicates better access to calories and nutrients that the child  
43  
44  
45  
46  
47  
48  
49  
50  
51  
52  
53  
54  
55  
56  
57  
58  
59  
60



1  
2  
3 needs to grow well and hence the lower levels of stunting and relatively lack of  
4  
5 responsiveness of stunting to HFI severity among obese mothers.  
6  
7

## 8 9 **Conclusions**

10  
11 The double burden of malnutrition in Mexico occurs most notably among mother-  
12  
13 child pairs living with HFI. Crafting a sound approach to dealing with malnutrition is  
14  
15 complex because of its multi-dimensional character [39]. Policies and programs  
16  
17 must tackle chronic under-nutrition and over-nutrition according to the food and  
18  
19 nutritional needs of each age group, rather than assuming that these needs will be  
20  
21 met by targeting the household as a homogenous unit. This study adds to the  
22  
23 evidence emphasizing the importance of monitoring household food security using  
24  
25 experience-based scales such as ELCSA that have been deemed highly useful for  
26  
27 improving food security governance [40].  
28  
29  
30  
31  
32  
33  
34  
35  
36  
37  
38  
39  
40  
41  
42  
43  
44  
45  
46  
47  
48  
49  
50  
51  
52  
53  
54  
55  
56  
57  
58  
59  
60

### List of abbreviations

BMI-Body Mass Index

ELCSA - Caribbean Food Security Scale

ENSANUT 2012 - Mexican National Health and Nutrition Survey in Latin American

HFI - Household Food Insecurity

WHO- World Health Organization

**Funding:** The National Health and Nutrition Survey (ENSANUT 2012) was funded by the Mexican Ministry of Health.

**Ethics approval and consent to participate:** All study procedures involving human participants were approved by the Ethics Committee of the National Institute of Public Health in Mexico. Written informed consent was obtained from all survey participants with parents serving as proxies of minors under 7 years.

### Availability of data and materials

<https://drive.google.com/a/cimat.mx/folderview?id=0BzGYRm5Poz8OdWhGWUhadENBSDA&usp=sharing>

**Data sharing statement:** No additional data available.

**Competing interests:** The authors declared having no conflict of interest.

**Authors' contributions:** The responsibilities of the authors were distributed as follows: TSL and IMGH contributed to data analysis and interpretation. They drafted the manuscript based on the input and feedback of all the co-authors. VMR, LCN and MCMR contributed to the study design and critical review of the manuscript. TSL and RPE contributed to the study design, interpretation of results and critical review of the manuscript. All the authors read and approved the final version of the manuscript.

1  
2  
3 **Acknowledgments:** The authors wish to thank Erick Mauricio Rolando López for  
4 his support in developing the tables. They also gratefully acknowledge the staff of  
5  
6  
7  
8 the National Health and Nutrition Survey 2012 who made this work possible.  
9  
10  
11  
12  
13  
14  
15  
16  
17  
18  
19  
20  
21  
22  
23  
24  
25  
26  
27  
28  
29  
30  
31  
32  
33  
34  
35  
36  
37  
38  
39  
40  
41  
42  
43  
44  
45  
46  
47  
48  
49  
50  
51  
52  
53  
54  
55  
56  
57  
58  
59  
60

For peer review only

## References

1. Food and Agriculture Organization FAO. Food security statistics home. <http://www.fao.org/economic/ess/ess-fs/en/> 2016. Accessed April 14, 2016.
2. Food and Agriculture Organization, International Fund for Agricultural Development, World Food Programme. The state of food insecurity in the world 2014. Strengthening the enabling environment for food security and nutrition. Rome, Italy, 2014.
3. UN Millennium Project 2005. Halving hunger: it can be done. Task Force on Hunger, 2005. <http://www.unmillenniumproject.org/documents/Hunger-lowres-complete.pdf>. Accessed April 14, 2016.
4. Jones AD, Ngure FM, Pelto G, Young SL. What are we assessing when we measure food security? A compendium and review of current metrics. *Adv Nutr*. 2013;4:481-505.
5. Pérez-Escamilla R, Melgar-Quiñonez H, Nord M, Álvarez MC, Segall-Correa AM. Escala latinoamericana y caribeña de seguridad alimentaria (ELCSA). In Memorias de la 1ª Conferencia en América Latina y el Caribe sobre la medición de la seguridad alimentaria en el hogar. *Perspectivas en Nutrición Humana*. 2007; Suppl 1:117-34.
6. Black RE, Allen LH, Bhutta ZA, Caulfield LE, De Onis M, Ezzati M, Mathers C, Rivera J. Maternal and Child Undernutrition Study Group. Maternal and child undernutrition: global and regional exposures and health consequences. *The Lancet*. 2008;371:243-260.
7. Martin KS, Ferris AM. Food insecurity and gender are risk factors for obesity. *J Nut Educ Behav*. 2007;39:31-36.
8. Townsend MS, Peerson J, Love B, Achterberg C, Murphy SP. Food insecurity is positively related to overweight in women. *J Nutr*. 2001;131:1738-1745.
9. Adams EJ, Grummer-Strawn L, Chavez G. Food insecurity is associated with increased risk of obesity in California women. *J Nutr*. 2003;133:1070-1074.
10. Morales-Ruán MC, Méndez-Gómez Humarán I, Shamah-Levy T, Valderrama-Álvarez Z, Melgar-Quiñonez H. Food insecurity is associated with obesity in adult women of Mexico. *Salud Publica Mex*. 2014; 56 Suppl 1:54-61.
11. Hanson KL, Sobal J, Frongillo EA. Gender and Marital Status Clarify Associations between food insecurity and body weight. *J Nutr*. 2007; 137:1460–1465.
12. Nord M, Andrews M, Carlson S. Household food security in the US, 2008. US Department of Agriculture. Economic Research Service. Washington DC: 2009.
13. Pérez-Escamilla R, Obbagy JE, Altman JM, Essery EV, McGrane MM, Wong YP, Spahn JM, Williams CL. Dietary energy density and body weight in adults and children: a systematic review. *J Acad Nutr Diet*. 2012; 112:671-84.

14. Drewnowski A, Specter SE. Poverty and obesity: the role of energy density and energy costs. *Am J Clin Nutr*. 2004;79:6-16.
15. Dietz, W. Does hunger cause obesity? *Pediatrics*. 1995;96:766-767.
16. Shamah-Levy T, Mundo-Rosas V, Rivera-Dommarco JA. Magnitude of food insecurity in Mexico: its relationship with nutritional status and socioeconomic factors. *Salud Publica Mex*. 2014; 56 Suppl 1:79-S85.
17. Barquera S, Campos-Nonato I, Hernández-Barrera L, Pedroza-Tobías A, Rivera-Dommarco JA. Prevalence of obesity in Mexican adults 2000-2012. *Salud Publica Mex*. 2013;55 Suppl 2:151-160.
18. Cuevas-Nasu L, Rivera-Dommarco JA, Shamah-Levy T, Mundo-Rosas V, Méndez-Gómez Humarán I. Food insecurity and nutritional status of pre-school children in Mexico. *Salud Publica Mex*. 2014;56 Suppl 1:47-53.
19. Black RE, Victora CG, Walker SP, Bhutta ZA, Christian P, de Onis M, et al. Maternal and child undernutrition and overweight in low-income and middle-income countries. *Lancet*. 2013;382:427–51.
20. Romero-Martínez M, Shamah-Levy T, Franco-Núñez A, Villalpando S, Cuevas-Nasu L, Gutiérrez JP, Rivera J. National Health and Nutrition Survey 2012: design and coverage. *Salud Publica Mex*. 2013;55 Suppl 2:332-340.
21. Comité Científico de la ELCSA. Escala Latinoamericana y Caribeña de seguridad alimentaria (ELCSA): manual de uso y aplicaciones. 2012. Food and Agriculture Organization. <http://www.fao.org/3/a-i3065s.pdf>. Accessed April 19, 2016.
22. Lohman T, Roche AF, and Martorell R. Anthropometric standardization reference manual: Abridged edition. Champaign, IL: Human Kinetics Books. 1988.
23. Habicht JP. Standardization of quantitative epidemiological methods in the field. *Pan Am Sanit Bur*. 1974;76:375-384.
24. World Health Organization. WHO child growth standards: length/height-for-age, weight-for-age, weight-for-length, weight-for-height and body mass index-for-age: methods and development. 2006. [http://www.who.int/childgrowth/standards/Technical\\_report.pdf](http://www.who.int/childgrowth/standards/Technical_report.pdf). Accessed April 19, 2016.
25. Onis MD, Onyango AW, Borghi E, Siyam A, Nishida C, Siekmann J. Development of a WHO growth reference for school-aged children and adolescents. *Bull World Health Organ*. 2007;85:660-667.
26. World Health Organization. Obesity: preventing and managing the global epidemic. Report of a WHO consultation. 2000. [http://www.who.int/nutrition/publications/obesity/WHO\\_TRS\\_894/en/](http://www.who.int/nutrition/publications/obesity/WHO_TRS_894/en/). Accessed April 19, 2016.
27. Popkin BM. Global nutrition dynamics: the world is shifting rapidly toward a diet linked with noncommunicable diseases. *Am J Clin Nutr*. 2006;84:289-98.

- 1  
2  
3 28. Gubert MB, Spaniol AM, Segall-Corrêa AM, Pérez-Escamilla R. Understanding the Double Burden of Malnutrition in Food Insecure Households in Brazil. *Maternal Child Nutr.* 2016 [Epub ahead of print].
- 4  
5  
6  
7 29. Kroker-Lobos MF, Pedroza-Tobias A, Pedraza LS, Rivera JA. The double  
8 burden of undernutrition and excess body weight in Mexico. *Am J Clin Nutr.*  
9 2014;100:1652–8. doi: 10.3945/ajcn.114.083832.
- 10  
11 30. Matheson DM, Varady J, Varady A, Killen JD. Household food security and  
12 nutritional status of Hispanic children in the fifth grade. *Am J Clin Nutr.*  
13 2002;76:210-217.
- 14  
15 31. Rivera JA, Pedraza LS, Martorell R, Gil A. Introduction to the double burden  
16 of undernutrition and excess weight in Latin America. *Am J Clin Nutr.* 2014;100  
17 Suppl:1613-1616.
- 18  
19 32. Frongillo EA, Bernal J. Understanding the Coexistence of Food Insecurity  
20 and Obesity. *Curr Pediatr Rep.* 2014;2:284-290.
- 21  
22 33. Frongillo EA. Confronting myths about household food insecurity and excess  
23 weight. *Cad Saúde Pública.* 2013;29:229-230.
- 24  
25  
26 34. Fanzo J, Pronyk P, Dasgupta A, Towle M, Menon V, Denning G, Zycherman  
27 RF, Roth GI. An evaluation of progress toward the Millennium Development Goal  
28 One Hunger Target: A country-level, food and nutrition security perspective. Center  
29 for Global Health and Economic Development. The Earth Institute of Columbia  
30 University. [http://millenniumvillages.org/wp-content/uploads/2010/01/Evaluation-of-  
31 Progress\\_Fanzo.pdf](http://millenniumvillages.org/wp-content/uploads/2010/01/Evaluation-of-Progress-Fanzo.pdf). 2010. Accessed jun 21, 2016.
- 32  
33 35. Dinour LM, Bergen D, Yeh M. The food insecurity–obesity paradox: a review  
34 of the literature and the role food stamps may play. *J Am Diet Assoc.*  
35 2007;107:1952-1961.
- 36  
37 36. Leroy JL, Gadsden P, Rodríguez-Ramírez S, González de Cossío T. Cash  
38 and in-kind transfers in poor rural communities in Mexico increase household fruit,  
39 vegetable, and micronutrient consumption but also lead to excess energy  
40 consumption. *J Nutr.* 2010;140:612–7.
- 41  
42 37. Stevens G, Dias RH, Thomas KJ, Rivera JA, Carvalho N, Barquera S, Hill K,  
43 Ezzati M. Characterizing the Epidemiological Transition in Mexico: National and  
44 Subnational Burden of Diseases, Injuries, and Risk Factors. *PLoS Med.* 2008;5,  
45 e125. doi:10.1371/journal.pmed.0050163.
- 46  
47 38. Kolopaking R, Bardosono S, Fahmida U. Maternal self-efficacy in the home  
48 food environment: a qualitative study among low-income mothers of nutritionally at-  
49 risk children in an urban area of Jakarta, Indonesia. *J Nut Educ Behav.*  
50 2011;43:180-188. doi:10.1016/j.jneb.2009.10.010.
- 51  
52  
53  
54  
55 39. Mahmudiono T, Nindya TS, Andrias DR, Megatsari H, Rosenkranz RR. The  
56 effectiveness of nutrition education for overweight/obese mothers with stunted  
57  
58  
59  
60

1  
2  
3 children (NEO-MOM) in reducing the double burden of malnutrition in Indonesia:  
4 study protocol for a randomized controlled trial. *BMC Public Health*. 2016;16:1.  
5  
6

7 40. Pérez-Escamilla R. Can experience-based household food security scales  
8 help improve food security governance? *Glob Food Sec*. 2012;1:120-125.  
9  
10  
11  
12  
13  
14  
15  
16  
17  
18  
19  
20  
21  
22  
23  
24  
25  
26  
27  
28  
29  
30  
31  
32  
33  
34  
35  
36  
37  
38  
39  
40  
41  
42  
43  
44  
45  
46  
47  
48  
49  
50  
51  
52  
53  
54  
55  
56  
57  
58  
59  
60

For peer review only

1  
2  
3  
4  
5  
6  
7  
8  
9  
10  
11  
12  
13  
14  
15  
16  
17  
18  
19  
20  
21  
22  
23  
24  
25  
26  
27  
28  
29  
30  
31  
32  
33  
34  
35  
36  
37  
38  
39  
40  
41  
42  
43  
44  
45  
46  
47  
48  
49  
50  
51  
52  
53  
54  
55  
56  
57  
58  
59  
60

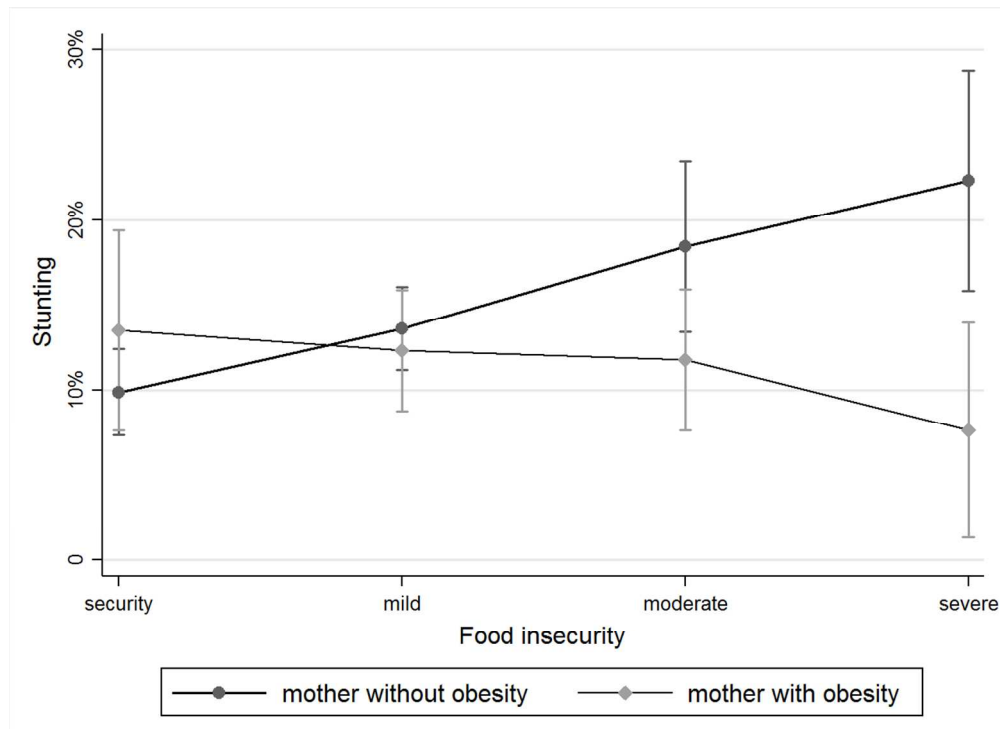

Figure 1. Effect of HFI-maternal obesity interaction on stunting among children <5 years

454x330mm (72 x 72 DPI)

ew only



1  
2  
3  
4  
5  
6  
7  
8 **Checklist of items that included in the manuscript: Food insecurity and the nutritional status of**  
9 **Mexican mother-child pairs**  
10

|                           | PAGE  |
|---------------------------|-------|
| Title and abstract        | 1-2   |
| Introduction              | 4-6   |
| Objectives                | 6     |
| Study design              | 6-7   |
| Setting                   | 7     |
| Participants              | 7     |
| Variables                 | 7     |
| Data sources/ measurement | 7     |
| Study size                | 7     |
| Quantitative variables    | 8     |
| Statistical methods       | 10    |
| Results                   | 11    |
| Participants              | 11    |
| Descriptive data          | 11-13 |
| Outcome data              | 14    |
| Main results              | 15-16 |
| Other analyses            | 17-19 |
| Discussion                | 20    |
| Key results               | 20-24 |
| Limitations               | 22-23 |

1  
2  
3  
4  
5  
6  
7  
8  
9  
10  
11  
12  
13  
14  
15  
16  
17  
18  
19  
20  
21  
22  
23  
24  
25  
26  
27  
28  
29  
30  
31  
32  
33  
34  
35  
36  
37  
38  
39  
40  
41  
42  
43  
44  
45  
46  
47  
48  
49  
50  
51  
52  
53  
54  
55  
56  
57  
58  
59  
60

|                           |       |
|---------------------------|-------|
| Interpretation            | 20-24 |
| Generalizability          | 24    |
| <b>Other information:</b> |       |
| Funding                   | 25    |

For peer review only

# BMJ Open

## Food insecurity and the nutritional status of Mexican mother-child analysis of the National Health and Nutrition Survey 2012

|                                 |                                                                                                                                                                                                                                                                                                                                                                                                                                                                                |
|---------------------------------|--------------------------------------------------------------------------------------------------------------------------------------------------------------------------------------------------------------------------------------------------------------------------------------------------------------------------------------------------------------------------------------------------------------------------------------------------------------------------------|
| Journal:                        | <i>BMJ Open</i>                                                                                                                                                                                                                                                                                                                                                                                                                                                                |
| Manuscript ID                   | bmjopen-2016-014371.R1                                                                                                                                                                                                                                                                                                                                                                                                                                                         |
| Article Type:                   | Research                                                                                                                                                                                                                                                                                                                                                                                                                                                                       |
| Date Submitted by the Author:   | 02-Mar-2017                                                                                                                                                                                                                                                                                                                                                                                                                                                                    |
| Complete List of Authors:       | Shamah- Levy, Teresa; Instituto Nacional de Salud Publica, Nutrition Monitoring<br>Mundo-Rosas, Verónica ; Instituto Nacional de Salud Publica, Nutrition Monitoring<br>Morales-Ruan, Carmen; Instituto Nacional de Salud Publica, Nutrition Monitoring<br>Cuevas-Nasu, Lucia; Instituto Nacional de Salud Publica, Nutrition Monitoring<br>Méndez-Gómez-Humarán, Ignacio; Center for Research in Mathematics (CIMAT)<br>Pérez-Escamilla, Rafael; Yale School of Public Health |
| <b>Primary Subject Heading</b>: | Public health                                                                                                                                                                                                                                                                                                                                                                                                                                                                  |
| Secondary Subject Heading:      | Epidemiology, Health policy                                                                                                                                                                                                                                                                                                                                                                                                                                                    |
| Keywords:                       | NUTRITION & DIETETICS, PUBLIC HEALTH, EPIDEMIOLOGY                                                                                                                                                                                                                                                                                                                                                                                                                             |
|                                 |                                                                                                                                                                                                                                                                                                                                                                                                                                                                                |

SCHOLARONE™  
Manuscripts

1  
2  
3 Food insecurity and the nutritional status of Mexican mother-child analysis of the  
4 National Health and Nutrition Survey 2012  
5  
6

7 Teresa Shamah-Levy<sup>1\*</sup> ([tshamah@insp.mx](mailto:tshamah@insp.mx)), Verónica Mundo-Rosas<sup>1</sup>  
8 ([vmundo@insp.mx](mailto:vmundo@insp.mx)), Carmen Morales-Ruan<sup>1</sup> ([cmruan@insp.mx](mailto:cmruan@insp.mx)), Lucia Cuevas-  
9 Nasu<sup>1</sup> ([lcuevas@insp.mx](mailto:lcuevas@insp.mx)), Ignacio Méndez Gómez –Humarán<sup>2</sup>  
10 ([imendez@cimat.mx](mailto:imendez@cimat.mx)), Rafael Pérez-Escamilla<sup>3</sup> ([rafael.perez-escamilla@yale.edu](mailto:rafael.perez-escamilla@yale.edu))  
11  
12

- 13 • Center for Nutrition and Health Research, National Institute of Public Health  
14 (INSP), Cuernavaca, Morelos, Mexico
- 15 • Center for Research in Mathematics (CIMAT), Aguascalientes,  
16 Aguascalientes, Mexico
- 17 • Yale School of Public Health, New Haven, Connecticut, USA  
18  
19

20 \*Correspondence should be addressed to Dr. Teresa Shamah-Levy, Research  
21 Center for Nutrition and Health Research, National Institute of Public Health  
22 (INSP), Av. Universidad No. 655, Col. Sta. Ma. Ahuacatlán, C.P. 62100,  
23 Cuernavaca, Morelos, México  
24 Telephone/Fax number: +52 (777) 3113787, e-mail: [tshamah@insp.mx](mailto:tshamah@insp.mx)  
25  
26  
27  
28  
29

30 WORD COUNT: 2899

31 NUMBER OF FIGURES: 1

32 NUMBER OF TABLES: 4  
33  
34  
35  
36  
37  
38  
39  
40  
41  
42  
43  
44  
45  
46  
47  
48  
49  
50  
51  
52  
53  
54  
55  
56  
57  
58  
59  
60

## Abstract

**Background.** Household Food Insecurity (HFI) has been associated with the presence of overweight mothers and underweight children in the same household. Furthermore, adult obesity has been linked to both child obesity and child undernutrition. The twofold purpose of this article was to examine the association between HFI and risk of childhood stunting, and to determine whether this association is modified by maternal-child overweight/obesity. **Methods.** We assessed the association between HFI and the nutritional status of mothers and their <11-year-old children based on data from the Mexican National Health and Nutrition Survey (*ENSANUT 2012* by its initials in Spanish). Our study sample included 5,087 mother-preschool child pairs and 7,181 mother-schoolchild pairs. HFI was measured according to the Latin American and Caribbean Food Security Scale (*ELCSA* by its initials in Spanish). Multiple logistic regression models were used to examine relevant associations, adjusting for pertinent covariates. **Results.** Stunting proved more prevalent in preschool children with moderate or severe HFI (16.2% and 16.8%, respectively) ( $p=0.036$  and  $p=0.007$ , respectively) than in their counterparts with mild or no HFI (13.2% and 10.7%, respectively). Furthermore, the interaction between HFI and maternal obesity had a significant impact on stunting in preschool children ( $p<0.05$ ). Specifically, severe HFI increased risk of stunting in children with non-obese mothers but not in those with obese mothers. **Conclusion.** We have discovered a new relationship between HFI and maternal obesity on the one hand and risk of childhood stunting on the other. This may reflect a shared mechanism involving dual forms of malnutrition. Mexico urgently needs anti-HFI policies and programs that prevent chronic child undernutrition coupled with maternal overweight/obesity in the same household.

**Keywords.** Food insecurity; obesity; undernutrition; nutrition survey; nutrition transition; Mexico

### Strengths and limitations of this study

Our study was subject to several limitations. Its cross-sectional design restricts the drawing of causal inferences, and our results cannot be generalized, as they refer specifically to children, adolescents and similar population groups in Mexico.

However, our work also presents a number of strengths. First, our findings provide a significant contribution to the limited research available on the relationship between HFI and the nutritional status of mother-child pairs. Second, this is a pioneering study in the field, dealing specifically with the Mexican population. Third, our large sample size allowed us to introduce possible confounding variables in our statistical models and draw conclusions at the national level. Finally, we identified a phenomenon which is distinctive of the ongoing nutritional transition in Mexico, and is also common to numerous other countries in the world: the double burden of malnutrition in food insecure households.

Our study documents an interesting interaction between HFI and maternal obesity on the one hand and the risk of childhood stunting on the other. This finding could be useful to those who design and implement strategies for improving the health and nutritional status of vulnerable populations. Evidence from our research can serve to craft novel approaches within households suffering from food insecurity, that is, strategies that respond to the needs of people afflicted by overweight/obesity and children with malnutrition.

## Introduction

## Background

Food security “exists when all people, at all times, have physical, social and economic access to sufficient, safe and nutritious food which meets their dietary needs and food preferences for an active and healthy life, and is supported by an environment of adequate sanitation, health services and care” [1, 2].

The term hunger refers both to a feeling of discomfort from not eating and to the state of undernutrition, particularly within the context of food insecurity (FI) [3]. Experience-based indices can serve to assess hunger directly at the household level [4].

Household Food Insecurity (HFI) has been defined as “limited or uncertain availability of nutritionally adequate and safe food and also as limited and uncertain ability to acquire adequate food in socially acceptable ways” [5].

FI is a growing concern worldwide. It is estimated that over one billion people suffer from insufficient availability of dietary energy, and at least twice that number suffer from micronutrient deficiency [6].

FI in Mexico has evolved within a complex and contrasting environment where undernutrition and overweight/obesity, together, form part of an advanced nutritional transition characterized by widespread HFI. One out of three Mexican households suffers from moderate or severe FI. This condition heightens not only

1  
2  
3 the risk of malnutrition in children, but also the incidence of diabetes, overweight  
4 and obesity in adults, principally among women [7].  
5  
6  
7

8  
9 Recent studies have suggested a link between HFI and obesity [8], especially in  
10 adult women [9-11]. For instance, it has been documented that women with FI are  
11 more likely to suffer from obesity than women without FI [12]. It has also been  
12 reported that racial/ethnic minority communities and low-income households are  
13 the population groups most severely affected by HFI [13].  
14  
15  
16  
17  
18  
19

20  
21 Generally viewed as separate public health problems, there is growing concern  
22 that FI and obesity may be related. FI can lead to weight gain because high-fat,  
23 high-calorie and energy-dense foods offer the least expensive option for obtaining  
24 calories [14], and these products, available at lower prices than healthful foods  
25 [15], have been identified as risk factors for child and adult obesity [16].  
26 Furthermore, HFI can trigger disorderly eating patterns characterized by bingeing  
27 and restricted eating, depending on the availability of supplies, thus negatively  
28 affecting the body's metabolism [17].  
29  
30  
31  
32  
33  
34  
35  
36  
37  
38  
39

40  
41 Recent decades have witnessed alarming increases in prevalence of  
42 overweight/obesity among Mexican children: from 7.8% in 1988 to 9.7% in 2012 for  
43 children under five; from 26.9% in 1999 to 34.4% in 2012 for 5-11-year olds; and  
44 from 11.1% in 1988 to 35.8% in 2012 for female adolescents aged 12-19 years. In  
45 the adult population aged 20 and older, prevalence jumped from 61.8% to 71.3% in  
46 twelve years [18].  
47  
48  
49  
50  
51  
52  
53  
54  
55  
56  
57  
58  
59  
60



1  
2  
3 In 2012, children under five living in severe-FI households indicated 42% higher  
4 risk of stunting or chronic malnutrition than did their counterparts living in food  
5 secure households [19]. That same year women aged 20 to 59 had an average  
6 BMI of 28.9. More specifically, those living in mild, moderate and severe HFI had  
7 BMIs of 28.3, 29.3 and 29.4, respectively ( $p<0.001$ ,  $p=0.011$  and  $p=0.007$ ,  
8 respectively) [11].  
9

10  
11  
12  
13  
14  
15  
16  
17  
18 The double burden of malnutrition can occur not only within the same country, city  
19 or household (mother-child pairs), but also within the same individual at different  
20 stages of his or her life [20]. The fact that HFI may be associated with both  
21 undernutrition and obesity has been documented [17].  
22

23  
24  
25  
26  
27  
28  
29 The twofold purpose of this article is to examine the association between HFI and  
30 risk of childhood stunting, and to determine whether this association is modified by  
31 maternal-child overweight/obesity.  
32  
33

## 34 35 36 **Methods**

### 37 38 39 *Study population*

40  
41  
42  
43 Data were drawn from *ENSANUT 2012*, a cross-sectional, probabilistic and cluster  
44 survey with national, regional, urban-rural and state-level representativity.  
45  
46  
47  
48  
49  
50  
51  
52  
53  
54  
55  
56  
57  
58  
59  
60  
Oversampling was directed to Mexican households of lower socioeconomic status.  
A sample of 50,528 households of an estimated 29,429,252 households  
nationwide was obtained between October 2011 and May 2012. Details of sample  
size and design have been described elsewhere [21].

1  
2  
3 Our study consisted of a secondary analysis based on *ENSANUT 2012*. A total of  
4  
5 5,087 preschool children (1-4y), 8,401 schoolchildren (5-11y) and 9,581 mothers  
6  
7 were included in the survey. We used a matching process to identify mother-  
8  
9 preschool child and mother-schoolchild pairs, and included a total of 5,087 mother-  
10  
11 preschool child pairs in our analysis. None of the mothers in this group had more  
12  
13 than one child. A total of 7,181 mother-schoolchild pairs were included, with 2,432  
14  
15 mothers having more than one schoolchild, in which cases only one schoolchild  
16  
17 was used in the matching process. Finally, the 2,677 mothers in the sample who  
18  
19 had preschool children and schoolchildren were included in both pair groups.  
20  
21  
22  
23

24  
25 Our analytical sample included 5,087 mother-preschool child pairs and 7,181  
26  
27 mother-schoolchild pairs with complete data. Where mothers had more than one  
28  
29 schoolchild meeting the study criteria, analysis considered all their children.  
30  
31  
32

33 Informed consent was obtained from all respondents – or their parents/guardians in  
34  
35 cases of children under seven years – prior to their participation in the study. The  
36  
37 survey protocol was approved by the Ethics Committee of the National Institute of  
38  
39 Public Health in Mexico.  
40  
41  
42

#### 43 *HFI measurement*

44  
45  
46 HFI was measured using a version of the Latin American and Caribbean Food  
47  
48 Security Scale (*ELCSA* by its initials in Spanish). The scale included 15 questions  
49  
50 targeting the head of the family or the woman in charge of preparing meals. Eight  
51  
52 questions referred directly to HFI either in the household or specifically in the  
53  
54 adults within the household; the remaining seven referred to HFI in minors (<18y).  
55  
56  
57  
58  
59  
60

1  
2  
3 The reference time frame was three months prior to survey administration. Based  
4  
5 on the number of positive responses, and depending on whether or not households  
6  
7 included people under 18, they were grouped into the following categories:  
8  
9 households with no HFI (0 positive responses), mild HFI (1 to 3), moderate HFI (4  
10  
11 to 6), and severe HFI (7 to 8); and households with adults and minors under 18: no  
12  
13 HFI (0 positive responses), mild HFI (1 to 5), moderate HFI (6 to 10), and severe  
14  
15 HFI (11 to 15)[22]. The ELCSA has been validated in populations in the United  
16  
17 States as well as in Mexico and other Latin American countries [23-25].  
18  
19  
20  
21  
22

### 23 *Anthropometric measurements*

24  
25  
26 Weight and recumbent length measures were obtained from children < 2 and  
27  
28 standing height measures from children aged 2 to < 5 following standard  
29  
30 recommended procedures [26,27].  
31  
32  
33

34 The anthropometric measures together with the age and sex of the children were  
35  
36 used to calculate the weight-for-age, height-for-age, and weight-for-height z-scores  
37  
38 according to the WHO growth standards [28]. Prevalence of undernutrition in its  
39  
40 different forms (underweight, wasting and stunting) was calculated using the < -2 z-  
41  
42 score cut-off point using the WHO growth standards.  
43  
44  
45

46  
47 Overweight and obesity were determined according to the WHO Growth Reference  
48  
49 charts [29], with BMI ( $\text{kg}/\text{m}^2$ ) z-scores adjusted for age: values between -5.0 and  
50  
51 +5.0 were considered outside this range and regarded as implausible. There were  
52  
53 no implausible values for BMI z-scores in children. For adults, the WHO standard  
54  
55 BMI cut-off points were used to classify mothers into the following categories:  
56  
57  
58  
59  
60

1  
2  
3 underweight ( $<18.5 \text{ kg/m}^2$ ), normal weight ( $18.5$  to  $24.9 \text{ kg/m}^2$ ), overweight ( $25$ -  
4  $29.9 \text{ kg/m}^2$ ) and obese ( $\geq 30 \text{ kg/m}^2$ ) [30]. Only BMI values between 10 and 58 were  
5  
6 considered; no BMI values were regarded as implausible.  
7  
8

### 9 10 11 *Covariates*

12  
13  
14 The following covariates were included in our statistical analyses: sex of the child,  
15 urbanicity (urban/rural), region of residence (northern, central, southern and  
16 Mexico City), and maternal education: none, primary, secondary, high school  
17 (*preparatoria* according to its Spanish equivalent) and university (bachelor's degree  
18 and beyond). Benefiting from a food assistance program was also included.  
19  
20  
21  
22  
23  
24  
25  
26

### 27 *Socioeconomic Index*

28  
29  
30 We used a standard socioeconomic status (SES) index developed in Mexico on  
31 the basis of various household characteristics: type of floor, wall and ceiling  
32 materials; the ratio of number of rooms used for sleeping to number of persons  
33 residing in the household; basic service infrastructure including water source and  
34 water disposal; and possession of domestic appliances such as a refrigerator,  
35 washing machine, microwave oven, stove, boiler, radio, television, cable television  
36 signal, telephone and computer. This SES index was selected to facilitate  
37 comparison with previous surveys in Mexico [31].  
38  
39  
40  
41  
42  
43  
44  
45  
46  
47  
48

### 49 *Ethical considerations*

50  
51  
52  
53 All study procedures involving human participants were approved by the Ethics  
54 Committee of the National Institute of Public Health in Mexico. Written informed  
55  
56  
57  
58  
59  
60

1  
2  
3 consent was obtained from all survey participants. Parents/guardians served as  
4  
5 proxies for minors < 7 years.  
6  
7

### 8 9 *Statistical analyses*

10  
11 We calculated the prevalence (95% CI) of each HFI category by socioeconomic  
12  
13 characteristic and maternal-child nutritional status. We then conducted logistic  
14  
15 regression models for stunting and overweight among preschool children and for  
16  
17 stunting and overweight/obesity among schoolchildren, adjusting for pertinent  
18  
19 covariates. The cluster effect for mothers with more than one schoolchild was  
20  
21 tested and proved non-significant. No mothers had more than one preschool child.  
22  
23 Results were expressed as Adjusted Odds Ratios (AORs) with their corresponding  
24  
25 95% confidence intervals. Prevalence estimates and logistic regression models  
26  
27 considered clustered sample effects and sampling weights using STATA 13 SVY  
28  
29 procedures for complex surveys.  
30  
31  
32  
33  
34  
35

### 36 37 **Results**

38  
39 Our analytical sample included 5,087 pairs of mother-preschool children and 7,181  
40  
41 mother-schoolchild pairs with complete data.  
42  
43

44  
45 In the mother-preschool child pairs, moderate HFI was significantly more prevalent  
46  
47 among those residing in the southern, as opposed to the northern or central,  
48  
49 regions of Mexico. As expected, severe HFI was five and six times more prevalent  
50  
51 in the low and very low quintiles, respectively, than in the top quintile. Moderate  
52  
53 and severe HFI were more prevalent in households with mothers who had not  
54  
55  
56  
57  
58  
59  
60

studied beyond junior high school, and with beneficiaries of government food-assistance programs (Table 1).

Similarly, in the mother-schoolchild pairs, general HFI was more prevalent among those living in southern Mexico than among those living in the north. In addition, HFI was higher in the low and very low socioeconomic quintiles. Prevalence of moderate and severe HFI was significantly higher among those pairs where the mothers had not studied beyond junior high school, benefited from government food-assistance programs and belonged to an indigenous population group (Table 1).

**Table 1. FI level according to the socio-demographic characteristics of the mother-preschool child and mother-schoolchild pairs**

|                           | Total<br>n | N*<br>(thousands) | Food Insecurity Level in preschool children |              |      |             |          |             |        |             |
|---------------------------|------------|-------------------|---------------------------------------------|--------------|------|-------------|----------|-------------|--------|-------------|
|                           |            |                   | Secure                                      |              | Mild |             | Moderate |             | Severe |             |
|                           |            |                   | %                                           | 95% CI       | %    | 95% CI      | %        | 95% CI      | %      | 95% CI      |
| <b>Sex of child</b>       |            |                   |                                             |              |      |             |          |             |        |             |
| Female                    | 2539       | 1452.9            | 24.2                                        | (21.7,26.79) | 43.8 | (40.9,46.6) | 21.6     | (19.5,23.8) | 10.5   | (9.0,12.2)  |
| Male                      | 2548       | 1522.1            | 24.7                                        | (22.3,27.13) | 45.0 | (42.4,47.7) | 18.4     | (16.5,20.6) | 11.9   | (10.3,13.8) |
| <b>Urbanicity</b>         |            |                   |                                             |              |      |             |          |             |        |             |
| Urban                     | 3142       | 2123.0            | 26.8                                        | (24.6,29.1)  | 43.3 | (40.9,45.8) | 18.9     | (17.1,20.9) | 10.9   | (9.4,12.6)  |
| Rural                     | 1945       | 851.9             | 18.5                                        | (16.3,20.9)  | 47.0 | (43.8,50.2) | 22.4     | (20.1,25.0) | 12.0   | (10.3,14.1) |
| <b>Region</b>             |            |                   |                                             |              |      |             |          |             |        |             |
| Northern Mexico           | 1083       | 524.5             | 30.5                                        | (27.2,34.0)  | 42.5 | (38.9,46.2) | 15.8     | (13.3,18.6) | 11.2   | (9.2,13.5)  |
| Central Mexico            | 1804       | 941.8             | 26.7                                        | (24.0,29.6)  | 45.3 | (42.2,48.4) | 17.4     | (15.1,20.0) | 10.6   | (8.8,12.6)  |
| City                      | 200        | 426.5             | 22.1                                        | (15.6,30.4)  | 45.5 | (37.9,53.4) | 21.9     | (16.3,28.8) | 10.5   | (6.3,16.9)  |
| Southern                  | 2000       | 1082.2            | 20.4                                        | (18.1,22.8)  | 44.1 | (41.1,47.1) | 23.4     | (21.2,25.9) | 12.1   | (10.3,14.2) |
| <b>SES</b>                |            |                   |                                             |              |      |             |          |             |        |             |
| Very Low (Q1)             | 1319       | 666.0             | 12.4                                        | (9.9,15.4)   | 45.8 | (41.9,49.6) | 23.8     | (20.8,27.1) | 18.0   | (15.1,21.4) |
| Low (Q2)                  | 1187       | 629.8             | 17.6                                        | (15.0,20.6)  | 43.4 | (39.3,47.7) | 25.1     | (21.5,29.2) | 13.8   | (11.2,16.9) |
| Medium (Q3)               | 1028       | 584.5             | 20.0                                        | (17.1,23.4)  | 48.4 | (44.8,52.1) | 20.3     | (17.3,23.8) | 11.1   | (8.7,14.2)  |
| High (Q4)                 | 879        | 575.7             | 29.1                                        | (25.1,33.5)  | 44.2 | (39.7,48.7) | 18.5     | (15.1,22.4) | 8.2    | (6.2,10.8)  |
| Very High (Q5)            | 674        | 519.0             | 47.7                                        | (42.3,53.2)  | 39.5 | (34.4,44.7) | 10.0     | (7.2,13.6)  | 2.8    | (1.8,4.6)   |
| <b>Maternal Education</b> |            |                   |                                             |              |      |             |          |             |        |             |
| None                      | 349        | 196.4             | 10.0                                        | (6.8,14.4)   | 40.6 | (34.2,47.4) | 24.7     | (19.4,30.9) | 24.7   | (18.9,31.5) |

|                                                  |                |                       |          |                      |          |                    |          |                        |          |                      |
|--------------------------------------------------|----------------|-----------------------|----------|----------------------|----------|--------------------|----------|------------------------|----------|----------------------|
| Primary and/or secondary school                  | 3568           | 1951.6                | 19.1     | (17.4,20.9)          | 46.1     | (43.7,48.5)        | 21.5     | (19.6,23.6)            | 13.3     | (11.8,15.1)          |
| Beyond secondary school                          | 1165           | 823.0                 | 40.4     | (36.4,44.6)          | 41.4     | (37.6,45.3)        | 15.1     | (12.5,18.1)            | 3.0      | (2.0,4.6)            |
| <b>Beneficiaries of Food Assistance Programs</b> |                |                       |          |                      |          |                    |          |                        |          |                      |
| Beneficiaries                                    | 2246           | 1187.1                | 15.7     | (13.6,18.1)          | 45.8     | (42.7,48.8)        | 24.5     | (22.1,27.1)            | 14.0     | (12.0,16.3)          |
| Non-beneficiaries                                | 2400           | 1520.1                | 30.2     | (27.6,33.0)          | 43.8     | (41.1,46.6)        | 16.9     | (14.9,19.1)            | 9.0      | (7.6,10.8)           |
| <b>Indigenous</b>                                |                |                       |          |                      |          |                    |          |                        |          |                      |
| Yes                                              | 101            | 1150.9                | 20.3     | (11.7,32.8)          | 38.3     | (27.8,50.1)        | 29.5     | (20.1,40.9)            | 12.0     | (6.4,21.2)           |
| No                                               | 1906           | 41.9                  | 23.5     | (21.2,25.9)          | 44.1     | (41.2,47.1)        | 20.3     | (18.0,22.9)            | 12.0     | (9.9,14.3)           |
| <b>Food Insecurity Level in schoolchildren</b>   |                |                       |          |                      |          |                    |          |                        |          |                      |
|                                                  | <b>Total n</b> | <b>N* (thousands)</b> | <b>%</b> | <b>Secure 95% CI</b> | <b>%</b> | <b>Mild 95% CI</b> | <b>%</b> | <b>Moderate 95% CI</b> | <b>%</b> | <b>Severe 95% CI</b> |
| <b>Sex of child</b>                              |                |                       |          |                      |          |                    |          |                        |          |                      |
| Female                                           | 4269           | 2413.0                | 23.1     | (21.3,25.1)          | 42.3     | (40.4,44.3)        | 20.1     | (18.4,22.0)            | 14.4     | (12.9,15.9)          |
| Male                                             | 4132           | 2337.1                | 24.0     | (21.9,26.2)          | 43.6     | (41.3,45.9)        | 19.8     | (18.1,21.6)            | 12.6     | (11.1,14.2)          |
| <b>Urbanicity</b>                                |                |                       |          |                      |          |                    |          |                        |          |                      |
| Urban                                            | 5267           | 3444.7                | 26.2     | (24.3,28.1)          | 42.0     | (39.9,43.9)        | 18.4     | (16.8,20.1)            | 13.5     | (12.1,15.1)          |
| Rural                                            | 3134           | 1306.3                | 16.7     | (14.8,18.8)          | 45.8     | (43.2,48.3)        | 24.2     | (22.1,26.4)            | 13.4     | (11.8,15.3)          |
| <b>Region</b>                                    |                |                       |          |                      |          |                    |          |                        |          |                      |
| Northern Mexico                                  | 1796           | 884.6                 | 29.5     | (26.4,32.8)          | 42.3     | (39.2,45.4)        | 16.2     | (13.9,18.8)            | 12.0     | (10.2,14.2)          |
| Central Mexico                                   | 2928           | 1446.1                | 25.8     | (23.2,28.5)          | 45.1     | (42.3,47.9)        | 16.8     | (14.8,19.0)            | 12.3     | (10.6,14.2)          |
| City                                             | 353            | 717.3                 | 25.6     | (20.4,31.7)          | 36.2     | (30.4,42.4)        | 21.6     | (16.7,27.5)            | 16.6     | (12.0,22.3)          |
| Southern                                         | 3324           | 1738.9                | 18.0     | (16.2,19.9)          | 44.2     | (42.1,46.5)        | 23.8     | (21.8,25.9)            | 14.0     | (12.4,15.7)          |
| <b>SES</b>                                       |                |                       |          |                      |          |                    |          |                        |          |                      |
| Very Low (Q1)                                    | 1977           | 980.7                 | 9.6      | (7.9,11.6)           | 42.5     | (39.1,46.1)        | 26.2     | (23.3,29.4)            | 21.7     | (18.7,25.1)          |
| Low (Q2)                                         | 1874           | 947.06                | 15.0     | (12.9,17.5)          | 39.6     | (36.3,42.9)        | 25.5     | (22.4,28.9)            | 19.9     | (17.1,22.9)          |
| Medium (Q3)                                      | 1717           | 914.6                 | 16.0     | (13.6,18.7)          | 50.5     | (46.8,54.2)        | 19.7     | (17.1,22.6)            | 13.9     | (11.5,16.6)          |
| High (Q4)                                        | 1583           | 995.9                 | 29.8     | (26.4,33.4)          | 43.8     | (40.4,47.2)        | 17.4     | (14.7,20.5)            | 9.05     | (7.3,11.1)           |
| Very High (Q5)                                   | 1250           | 912.7                 | 48.2     | (43.8,52.7)          | 38.5     | (34.7,42.4)        | 10.7     | (8.0,14.1)             | 2.6      | (1.6,4.4)            |
| <b>Maternal Education</b>                        |                |                       |          |                      |          |                    |          |                        |          |                      |
| None                                             | 651            | 339.1                 | 13.4     | (10.0,17.7)          | 40.9     | (35.8,46.2)        | 21.6     | (17.6,26.1)            | 24.1     | (19.5,29.5)          |
| Primary and/or secondary school                  | 5970           | 3212.5                | 18.7     | (17.2,20.3)          | 44.0     | (41.9,45.9)        | 22.0     | (20.4,23.7)            | 15.4     | (13.9,16.9)          |
| Beyond secondary school                          | 1780           | 1199.4                | 39.5     | (35.9,43.1)          | 41.0     | (37.8,44.4)        | 14.1     | (11.8,16.8)            | 5.4      | (4.2,6.9)            |
| <b>Beneficiaries of Food Assistance Programs</b> |                |                       |          |                      |          |                    |          |                        |          |                      |
| Beneficiaries                                    | 4527           | 2362.1                | 16.5     | (14.9,18.2)          | 44.9     | (42.5,47.3)        | 22.2     | (20.5,24.1)            | 16.4     | (14.6,18.4)          |
| Non-beneficiaries                                | 3299           | 2032.0                | 30.8     | (28.2,33.4)          | 41.6     | (39.1,44.1)        | 17.4     | (15.4,19.6)            | 10.2     | (8.8,11.9)           |
| <b>Indigenous</b>                                |                |                       |          |                      |          |                    |          |                        |          |                      |
| Yes                                              | 595            | 228.1                 | 10.8     | (8.0,14.3)           | 44.4     | (39.2,49.8)        | 26.1     | (21.8,30.9)            | 18.7     | (14.7,23.5)          |
| No                                               | 7806           | 4522.9                | 24.2     | (22.7,25.8)          | 42.9     | (41.2,44.5)        | 19.7     | (18.3,21.1)            | 13.2     | (12.1,14.5)          |

\* N refers to the sample population size.

1  
2  
3  
4 Table 2 describes the nutritional status of the population by household food  
5 security/insecurity level. Stunting in preschool children was more prevalent in  
6  
7 households with severe/moderate HFI (over 16% respectively) than in those with  
8  
9 mild (13.2%) or no HFI (10.7%). Likewise, wasting was more prevalent in  
10  
11 households with severe (3.7%) than in those with mild (1.7%), moderate (1.9%) or  
12  
13 no HFI (2.2%).  
14  
15  
16  
17  
18

19 Preschool children presented no significant differences in prevalence of overweight  
20  
21 by HFI level.  
22  
23

24  
25 While prevalence of stunting among schoolchildren was 10% in households with  
26  
27 severe HFI, prevalence of overweight/obesity was markedly higher in households  
28  
29 with food security (40%) as compared to households with mild (34.5%), moderate  
30  
31 (32.1%) or severe (28.6%) HFI. Prevalence of maternal obesity was high  
32  
33 regardless of HFI status: > 70% overall and 77% in mild HFI households.  
34  
35  
36  
37  
38  
39  
40  
41  
42  
43  
44  
45  
46  
47  
48  
49  
50  
51  
52  
53  
54  
55  
56  
57  
58  
59  
60



Table 2. Prevalence of nutritional status by level of food insecurity

| Nutritional status | Food Security         |      |            | Food Insecurity in Preschool Children |      |             |                       |      |             |                       |      |             |
|--------------------|-----------------------|------|------------|---------------------------------------|------|-------------|-----------------------|------|-------------|-----------------------|------|-------------|
|                    | N*<br>(thousand<br>s) | %    | (95% CI)   | Mild                                  |      |             | Moderate              |      |             | Severe                |      |             |
|                    |                       |      |            | N*<br>(thousan<br>ds)                 | %    | (95% CI)    | N*<br>(thousa<br>nds) | %    | (95% CI)    | N*<br>(thousan<br>ds) | %    | (95% CI)    |
| Underweight(1)     | 8.3                   | 1.1  | (0.6,2.1)  | 40.6                                  | 3.0  | (2.3,4.1)   | 18.8                  | 3.1  | (2.2,4.6)   | 15.8                  | 4.7  | (2.7,8.1)   |
| Stunting(2)        | 77.6                  | 10.7 | (8.6,13.2) | 175.4                                 | 13.2 | (11.4,15.4) | 96.2                  | 16.2 | (13.1,19.8) | 56.0                  | 16.8 | (12.8,21.6) |
| Wasting(3)         | 15.8                  | 2.2  | (1.1,4.1)  | 23.1                                  | 1.7  | (1.0,2.8)   | 11.1                  | 1.9  | (1.1,3.1)   | 12.5                  | 3.7  | (2.0,6.9)   |
| Overweight(4)      | 75.9                  | 11.0 | (8.8,13.5) | 120.7                                 | 9.7  | (8.2,11.5)  | 47.6                  | 8.3  | (6.1,11.2)  | 31.5                  | 9.6  | (6.8,13.3)  |

  

| Nutritional status        | Food Security         |      |             | Food Insecurity in Schoolchildren |      |             |                       |      |             |                       |      |             |
|---------------------------|-----------------------|------|-------------|-----------------------------------|------|-------------|-----------------------|------|-------------|-----------------------|------|-------------|
|                           | N*<br>(thousand<br>s) | %    | (95% CI)    | Mild                              |      |             | Moderate              |      |             | Severe                |      |             |
|                           |                       |      |             | N*<br>(thousan<br>ds)             | %    | (95% CI)    | N*<br>(thousa<br>nds) | %    | (95% CI)    | N*<br>(thousan<br>ds) | %    | (95% CI)    |
| Stunting(2)               | 48.4                  | 4.4  | (3.3,5.8)   | 128.7                             | 6.4  | (5.4,7.4)   | 75.8                  | 8.0  | (6.3,10.3)  | 64.2                  | 10.1 | (7.9,12.7)  |
| Overweight(5)             | 250.4                 | 23.0 | (20.4,25.7) | 377.2                             | 18.9 | (17.2,20.8) | 161.3                 | 17.4 | (15.1,19.9) | 112.5                 | 17.8 | (14.9,21.0) |
| Obesity(4)                | 190.6                 | 17.5 | (15.1,20.2) | 310.8                             | 15.6 | (14.0,17.3) | 136.4                 | 14.7 | (12.5,17.3) | 68.6                  | 10.8 | (8.3,14.0)  |
| Overweight and<br>Obesity | 441.0                 | 40.4 | (37.3,43.7) | 688.0                             | 34.5 | (32.3,36.8) | 297.7                 | 32.1 | (28.9,35.5) | 181.1                 | 28.6 | (24.8,32.6) |

  

| Nutritional status        | Food Security         |      |             | Food Insecurity in Women |      |             |                       |      |             |                       |      |             |
|---------------------------|-----------------------|------|-------------|--------------------------|------|-------------|-----------------------|------|-------------|-----------------------|------|-------------|
|                           | N*<br>(thousand<br>s) | %    | (95% CI)    | Mild                     |      |             | Moderate              |      |             | Severe                |      |             |
|                           |                       |      |             | N*<br>(thousan<br>ds)    | %    | (95% CI)    | N*<br>(thousa<br>nds) | %    | (95% CI)    | N*<br>(thousan<br>ds) | %    | (95% CI)    |
| Underweight(6)            | 20.9                  | 1.2  | (0.6,2.1)   | 22.7                     | 0.69 | (0.5,0.9)   | 19.1                  | 1.2  | (0.6,2.5)   | 12.9                  | 1.3  | (0.8,2.3)   |
| Overweight(7)             | 683.5                 | 37.9 | (35.1,40.7) | 1301.7                   | 39.8 | (37.7,41.9) | 563.9                 | 37.2 | (33.9,40.8) | 344.7                 | 35.6 | (31.9,39.5) |
| Obesity(8)                | 589.9                 | 32.7 | (29.9,35.5) | 1206.9                   | 36.9 | (34.9,38.9) | 584.1                 | 38.6 | (35.3,41.9) | 365.7                 | 37.8 | (33.6,42.3) |
| Overweight and<br>Obesity | 1273.4                | 70.5 | (67.7,73.3) | 2508.7                   | 76.7 | (74.8,78.6) | 1148.0                | 75.9 | (73.1,78.4) | 710.4                 | 73.5 | (69.8,76.8) |

\* N refers to the sample population size.

(1) Z-score cut-off point of <-2 standard deviations to classify low weight-for-age, WHO

(2) Z-score cut-off point of <-2 standard deviations to classify low height-for-age, WHO

(3) Z-score cut-off point of <-2 standard deviations to classify low weight-for-height-, WHO

(4) Z-score cut-off point of >+2 standard deviations to classify body mass index (BMI)-for-age, WHO

1  
2  
3  
4  
5  
6  
7  
8  
9  
10  
11  
12  
13  
14  
15  
16  
17  
18  
19  
20  
21  
22  
23  
24  
25  
26  
27  
28  
29  
30  
31  
32  
33  
34  
35  
36  
37  
38  
39  
40  
41  
42  
43  
44  
45  
46  
47  
48  
49

- (5) Z-score cut-off point of  $>+1$  and  $\leq+2$  standard deviations to classify body mass index (BMI)-for-age, WHO
- (6) BMI  $<18.5$  kg/m<sup>2</sup>
- (7) BMI 25-29.9 kg/m<sup>2</sup>
- (8) BMI  $\geq 30$  kg/m<sup>2</sup>

For peer review only

In the logistic regression model for preschool children, prevalence of stunting was significantly higher (AOR>1, p<0.05) in households with moderate or severe HFI as opposed to mild HFI (Table 3).

**Table 3. Logistic regression model for mother-preschool child pairs: Stunting in children < 5 years old**

|                                            | AOR*  | p-value | 95% CI     |
|--------------------------------------------|-------|---------|------------|
| Mild HFI                                   | 1.261 | 0.232   | (0.9,1.8)  |
| Moderate HFI                               | 1.663 | 0.036   | (1.0, 2.7) |
| Severe HFI                                 | 1.993 | 0.007   | (1.2,3.3)  |
| Maternal obesity                           | 1.402 | 0.266   | (0.8,2.5)  |
| Mild HFI and maternal obesity              | 0.622 | 0.207   | (0.3,1.3)  |
| Moderate HFI and maternal obesity          | 0.463 | 0.069   | (0.2,1.1)  |
| Severe HFI and maternal obesity            | 0.219 | 0.011   | (0.1,0.7)  |
| Age of children                            | 0.889 | 0.007   | (0.8,0.9)  |
| Beneficiaries of food assistance programs  | 1.239 | 0.119   | (0.9,1.6)  |
| <b>Urbanicity</b>                          |       |         |            |
| Rural                                      | 1.421 | 0.006   | (1.1,1.8)  |
| <b>Maternal Education</b>                  |       |         |            |
| Primary school                             | 0.534 | <0.001  | (0.4,0.8)  |
| Secondary school                           | 0.465 | 0.001   | (0.3,0.7)  |
| Senior high school ( <i>Preparatoria</i> ) | 0.342 | <0.001  | (0.2,0.6)  |
| Bachelor or higher                         | 0.481 | 0.042   | (0.2,0.9)  |
| Const                                      | 0.256 | 0.000   | (0.2,0.4)  |

\*Model included all independent variables listed in the table.

We identified an interaction between HFI and maternal obesity. Estimated marginal prevalence rates and confidence intervals obtained from the logistic regression model are plotted in Figure 1. Severe HFI raises the risk of stunting in children with non-obese mothers but not in children with obese mothers. Preschool children showed no significant interaction between HFI, overweight and maternal characteristics.

For schoolchildren, the logistic regression model revealed a significantly lower prevalence of overweight and obesity among those with mild, moderate or severe HFI ( $p < 0.05$ ) (Table 4), mothers having higher levels of education (bachelor's and beyond) ( $p < 0.001$ ), and residence in rural areas ( $p = 0.007$ ).

The logistic regression model for stunting in schoolchildren documented significant associations of this condition with maternal characteristics but not with HFI (data not shown).

**Table 4. Logistic regression model for mother-schoolchild pairs: both mother and child with overweight/obesity: Overweight and obesity in schoolchildren**

|                                            | AOR* | p-value | 95% CI      |
|--------------------------------------------|------|---------|-------------|
| Mild HFI                                   | 0.79 | 0.017   | (0.6,0.9)   |
| Moderate HFI                               | 0.72 | 0.005   | (0.57,0.90) |
| Severe HFI                                 | 0.67 | 0.004   | (0.51,0.9)  |
| Maternal Overweight                        | 2.25 | <0.001  | (1.8,2.8)   |
| Maternal Obesity                           | 3.96 | <0.001  | (3.3,4.8)   |
| Age of child                               |      |         |             |
|                                            | 1.12 | <0.001  | (1.1,1.2)   |
| Beneficiaries of food assistance programs  | 0.85 | 0.039   | (0.7,0.9)   |
| <b>Urbanicity</b>                          |      |         |             |
| Rural                                      | 0.79 | 0.007   | (0.7,0.9)   |
| <b>Maternal Education</b>                  |      |         |             |
| Primary school                             | 0.87 | 0.342   | (0.6,1.2)   |
| Secondary school                           | 1.11 | 0.484   | (0.8,1.5)   |
| Senior high school ( <i>Preparatoria</i> ) | 1.12 | 0.485   | (0.8,1.6)   |
| Bachelor or higher                         | 1.93 | <0.001  | (1.3,2.9)   |
| Const                                      | 0.12 | 0.000   | (0.1,0.2)   |

\*Model included all independent variables listed in table.

## Discussion

We sought to describe the nutritional status of <11-year-old-children and their mothers, and to explore the relationship between their nutritional status and HFI. One of the strengths of this study concerns the fact that our research sample was representative of the Mexican population.

Many countries are witnessing an increase in the prevalence of adult overweight while still struggling with childhood stunting. Our study found that moderate and severe HFI were associated with low height in children who were under five and lived with mothers with overweight or obesity. Similar results have been obtained by other studies on the double burden of malnutrition, where stunted children live with overweight mothers in the same, and particularly in poor, households [32-33]. The problem has been analyzed at the household and individual levels both globally and within a number of countries, Mexico among them [34].

Studies conducted in the Latin American and Arctic regions have demonstrated that FI households exhibit not only a reduced variety of available food, but also inadequate consumption of fruits and vegetables [35] and foods of animal origin [36-37]. These findings have been explained by insufficient local food availability as well as the presence of inferior-quality, high-cost foods, both of which favor the choice of widely available cheaper foods of low nutritional value [38]. It has been reported that FI in Mexico has similar effects to those observed in the rest of Latin America as regards dietary diversity and food availability. Mexican children under five are not receiving the recommended daily energy intake [39] and female heads of household show diminished dietary diversity [40].

1  
2  
3 Evidence from a study of < 5 children of Mexican origin living in immigrant  
4 communities in California and in Mexico itself underscores the fact that FI  
5 contributes not only to increased energy and fat intake as a result of consuming  
6 cheap and energy-rich foods such as snacks, sweets and fried foods, but also to  
7 increased consumption of meat, especially fried chicken. For children living in  
8 Mexico, FI was associated with low consumption of carbohydrates, dairy products  
9 and vitamin B6 [41].  
10

11  
12 The pathway through which FI can lead to an increase in body fat is based on the  
13 following factors: (1) Diets characterized by high quantities of fat and  
14 carbohydrates together with a limited variety of vegetables are associated with high  
15 energy intake and a subsequent increase in body fat [42,43]. (2) According to one  
16 hypothesis, involuntary restriction of food including episodic lack of access can  
17 lead to compulsive eating and to ignoring internal signs of satiety [44], as well as to  
18 physiological adaptations in response to the periodic scarcity of food [17].  
19

20  
21 Conversely, our study demonstrated an association between FI and stunting  
22 among Mexican preschool children. The way in which FI negatively affects the  
23 nutritional state of these children relates largely to insufficient consumption of  
24 highly nutritious foods (such as products of animal origin, fruits and vegetables)  
25 coupled with recurrent infections and unhealthy living conditions linked to poverty.  
26 These factors contribute to loss of appetite, an increase in metabolic requirements  
27 and a deficit of nutrients [45].  
28

29  
30 Our results agree with those of a previous study where children from HFI  
31 households weighed less than their peers from food-secure households. Their  
32  
33  
34  
35  
36  
37  
38  
39  
40  
41  
42  
43  
44  
45  
46  
47  
48  
49  
50  
51  
52  
53  
54  
55  
56  
57  
58  
59  
60

1  
2  
3 average body weight was within the normal range, whereas their peers were at risk  
4  
5 of becoming overweight.  
6  
7

8  
9 Adequate growth is not the only indicator of nutritional well-being among children  
10  
11 living with HFI [36]. Nutritional status is also influenced by the quality of foods  
12  
13 consumed. It has been demonstrated that obesity is an expected consequence of  
14  
15 HFI for some subpopulations and at certain ages. Moreover, it has been shown  
16  
17 that children and adolescents are often affected by HFI through both nutritional and  
18  
19 non-nutritional pathways despite parental intentions or beliefs to the contrary [46].  
20  
21  
22  
23

24 A recent analysis of 16 Latin American countries revealed that all of them were  
25  
26 running programs aimed at preventing undernutrition, and most were in the  
27  
28 process of implementing obesity prevention strategies as part of their policy  
29  
30 agendas [47]. According to the literature, cash transfers and food distribution  
31  
32 programs may be triggering increased energy intake at the household level [48,49]  
33  
34 and exacerbating the HFI-obesity link in populations that do not need assistance  
35  
36 programs focused on caloric intake. This has raised concerns about the possible  
37  
38 contribution of these programs to obesity in populations who are not energy  
39  
40 deficient, and highlights the need for countries with a double burden of malnutrition  
41  
42 to include obesity prevention strategies as an essential component of their cash  
43  
44 and food transfer programs.  
45  
46  
47  
48

49  
50 The principal findings of our study are particularly relevant for countries undergoing  
51  
52 nutritional transition. Mexico has been facing rapid epidemiological and  
53  
54 demographic changes with nutritional and environmental components. The health  
55  
56  
57  
58  
59  
60

1  
2  
3 profile of the Mexican population indicates a shift from high rates of mortality and  
4 infectious diseases - typical of poor countries - to low rates of mortality and high  
5 rates of non-communicable diseases - the main cause of mortality in wealthy  
6 countries [50].  
7  
8  
9  
10  
11

12  
13 Our study was subject to several limitations. First, its cross-sectional design  
14 restricts the drawing of causal inferences. Additionally, its findings refer specifically  
15 to Mexican children, adolescents and similar population groups, and therefore  
16 cannot be generalized to others.  
17  
18  
19  
20  
21  
22

23  
24 Nevertheless, our study also has a number of strengths. For instance, our findings  
25 contribute to the limited research available on the relationship between HFI and the  
26 nutritional status of mother-child pairs. In addition, this is one of the first studies in  
27 this field dealing specifically with the Mexican population. The large sample size of  
28 our study constitutes another strength. It allowed us to introduce possible  
29 confounders in the statistical models and to provide evidence useful at the national  
30 level.  
31  
32  
33  
34  
35  
36  
37  
38  
39  
40

41 In order to develop effective and integral nutritional strategies, policymakers need  
42 to recognize the apparently contradictory presence of adult overweight/obesity and  
43 childhood stunting in the same household and understand its association with HFI.  
44 For households at different HFI levels to experience an actual improvement in their  
45 nutritional status, efforts to abate overnutrition, undernutrition and inadequate  
46 dietary quality must be rooted in this knowledge.  
47  
48  
49  
50  
51  
52  
53  
54  
55  
56  
57  
58  
59  
60



1  
2  
3 Interestingly, our study found that, in preschool children, HFI severity increased the  
4 risk of stunting only if their mothers were not obese. This may be explained by the  
5 growth of urbanization resulting in higher household incomes and greater food  
6 availability, but only as regards quantity, not quality [51]. The foods available to  
7 poor urban households are likely to be energy-rich but nutrient-poor. The presence  
8 of non-obese mothers in FI households may indicate a dearth of adequate quality  
9 food for children redounding in micronutrient deficiencies and protein quality issues  
10 that hinder their growth - particularly in relation to height. By contrast, the presence  
11 of maternal obesity in FI households may indicate greater access to the calories  
12 and nutrients needed for adequate child development, and may also account for  
13 the lower prevalence of stunting in these homes. This may explain the relative lack  
14 of any relationship of stunting to HFI severity in households with obese mothers.  
15  
16  
17  
18  
19  
20  
21  
22  
23  
24  
25  
26  
27  
28  
29  
30  
31

## 32 **Conclusions**

33  
34  
35 The double burden of malnutrition in Mexico occurs most notably among mother-  
36 child pairs living with HFI. Crafting a sound approach to combat malnutrition is  
37 complex because of its multi-dimensional nature [52]. These conditions hamper the  
38 implementation of effective measures capable of protecting vulnerable population  
39 groups and ensuring adequate livelihoods. Policies and programs must tackle  
40 chronic undernutrition and overnutrition according to the food and nutritional needs  
41 of each age group, rather than assuming that their needs will be met by targeting  
42 the household as a homogenous unit. Consistent with other studies, our work  
43 highlights the importance of monitoring household food security based on  
44  
45  
46  
47  
48  
49  
50  
51  
52  
53  
54  
55  
56  
57  
58  
59  
60

1  
2  
3  
4  
5  
6  
7  
8  
9  
10  
11  
12  
13  
14  
15  
16  
17  
18  
19  
20  
21  
22  
23  
24  
25  
26  
27  
28  
29  
30  
31  
32  
33  
34  
35  
36  
37  
38  
39  
40  
41  
42  
43  
44  
45  
46  
47  
48  
49  
50  
51  
52  
53  
54  
55  
56  
57  
58  
59  
60

experience-related scales such as ELCSA. These have proved highly useful for food security governance [53].

For peer review only

## List of abbreviations

BMI - Body Mass Index

ELCSA - Latin American and Caribbean Food Security Scale

ENSANUT 2012 - Mexican National Health and Nutrition Survey in Latin American

HFI - Household Food Insecurity

WHO - World Health Organization

## Declarations

### Ethics approval and consent to participate

All study procedures involving human participants were approved by the Ethics Committee of the National Institute of Public Health in Mexico. Written informed consent was obtained from all survey participants, with parents serving as proxies of minors under seven years.

### Availability of data and materials

<https://drive.google.com/a/cimat.mx/folderview?id=0BzGYRm5Poz8OdWhGWUhadENBSDA&usp=sharing>

### Competing interests

The authors declared no conflict of interest.

### Funding

The National Health and Nutrition Survey (*ENSANUT 2012*) was funded by the Mexican Ministry of Health.

### Authors' contributions

The responsibilities of the authors were distributed as follows: TSL and IMGH contributed to data analysis and interpretation. They drafted the manuscript based on the input and feedback of all the co-authors. VMR, LCN and MCMR contributed

1  
2  
3 to the study design and critical review of the manuscript. TSL and RPE contributed  
4  
5 to the study design, interpretation of results and critical review of the manuscript.  
6  
7  
8 All the authors read and approved the final version of the manuscript.  
9

## 10 11 **Acknowledgments**

12  
13  
14 The authors wish to thank Erick Mauricio Rolando López for his support in  
15  
16 developing the tables. They also gratefully acknowledge the staff of the National  
17  
18 Health and Nutrition Survey 2012 who made this work possible.  
19  
20  
21  
22  
23  
24  
25  
26  
27

## 28 **References**

- 29  
30 1. Food and Agriculture Organization FAO. Food security statistics home.  
31 <http://www.fao.org/economic/ess/ess-fs/en/> 2016. Accessed April 14, 2016.
- 32  
33 2. Food and Agriculture Organization, International Fund for Agricultural  
34 Development, World Food Programme. The state of food insecurity in the  
35 world 2014. Strengthening the enabling environment for food security and  
36 nutrition. Rome, Italy, 2014.
- 37  
38 3. UN Millennium Project 2005. Halving hunger: it can be done. Task Force on  
39 Hunger, 2005. [http://www.unmillenniumproject.org/documents/Hunger-](http://www.unmillenniumproject.org/documents/Hunger-lowres-complete.pdf)  
40 [lowres-complete.pdf](http://www.unmillenniumproject.org/documents/Hunger-lowres-complete.pdf). Accessed April 14, 2016.
- 41  
42 4. Jones AD, Ngure FM, Pelto G, Young SL. What are we assessing when we  
43 measure food security? A compendium and review of current metrics. *Adv*  
44 *Nutr.* 2013;4:481-505.
- 45  
46 5. Pérez-Escamilla R, Melgar-Quiñonez H, Nord M, Álvarez MC, Segall-  
47 Correa AM. Escala latinoamericana y caribeña de seguridad alimentaria  
48 (ELCSA). In Memorias de la 1ª Conferencia en América Latina y el Caribe  
49 sobre la medición de la seguridad alimentaria en el hogar. *Perspectivas en*  
50 *Nutrición Humana.* 2007; Suppl 1:117-34.
- 51  
52 6. Barrett, C. B. (2010). Measuring food insecurity. *Science*, 327(5967), 825-  
53 828.  
54  
55  
56  
57  
58  
59  
60

- 1  
2  
3 7. Shamah-Levy T, Mundo-Rosas V, Rivera-Dommarco JA. Magnitude of food  
4 insecurity in Mexico: its relationship with nutritional status and  
5 socioeconomic factors. *Salud Publica Mex* 2014;56 suppl 1:S79-S85.
- 6  
7 8. Martin KS, Ferris AM. Food insecurity and gender are risk factors for  
8 obesity. *J Nut Educ Behav*. 2007;39:31-36.
- 9  
10 9. Townsend MS, Peerson J, Love B, Achterberg C, Murphy SP. Food  
11 insecurity is positively related to overweight in women. *J Nutr*.  
12 2001;131:1738-1745.
- 13  
14 10. Adams EJ, Grummer-Strawn L, Chavez G. Food insecurity is associated  
15 with increased risk of obesity in California women. *J Nutr*. 2003;133:1070-  
16 1074.
- 17  
18 11. Morales-Ruán MC, Méndez-Gómez Humarán I, Shamah-Levy T,  
19 Valderrama-Álvarez Z, Melgar-Quiñónez H. Food insecurity is associated  
20 with obesity in adult women of Mexico. *Salud Publica Mex*. 2014; 56 Suppl  
21 1:54-61.
- 22  
23 12. Hanson KL, Sobal J, Frongillo EA. Gender and Marital Status Clarify  
24 Associations between food insecurity and body weight. *J Nutr*. 2007;  
25 137:1460–1465.
- 26  
27 13. Nord M, Andrews M, Carlson S. Household food security in the US, 2008.  
28 US Department of Agriculture. Economic Research Service. Washington  
29 DC: 2009.
- 30  
31 14. Healthy Eating Research A National Program of the Robert Wood Johnson  
32 Foundation. Food Insecurity and Risk for Obesity Among Children and  
33 Families: Is There a Relationship?. Healthy Eating Research Building  
34 evidence to prevent childhood obesity. A Research Synthesis, April 2010.
- 35  
36 15. Pérez-Escamilla R, Obbagy JE, Altman JM, Essery EV, McGrane MM,  
37 Wong YP, Spahn JM, Williams CL. Dietary energy density and body weight  
38 in adults and children: a systematic review. *J Acad Nutr Diet*. 2012;  
39 112:671-84.
- 40  
41 16. Drewnowski A, Specter SE. Poverty and obesity: the role of energy density  
42 and energy costs. *Am J Clin. Nutr*. 2004;79:6-16.
- 43  
44 17. Dietz, W. Does hunger cause obesity? *Pediatrics*. 1995;96:766-767.
- 45  
46 18. Barquera S, Campos-Nonato I, Hernández-Barrera L, Pedroza-Tobías A,  
47 Rivera-Dommarco JA. Prevalence of obesity in Mexican adults 2000-2012.  
48 *Salud Publica Mex*. 2013;55 Suppl 2:151-160.
- 49  
50 19. Cuevas-Nasu L, Rivera-Dommarco JA, Shamah-Levy T, Mundo-Rosas V,  
51 Méndez-Gómez Humarán I. Food insecurity and nutritional status of pre-  
52 school children in Mexico. *Salud Publica Mex*. 2014;56 Suppl 1:47-53.
- 53  
54 20. Black RE, Victora CG, Walker SP, Bhutta ZA, Christian P, de Onis M, et al.  
55 Maternal and child undernutrition and overweight in low-income and middle-  
56 income countries. *Lancet*. 2013;382:427–51.
- 57  
58  
59  
60

- 1  
2  
3 21. Romero-Martínez M, Shamah-Levy T, Franco-Núñez A, Villalpando S,  
4 Cuevas-Nasu L, Gutiérrez JP, Rivera J. National Health and Nutrition Survey  
5 2012: design and coverage. *Salud Publica Mex.* 2013;55 Suppl 2:332-340.  
6
- 7 22. Perez-Escamilla R, Melgar-Quiñonez H, Nord M, Álvarez MC, Segall-Correa  
8 AM. Escala Latinoamericana y Caribeña de Seguridad Alimentaria  
9 (ELCSA). Memorias de la 1a. Conferencia en América Latina y el Caribe  
10 sobre la medición de la seguridad alimentaria en el hogar. *Perspectivas en*  
11 *Nutrición Humana.* 2007;(S):117-34.  
12
- 13 23. Pérez-Escamilla R, Segall-Corrêa AM, Kurdian Maranhã L, Sampaio M de  
14 F, Marín-León L, Panigassi G. 2004. An adapted version of the U.S.  
15 Department of Agriculture Food Insecurity module is a valid tool for  
16 assessing household food insecurity in Campinas, Brazil.  
17 *J.Nutr.*134(8):1923-8.  
18
- 19 24. Pérez-Escamilla R, Parás P, Acosta MJ, Peyrou S, Nord M, Hromi-Fiedler  
20 A. 2011. Are the Latin American and Caribbean Food Security Scale  
21 (ELCSA) items comparable across countries? *FASEB J.* 25:226.8.  
22
- 23 25. Álvarez MC, Melgar-Quiñonez H, Estrada A, Vélez OL. 2008. Validación  
24 interna y externa de la escala Latinoamericana y Caribeña para la medición  
25 de la Seguridad Alimentaria en el Hogar. Editorial Divergráficas. Medellín.  
26
- 27 26. Lohman T, Roche AF, and Martorell R. Anthropometric standardization  
28 reference manual: Abridged edition. Champaign, IL: Human Kinetics Books.  
29 1988.  
30
- 31 27. Habicht JP. Standardization of quantitative epidemiological methods in the  
32 field. *Pan Am Sanit Bur.* 1974;76:375-384.  
33
- 34 28. World Health Organization. WHO child growth standards: length/height-for-  
35 age, weight-for-age, weight-for-length, weight-for-height and body mass  
36 index-for-age: methods and development. 2006.  
37 [http://www.who.int/childgrowth/standards/Technical\\_report.pdf](http://www.who.int/childgrowth/standards/Technical_report.pdf). Accessed  
38 April 19, 2016.  
39
- 40 29. Onis MD, Onyango AW, Borghi E, Siyam A, Nishida C, Siekmann J.  
41 Development of a WHO growth reference for school-aged children and  
42 adolescents. *Bull World Health Organ.* 2007;85:660-667.  
43
- 44 30. World Health Organization. Obesity: preventing and managing the global  
45 epidemic. Report of a WHO consultation. 2000.  
46 [http://www.who.int/nutrition/publications/obesity/WHO\\_TRS\\_894/en/](http://www.who.int/nutrition/publications/obesity/WHO_TRS_894/en/).  
47 Accessed April 19, 2016.  
48
- 49 31. Gutiérrez JP, Rivera-Dommarco J, Shamah-Levy T, Villalpando-Hernández  
50 S, Franco A, Cuevas-Nasu L, Romero-Martínez M, Hernández-Ávila M.  
51 Encuesta Nacional de Salud y Nutrición 2012. Resultados Nacionales.  
52 Cuernavaca, México: Instituto Nacional de Salud Pública (MX), 2012.pp  
53 137-138.  
54  
55  
56  
57  
58  
59  
60

- 1  
2  
3  
4  
5  
6  
7  
8  
9  
10  
11  
12  
13  
14  
15  
16  
17  
18  
19  
20  
21  
22  
23  
24  
25  
26  
27  
28  
29  
30  
31  
32  
33  
34  
35  
36  
37  
38  
39  
40  
41  
42  
43  
44  
45  
46  
47  
48  
49  
50  
51  
52  
53  
54  
55  
56  
57  
58  
59  
60
32. Popkin BM. Global nutrition dynamics: the world is shifting rapidly toward a diet linked with noncommunicable diseases. *Am J Clin Nutr.* 2006;84:289-98.
  33. Gubert MB, Spaniol AM, Segall-Corrêa AM, Pérez-Escamilla R. Understanding the Double Burden of Malnutrition in Food Insecure Households in Brazil. *Maternal Child Nutr.* 2016 [Epub ahead of print].
  34. Kroker-Lobos MF, Pedroza-Tobias A, Pedraza LS, Rivera JA. The double burden of undernutrition and excess body weight in Mexico. *Am J Clin Nutr.* 2014;100:1652–8. doi: 10.3945/ajcn.114.083832.
  35. Kaiser LL, Melgar-Quiñonez H, Townsend MS, Nicholson Y, Fujii ML, Martin AC, Lamp CL. Food Insecurity and food supplies in Latino households with Young Children. *J Nutr Educ Behav.* 2003;35(3):148-53.
  36. Segall Correa AM, Panigass G, Archanjo Sampaio MF, Marin-Leon L, Perez-Escamilla R. Validación de instrumento de medida de la inseguridad alimentaria y hambre en el contexto de las políticas brasileñas de combate al hambre. Memorias de la 1ª Conferencia en América Latina y el Caribe sobre la medición de la seguridad alimentaria en el hogar. *Perspectivas en Nutrición Humana.* 2007;(S):89-102
  37. Hackett M, Melgar-Quiñonez H, Zubieta AC, Hernandez K. Food Security and Household Food Supplies in Rural Ecuador. *Arch Latinoam Nutr.* 2007;57(1):10-17.
  38. Huet C, Rosol R, Egeland G. The Prevalence of Food Insecurity Is High and the Diet Quality Poor in Inuit Communities. *J. Nutr.* 2012. doi: 10.3945/jn.111.149278.
  39. Mundo-Rosas V, De la Cruz-Góngora V, Jiménez-Aguilar A, Shamah-Levy T. Diversidad de la dieta y consumo de nutrimentos en niños de 24 a 59 meses de edad y su asociación con inseguridad alimentaria. *Salud Publica Mex* 2014;56: s39-s46.
  40. Melgar-Quinonez H, Zubieta AC, Valdez E, Whitelaw B, Kaiser L. Validation of an instrument to monitor food insecurity in Sierra de Manantlán, Jalisco. *Salud Pública Mex.* 2005;47(6):413-22.
  41. Rivera JA, Pedraza LS, Martorell R, Gil A. Introduction to the double burden of undernutrition and excess weight in Latin America. *Am J Clin Nutr.* 2014;100 Suppl:1613-1616.
  42. McCrory MA, Fuss PJ, McCallum JE, Yao M, Vinken AG, Hays NP, et al. Dietary variety within food groups: association with energy intake and body fatness in men and women. *Am J Clin Nutr* 1999;69:440–7.
  43. Matheson DM, Varady J, Varady A, Killen JD. Household food security and nutritional status of Hispanic children in the fifth grade. *Am J Clin Nutr.* 2002;76:210-217.

- 1  
2  
3  
4  
5  
6  
7  
8  
9  
10  
11  
12  
13  
14  
15  
16  
17  
18  
19  
20  
21  
22  
23  
24  
25  
26  
27  
28  
29  
30  
31  
32  
33  
34  
35  
36  
37  
38  
39  
40  
41  
42  
43  
44  
45  
46  
47  
48  
49  
50  
51  
52  
53  
54  
55  
56  
57  
58  
59  
60
44. Townsend M, Peerson J, Love B, Achterberg C, Murphy S. Food Insecurity Is Positively Related to Overweight in Women. *J. Nutr.*, 2001. 131: 1738–1745.
45. Caulfield E, Richard S, Rivera JA, Musgrove P, Black R. Stunting, Wasting, and Micronutrient Deficiency Disorders. In: Disease Control Priorities in Developing Countries. Jamison DT, Breman JG, Measham AR, et al., editors. Washington (DC): The International Bank for Reconstruction and Development / The World Bank; New York: Oxford University Press; 2006.
46. Frongillo EA. Confronting myths about household food insecurity and excess weight. *Cad Saúde Pública*. 2013;29:229-230.
47. Fanzo J, Pronyk P, Dasgupta A, Towle M, Menon V, Denning G, Zycherman RF, Roth GI. An evaluation of progress toward the Millennium Development Goal One Hunger Target: A country-level, food and nutrition security perspective. Center for Global Health and Economic Development. The Earth Institute of Columbia University. [http://millenniumvillages.org/wp-content/uploads/2010/01/Evaluation-of-Progress\\_Fanzo.pdf](http://millenniumvillages.org/wp-content/uploads/2010/01/Evaluation-of-Progress_Fanzo.pdf). 2010. Accessed jun 21, 2016.
48. Dinour LM, Bergen D, Yeh M. The food insecurity–obesity paradox: a review of the literature and the role food stamps may play. *J Am Diet Assoc*. 2007;107:1952-1961.
49. Leroy JL, Gadsden P, Rodríguez-Ramírez S, González de Cossío T. Cash and in-kind transfers in poor rural communities in Mexico increase household fruit, vegetable, and micronutrient consumption but also lead to excess energy consumption. *J Nutr*. 2010;140:612–7.
50. Stevens G, Dias RH, Thomas KJ, Rivera JA, Carvalho N, Barquera S, Hill K, Ezzati M. Characterizing the Epidemiological Transition in Mexico: National and Subnational Burden of Diseases, Injuries, and Risk Factors. *PLoS Med*. 2008;5, e125. doi:10.1371/journal.pmed.0050163.
51. Kolopaking R, Bardosono S, Fahmida U. Maternal self-efficacy in the home food environment: a qualitative study among low-income mothers of nutritionally at-risk children in an urban area of Jakarta, Indonesia. *J Nut Educ Behav*. 2011;43:180-188. [doi:10.1016/j.jneb.2009.10.010](https://doi.org/10.1016/j.jneb.2009.10.010).
52. Mahmudiono T, Nindya TS, Andrias DR, Megatsari H, Rosenkranz RR. The effectiveness of nutrition education for overweight/obese mothers with stunted children (NEO-MOM) in reducing the double burden of malnutrition in Indonesia: study protocol for a randomized controlled trial. *BMC Public Health*. 2016;16:1
53. Pérez-Escamilla R. Can experience-based household food security scales help improve food security governance? *Glob Food Sec*. 2012;1:120-125.



1  
2  
3  
4  
5 **Figure 1. Effect of HFI-maternal obesity interaction on stunting among children <5**  
6 **years**  
7  
8  
9  
10  
11  
12  
13  
14  
15  
16  
17  
18  
19  
20  
21  
22  
23  
24  
25  
26  
27  
28  
29  
30  
31  
32  
33  
34  
35  
36  
37  
38  
39  
40  
41  
42  
43  
44  
45  
46  
47  
48  
49  
50  
51  
52  
53  
54  
55  
56  
57  
58  
59  
60

For peer review only

1  
2  
3  
4  
5  
6  
7  
8  
9  
10  
11  
12  
13  
14  
15  
16  
17  
18  
19  
20  
21  
22  
23  
24  
25  
26  
27  
28  
29  
30  
31  
32  
33  
34  
35  
36  
37  
38  
39  
40  
41  
42  
43  
44  
45  
46  
47  
48  
49  
50  
51  
52  
53  
54  
55  
56  
57  
58  
59  
60

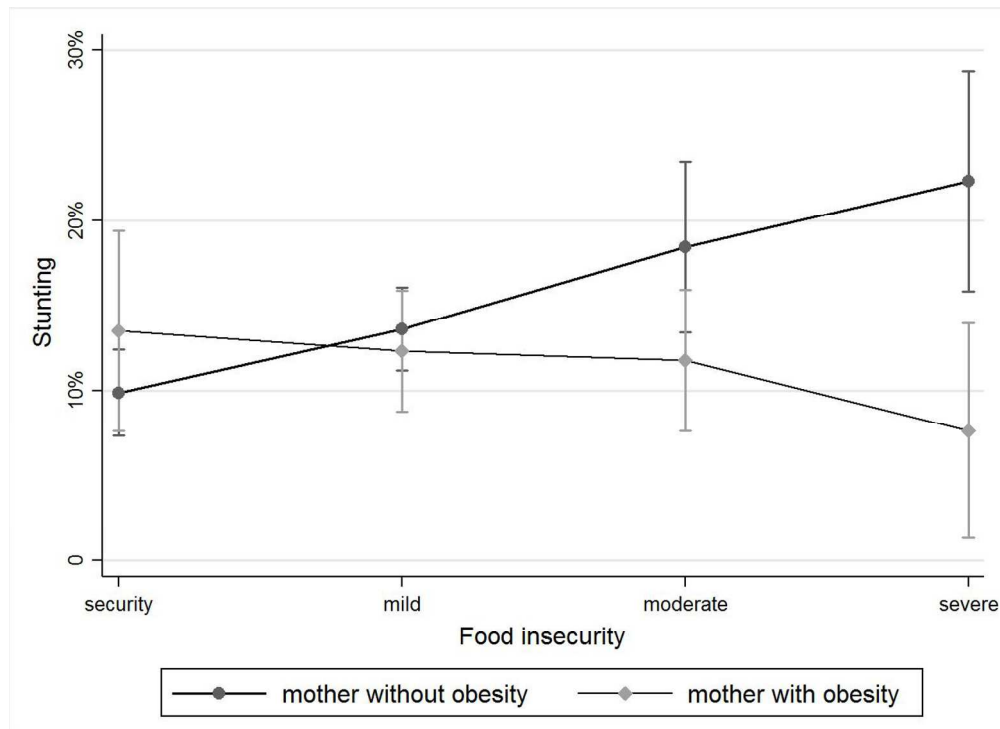

Figure 1. Effect of HFI-maternal obesity interaction on stunting among children <5 years

340x247mm (300 x 300 DPI)

1  
2  
3  
4  
5  
6  
7  
8 **Checklist of items that included in the manuscript: Food insecurity and the nutritional status of**  
9 **Mexican mother-child pairs**  
10

|                           | PAGE  |
|---------------------------|-------|
| Title and abstract        | 1-2   |
| Introduction              | 4-6   |
| Objectives                | 6     |
| Study design              | 6-7   |
| Setting                   | 7     |
| Participants              | 7     |
| Variables                 | 7     |
| Data sources/ measurement | 7     |
| Study size                | 7     |
| Quantitative variables    | 8     |
| Statistical methods       | 10    |
| Results                   | 11    |
| Participants              | 11    |
| Descriptive data          | 11-13 |
| Outcome data              | 14    |
| Main results              | 15-16 |
| Other analyses            | 17-19 |
| Discussion                | 20    |
| Key results               | 20-24 |
| Limitations               | 22-23 |

1  
2  
3  
4  
5  
6  
7  
8  
9  
10  
11  
12  
13  
14  
15  
16  
17  
18  
19  
20  
21  
22  
23  
24  
25  
26  
27  
28  
29  
30  
31  
32  
33  
34  
35  
36  
37  
38  
39  
40  
41  
42  
43  
44  
45  
46  
47  
48  
49  
50  
51  
52  
53  
54  
55  
56  
57  
58  
59  
60

|                           |       |
|---------------------------|-------|
| Interpretation            | 20-24 |
| Generalizability          | 24    |
| <b>Other information:</b> |       |
| Funding                   | 25    |

For peer review only

# BMJ Open

## Food insecurity and maternal-child nutritional status in Mexico: cross-sectional analysis of the National Health and Nutrition Survey 2012

|                                 |                                                                                                                                                                                                                                                                                                                                                                                                                                                                                |
|---------------------------------|--------------------------------------------------------------------------------------------------------------------------------------------------------------------------------------------------------------------------------------------------------------------------------------------------------------------------------------------------------------------------------------------------------------------------------------------------------------------------------|
| Journal:                        | <i>BMJ Open</i>                                                                                                                                                                                                                                                                                                                                                                                                                                                                |
| Manuscript ID                   | bmjopen-2016-014371.R2                                                                                                                                                                                                                                                                                                                                                                                                                                                         |
| Article Type:                   | Research                                                                                                                                                                                                                                                                                                                                                                                                                                                                       |
| Date Submitted by the Author:   | 17-May-2017                                                                                                                                                                                                                                                                                                                                                                                                                                                                    |
| Complete List of Authors:       | Shamah- Levy, Teresa; Instituto Nacional de Salud Publica, Nutrition Monitoring<br>Mundo-Rosas, Verónica ; Instituto Nacional de Salud Publica, Nutrition Monitoring<br>Morales-Ruan, Carmen; Instituto Nacional de Salud Publica, Nutrition Monitoring<br>Cuevas-Nasu, Lucia; Instituto Nacional de Salud Publica, Nutrition Monitoring<br>Méndez-Gómez-Humarán, Ignacio; Center for Research in Mathematics (CIMAT)<br>Pérez-Escamilla, Rafael; Yale School of Public Health |
| <b>Primary Subject Heading</b>: | Public health                                                                                                                                                                                                                                                                                                                                                                                                                                                                  |
| Secondary Subject Heading:      | Epidemiology, Health policy                                                                                                                                                                                                                                                                                                                                                                                                                                                    |
| Keywords:                       | NUTRITION & DIETETICS, PUBLIC HEALTH, EPIDEMIOLOGY                                                                                                                                                                                                                                                                                                                                                                                                                             |
|                                 |                                                                                                                                                                                                                                                                                                                                                                                                                                                                                |

SCHOLARONE™  
Manuscripts

1  
2  
3 **Food insecurity and maternal-child nutritional status in Mexico: cross-**  
4 **sectional analysis of the National Health and Nutrition Survey 2012**  
5

6  
7 Teresa Shamah-Levy<sup>1\*</sup> ([tshamah@insp.mx](mailto:tshamah@insp.mx)), Verónica Mundo-Rosas<sup>1</sup>  
8 ([vmundo@insp.mx](mailto:vmundo@insp.mx)), Carmen Morales-Ruan<sup>1</sup> ([cmruan@insp.mx](mailto:cmruan@insp.mx)), Lucia Cuevas-  
9 Nasu<sup>1</sup> ([lcuevas@insp.mx](mailto:lcuevas@insp.mx)), Ignacio Méndez Gómez –Humarán<sup>2</sup>  
10 ([imendez@cimat.mx](mailto:imendez@cimat.mx)), Rafael Pérez-Escamilla<sup>3</sup> ([rafael.perez-escamilla@yale.edu](mailto:rafael.perez-escamilla@yale.edu))  
11

- 12  
13
- 14 • Center for Nutrition and Health Research, National Institute of Public Health
  - 15 (INSP), Cuernavaca, Morelos, Mexico
  - 16 • Center for Research in Mathematics (CIMAT), Aguascalientes,
  - 17 Aguascalientes, Mexico
  - 18 • Yale School of Public Health, New Haven, Connecticut, USA
- 19

20  
21 \*Correspondence should be addressed to Dr. Teresa Shamah-Levy, Research  
22 Center for Nutrition and Health Research, National Institute of Public Health  
23 (INSP), Av. Universidad No. 655, Col. Sta. Ma. Ahuacatlán, C.P. 62100,  
24 Cuernavaca, Morelos, México  
25 Telephone/Fax number: +52 (777) 3113787, e-mail: [tshamah@insp.mx](mailto:tshamah@insp.mx)  
26  
27

28  
29  
30 WORD COUNT: 2902

31  
32 NUMBER OF FIGURES: 1

33  
34 NUMBER OF TABLES: 4  
35  
36  
37  
38  
39  
40  
41  
42  
43  
44  
45  
46  
47  
48  
49  
50  
51  
52  
53  
54  
55  
56  
57  
58  
59  
60

## Abstract

**Objective** To examine the association between Household Food Insecurity (HFI) and risk of childhood stunting, and to determine whether this association is modified by maternal-child overweight/obesity.

**Design** Observational cross-sectional study.

**Setting** Data comes from the Mexican National Health and Nutrition Survey (*ENSANUT 2012* by its initials in Spanish), representative of rural and urban areas.

**Participants** Our study sample included 5,087 mother-preschool child pairs and 7,181 mother-schoolchild pairs. HFI was measured according to the Latin American and Caribbean Food Security Scale (*ELCSA* by its initials in Spanish). Weight and recumbent length or height measures were obtained from children. Overweight and obesity in women were determined according to the WHO Growth Reference charts. The following covariates were included: sex of the child, urbanicity (urban/rural), region of residence, and maternal education, benefiting from a food assistance programs and socioeconomic status (SES) index was included.

**Main outcome measures** Differences in the prevalence (95% CI) of each HFI category by socioeconomic characteristic and maternal-child nutritional status was estimated. A logistic regression model was conducted for stunting and overweight among preschool children and for stunting and overweight/obesity among schoolchildren, adjusting for pertinent covariates. Results were expressed as Adjusted Odds Ratios (AORs).

**Results** Stunting proved more prevalent in preschool children with moderate or severe HFI (16.2% and 16.8%, respectively) ( $p=0.036$  and  $p=0.007$ , respectively) than in their counterparts with mild or no HFI (13.2% and 10.7%, respectively). Furthermore, the interaction between HFI and maternal obesity had a significant impact on stunting in preschool children ( $p<0.05$ ). Severe HFI increased risk of stunting in children with non-obese mothers but not in those with obese mothers.

**Conclusion** We have discovered a new relationship between HFI and maternal obesity on the one hand and risk of childhood stunting on the other. This may reflect a shared mechanism involving dual forms of malnutrition.

### Strengths and limitations of this study

- The cross-sectional study design restricts the drawing of causal inferences, and our results cannot be generalized, as they refer specifically to children, adolescents and similar population groups in Mexico.
- The findings of the study provide a significant contribution to the limited research available on the relationship between HFI and the nutritional status of mother-child pairs.
- This study is a pioneering study in the field, dealing specifically with the Mexican population.
- The large sample size of the study allowed us to introduce possible confounding variables in our statistical models and draw conclusions at the national level.



## Introduction

## Background

Food security “exists when all people, at all times, have physical, social and economic access to sufficient, safe and nutritious food which meets their dietary needs and food preferences for an active and healthy life, and is supported by an environment of adequate sanitation, health services and care” [1, 2].

The term hunger refers both to a feeling of discomfort from not eating and to the state of undernutrition, particularly within the context of food insecurity (FI) [3]. Experience-based indices can serve to assess hunger directly at the household level [4].

Household Food Insecurity (HFI) has been defined as “limited or uncertain availability of nutritionally adequate and safe food and also as limited and uncertain ability to acquire adequate food in socially acceptable ways” [5].

FI is a growing concern worldwide. It is estimated that over one billion people suffer from insufficient availability of dietary energy, and at least twice that number suffer from micronutrient deficiency [6].

FI in Mexico has evolved within a complex and contrasting environment where undernutrition and overweight/obesity, together, form part of an advanced nutritional transition characterized by widespread HFI. One out of three Mexican households suffers from moderate or severe FI. This condition heightens not only

1  
2  
3 the risk of malnutrition in children, but also the incidence of diabetes, overweight  
4 and obesity in adults, principally among women [7].  
5  
6  
7

8  
9 Recent studies have suggested a link between HFI and obesity [8], especially in  
10 adult women [9-11]. For instance, it has been documented that women with FI are  
11 more likely to suffer from obesity than women without FI [12]. It has also been  
12 reported that racial/ethnic minority communities and low-income households are  
13 the population groups most severely affected by HFI [13].  
14  
15  
16  
17  
18  
19

20  
21 Generally viewed as separate public health problems, there is growing concern  
22 that FI and obesity may be related. FI can lead to weight gain because high-fat,  
23 high-calorie and energy-dense foods offer the least expensive option for obtaining  
24 calories [14], and these products, available at lower prices than healthful foods  
25 [15], have been identified as risk factors for child and adult obesity [16].  
26 Furthermore, HFI can trigger disorderly eating patterns characterized by bingeing  
27 and restricted eating, depending on the availability of supplies, thus negatively  
28 affecting the body's metabolism [17].  
29  
30  
31  
32  
33  
34  
35  
36  
37  
38  
39

40  
41 Recent decades have witnessed alarming increases in prevalence of  
42 overweight/obesity among Mexican children: from 7.8% in 1988 to 9.7% in 2012 for  
43 children under five; from 26.9% in 1999 to 34.4% in 2012 for 5-11-year olds; and  
44 from 11.1% in 1988 to 35.8% in 2012 for female adolescents aged 12-19 years. In  
45 the adult population aged 20 and older, prevalence jumped from 61.8% to 71.3% in  
46 twelve years [18].  
47  
48  
49  
50  
51  
52  
53  
54  
55  
56  
57  
58  
59  
60

1  
2  
3 In 2012, children under five living in severe-FI households indicated 42% higher  
4 risk of stunting or chronic malnutrition than did their counterparts living in food  
5 secure households [19]. That same year women aged 20 to 59 had an average  
6 BMI of 28.9. More specifically, those living in mild, moderate and severe HFI had  
7 BMIs of 28.3, 29.3 and 29.4, respectively ( $p<0.001$ ,  $p=0.011$  and  $p=0.007$ ,  
8 respectively) [11].  
9

10  
11  
12  
13  
14  
15  
16  
17  
18 The double burden of malnutrition can occur not only within the same country, city  
19 or household (mother-child pairs), but also within the same individual at different  
20 stages of his or her life [20]. The fact that HFI may be associated with both  
21 undernutrition and obesity has been documented [17].  
22  
23  
24  
25  
26  
27

28  
29 The twofold purpose of this article is to examine the association between HFI and  
30 risk of childhood stunting, and to determine whether this association is modified by  
31 maternal-child overweight/obesity.  
32  
33  
34  
35

## 36 **Methods**

### 37 *Study population*

38  
39  
40  
41  
42  
43 Data were drawn from *ENSANUT 2012*, a cross-sectional, probabilistic and cluster  
44 survey with national, regional, urban-rural and state-level representativity.  
45  
46  
47  
48  
49  
50  
51  
52  
53  
54  
55  
56  
57  
58  
59  
60  
Oversampling was directed to Mexican households of lower socioeconomic status.  
A sample of 50,528 households of an estimated 29,429,252 households  
nationwide was obtained between October 2011 and May 2012. Details of sample  
size and design have been described elsewhere [21].

1  
2  
3 Our study consisted of a secondary analysis based on *ENSANUT 2012*. A total of  
4  
5 5,087 preschool children (1-4y), 8,401 schoolchildren (5-11y) and 9,581 mothers  
6  
7 were included in the survey. We used a matching process to identify mother-  
8  
9 preschool child and mother-schoolchild pairs, and included a total of 5,087 mother-  
10  
11 preschool child pairs in our analysis. None of the mothers in this group had more  
12  
13 than one child. A total of 7,181 mother-schoolchild pairs were included, with 2,432  
14  
15 mothers having more than one schoolchild, in which cases only one schoolchild  
16  
17 was used in the matching process. Finally, the 2,677 mothers in the sample who  
18  
19 had preschool children and schoolchildren were included in both pair groups.  
20  
21  
22  
23

24  
25 Our analytical sample included 5,087 mother-preschool child pairs and 7,181  
26  
27 mother-schoolchild pairs with complete data. Where mothers had more than one  
28  
29 schoolchild meeting the study criteria, analysis considered all their children.  
30  
31  
32

33 Informed consent was obtained from all respondents – or their parents/guardians in  
34  
35 cases of children under seven years – prior to their participation in the study. The  
36  
37 survey protocol was approved by the Ethics Committee of the National Institute of  
38  
39 Public Health in Mexico.  
40  
41  
42

#### 43 *HFI measurement*

44  
45  
46 HFI was measured using a version of the Latin American and Caribbean Food  
47  
48 Security Scale (*ELCSA* by its initials in Spanish). The scale included 15 questions  
49  
50 targeting the head of the family or the woman in charge of preparing meals. Eight  
51  
52 questions referred directly to HFI either in the household or specifically in the  
53  
54 adults within the household; the remaining seven referred to HFI in minors (<18y).  
55  
56  
57  
58  
59  
60

1  
2  
3 The reference time frame was three months prior to survey administration. Based  
4 on the number of positive responses, and depending on whether or not households  
5 included people under 18, they were grouped into the following categories:  
6 households with no HFI (0 positive responses), mild HFI (1 to 3), moderate HFI (4  
7 to 6), and severe HFI (7 to 8); and households with adults and minors under 18: no  
8 HFI (0 positive responses), mild HFI (1 to 5), moderate HFI (6 to 10), and severe  
9 HFI (11 to 15)[22]. The ELCSA has been validated in populations in the United  
10 States as well as in Mexico and other Latin American countries [23-25].  
11  
12  
13  
14  
15  
16  
17  
18  
19  
20  
21  
22

### 23 *Anthropometric measurements*

24  
25  
26 Weight and recumbent length measures were obtained from children < 2 and  
27 standing height measures from children aged 2 to < 5 following standard  
28 recommended procedures [26,27].  
29  
30  
31  
32  
33

34 The anthropometric measures together with the age and sex of the children were  
35 used to calculate the weight-for-age, height-for-age, and weight-for-height z-scores  
36 according to the WHO growth standards [28]. Prevalence of undernutrition in its  
37 different forms (underweight, wasting and stunting) was calculated using the < -2 z-  
38 score cut-off point using the WHO growth standards.  
39  
40  
41  
42  
43  
44  
45

46 Overweight and obesity were determined according to the WHO Growth Reference  
47 charts [29], with BMI ( $\text{kg}/\text{m}^2$ ) z-scores adjusted for age: values between -5.0 and  
48 +5.0 were considered outside this range and regarded as implausible. There were  
49 no implausible values for BMI z-scores in children. For adults, the WHO standard  
50 BMI cut-off points were used to classify mothers into the following categories:  
51  
52  
53  
54  
55  
56  
57  
58  
59  
60

1  
2  
3 underweight ( $<18.5 \text{ kg/m}^2$ ), normal weight ( $18.5$  to  $24.9 \text{ kg/m}^2$ ), overweight ( $25$ -  
4  $29.9 \text{ kg/m}^2$ ) and obese ( $\geq 30 \text{ kg/m}^2$ ) [30]. Only BMI values between 10 and 58 were  
5  
6 considered; no BMI values were regarded as implausible.  
7  
8

### 9 10 11 *Covariates*

12  
13  
14 The following covariates were included in our statistical analyses: sex of the child,  
15 urbanicity (urban/rural), region of residence (northern, central, southern and  
16 Mexico City), and maternal education: none, primary, secondary, high school  
17 (*preparatoria* according to its Spanish equivalent) and university (bachelor's degree  
18 and beyond). Benefiting from a food assistance program was also included.  
19  
20  
21  
22  
23  
24  
25  
26

### 27 *Socioeconomic Index*

28  
29  
30 We used a standard socioeconomic status (SES) index developed in Mexico on  
31 the basis of various household characteristics: type of floor, wall and ceiling  
32 materials; the ratio of number of rooms used for sleeping to number of persons  
33 residing in the household; basic service infrastructure including water source and  
34 water disposal; and possession of domestic appliances such as a refrigerator,  
35 washing machine, microwave oven, stove, boiler, radio, television, cable television  
36 signal, telephone and computer. This SES index was selected to facilitate  
37 comparison with previous surveys in Mexico [31].  
38  
39  
40  
41  
42  
43  
44  
45  
46  
47  
48

### 49 *Ethical considerations*

50  
51  
52  
53 All study procedures involving human participants were approved by the Ethics  
54 Committee of the National Institute of Public Health in Mexico. Written informed  
55  
56  
57  
58  
59  
60

1  
2  
3 consent was obtained from all survey participants. Parents/guardians served as  
4  
5 proxies for minors < 7 years.  
6  
7

### 8 9 *Statistical analyses*

10  
11 We calculated the prevalence (95% CI) of each HFI category by socioeconomic  
12  
13 characteristic and maternal-child nutritional status. We then conducted logistic  
14  
15 regression models for stunting and overweight among preschool children and for  
16  
17 stunting and overweight/obesity among schoolchildren, adjusting for pertinent  
18  
19 covariates. The cluster effect for mothers with more than one schoolchild was  
20  
21 tested and proved non-significant. No mothers had more than one preschool child.  
22  
23 Results were expressed as Adjusted Odds Ratios (AORs) with their corresponding  
24  
25 95% confidence intervals. Prevalence estimates and logistic regression models  
26  
27 considered clustered sample effects and sampling weights using STATA 13 SVY  
28  
29 procedures for complex surveys.  
30  
31  
32  
33  
34  
35

### 36 37 **Results**

38  
39 Our analytical sample included 5,087 pairs of mother-preschool children and 7,181  
40  
41 mother-schoolchild pairs with complete data.  
42  
43  
44

45  
46 In the mother-preschool child pairs, moderate HFI was significantly more prevalent  
47  
48 among those residing in the southern, as opposed to the northern or central,  
49  
50 regions of Mexico. As expected, severe HFI was five and six times more prevalent  
51  
52 in the low and very low quintiles, respectively, than in the top quintile. Moderate  
53  
54 and severe HFI were more prevalent in households with mothers who had not  
55  
56  
57  
58  
59  
60

studied beyond junior high school, and with beneficiaries of government food-assistance programs (Table 1).

Similarly, in the mother-schoolchild pairs, general HFI was more prevalent among those living in southern Mexico than among those living in the north. In addition, HFI was higher in the low and very low socioeconomic quintiles. Prevalence of moderate and severe HFI was significantly higher among those pairs where the mothers had not studied beyond junior high school, benefited from government food-assistance programs and belonged to an indigenous population group (Table 1).

**Table 1. FI level according to the socio-demographic characteristics of the mother-preschool child and mother-schoolchild pairs**

|                           | Total<br>n | N*<br>(thousands) | Food Insecurity Level in preschool children |              |      |             |          |             |        |             |
|---------------------------|------------|-------------------|---------------------------------------------|--------------|------|-------------|----------|-------------|--------|-------------|
|                           |            |                   | Secure                                      |              | Mild |             | Moderate |             | Severe |             |
|                           |            |                   | %                                           | 95% CI       | %    | 95% CI      | %        | 95% CI      | %      | 95% CI      |
| <b>Sex of child</b>       |            |                   |                                             |              |      |             |          |             |        |             |
| Female                    | 2539       | 1452.9            | 24.2                                        | (21.7,26.79) | 43.8 | (40.9,46.6) | 21.6     | (19.5,23.8) | 10.5   | (9.0,12.2)  |
| Male                      | 2548       | 1522.1            | 24.7                                        | (22.3,27.13) | 45.0 | (42.4,47.7) | 18.4     | (16.5,20.6) | 11.9   | (10.3,13.8) |
| <b>Urbanicity</b>         |            |                   |                                             |              |      |             |          |             |        |             |
| Urban                     | 3142       | 2123.0            | 26.8                                        | (24.6 ,29.1) | 43.3 | (40.9,45.8) | 18.9     | (17.1,20.9) | 10.9   | (9.4,12.6)  |
| Rural                     | 1945       | 851.9             | 18.5                                        | (16.3,20.9)  | 47.0 | (43.8,50.2) | 22.4     | (20.1,25.0) | 12.0   | (10.3,14.1) |
| <b>Region</b>             |            |                   |                                             |              |      |             |          |             |        |             |
| Northern Mexico           | 1083       | 524.5             | 30.5                                        | (27.2,34.0)  | 42.5 | (38.9,46.2) | 15.8     | (13.3,18.6) | 11.2   | (9.2,13.5)  |
| Central Mexico            | 1804       | 941.8             | 26.7                                        | (24.0,29.6)  | 45.3 | (42.2,48.4) | 17.4     | (15.1,20.0) | 10.6   | (8.8,12.6)  |
| City                      | 200        | 426.5             | 22.1                                        | (15.6,30.4)  | 45.5 | (37.9,53.4) | 21.9     | (16.3,28.8) | 10.5   | (6.3,16.9)  |
| Southern                  | 2000       | 1082.2            | 20.4                                        | (18.1,22.8)  | 44.1 | (41.1,47.1) | 23.4     | (21.2,25.9) | 12.1   | (10.3,14.2) |
| <b>SES</b>                |            |                   |                                             |              |      |             |          |             |        |             |
| Very Low (Q1)             | 1319       | 666.0             | 12.4                                        | (9.9,15.4)   | 45.8 | (41.9,49.6) | 23.8     | (20.8,27.1) | 18.0   | (15.1,21.4) |
| Low (Q2)                  | 1187       | 629.8             | 17.6                                        | (15.0,20.6)  | 43.4 | (39.3,47.7) | 25.1     | (21.5,29.2) | 13.8   | (11.2,16.9) |
| Medium (Q3)               | 1028       | 584.5             | 20.0                                        | (17.1,23.4)  | 48.4 | (44.8,52.1) | 20.3     | (17.3,23.8) | 11.1   | (8.7,14.2)  |
| High (Q4)                 | 879        | 575.7             | 29.1                                        | (25.1,33.5)  | 44.2 | (39.7,48.7) | 18.5     | (15.1,22.4) | 8.2    | (6.2,10.8)  |
| Very High (Q5)            | 674        | 519.0             | 47.7                                        | (42.3,53.2)  | 39.5 | (34.4,44.7) | 10.0     | (7.2,13.6)  | 2.8    | (1.8,4.6)   |
| <b>Maternal Education</b> |            |                   |                                             |              |      |             |          |             |        |             |
| None                      | 349        | 196.4             | 10.0                                        | (6.8,14.4)   | 40.6 | (34.2,47.4) | 24.7     | (19.4,30.9) | 24.7   | (18.9,31.5) |



|                                                  |                |                       |          |                      |          |                    |          |                        |          |                      |
|--------------------------------------------------|----------------|-----------------------|----------|----------------------|----------|--------------------|----------|------------------------|----------|----------------------|
| Primary and/or secondary school                  | 3568           | 1951.6                | 19.1     | (17.4,20.9)          | 46.1     | (43.7,48.5)        | 21.5     | (19.6,23.6)            | 13.3     | (11.8,15.1)          |
| Beyond secondary school                          | 1165           | 823.0                 | 40.4     | (36.4,44.6)          | 41.4     | (37.6,45.3)        | 15.1     | (12.5,18.1)            | 3.0      | (2.0,4.6)            |
| <b>Beneficiaries of Food Assistance Programs</b> |                |                       |          |                      |          |                    |          |                        |          |                      |
| Beneficiaries                                    | 2246           | 1187.1                | 15.7     | (13.6,18.1)          | 45.8     | (42.7,48.8)        | 24.5     | (22.1,27.1)            | 14.0     | (12.0,16.3)          |
| Non-beneficiaries                                | 2400           | 1520.1                | 30.2     | (27.6,33.0)          | 43.8     | (41.1,46.6)        | 16.9     | (14.9,19.1)            | 9.0      | (7.6,10.8)           |
| <b>Indigenous</b>                                |                |                       |          |                      |          |                    |          |                        |          |                      |
| Yes                                              | 101            | 1150.9                | 20.3     | (11.7,32.8)          | 38.3     | (27.8,50.1)        | 29.5     | (20.1,40.9)            | 12.0     | (6.4,21.2)           |
| No                                               | 1906           | 41.9                  | 23.5     | (21.2,25.9)          | 44.1     | (41.2,47.1)        | 20.3     | (18.0,22.9)            | 12.0     | (9.9,14.3)           |
| <b>Food Insecurity Level in schoolchildren</b>   |                |                       |          |                      |          |                    |          |                        |          |                      |
|                                                  | <b>Total n</b> | <b>N* (thousands)</b> | <b>%</b> | <b>Secure 95% CI</b> | <b>%</b> | <b>Mild 95% CI</b> | <b>%</b> | <b>Moderate 95% CI</b> | <b>%</b> | <b>Severe 95% CI</b> |
| <b>Sex of child</b>                              |                |                       |          |                      |          |                    |          |                        |          |                      |
| Female                                           | 4269           | 2413.0                | 23.1     | (21.3,25.1)          | 42.3     | (40.4,44.3)        | 20.1     | (18.4,22.0)            | 14.4     | (12.9,15.9)          |
| Male                                             | 4132           | 2337.1                | 24.0     | (21.9,26.2)          | 43.6     | (41.3,45.9)        | 19.8     | (18.1,21.6)            | 12.6     | (11.1,14.2)          |
| <b>Urbanicity</b>                                |                |                       |          |                      |          |                    |          |                        |          |                      |
| Urban                                            | 5267           | 3444.7                | 26.2     | (24.3,28.1)          | 42.0     | (39.9,43.9)        | 18.4     | (16.8,20.1)            | 13.5     | (12.1,15.1)          |
| Rural                                            | 3134           | 1306.3                | 16.7     | (14.8,18.8)          | 45.8     | (43.2,48.3)        | 24.2     | (22.1,26.4)            | 13.4     | (11.8,15.3)          |
| <b>Region</b>                                    |                |                       |          |                      |          |                    |          |                        |          |                      |
| Northern                                         | 1796           | 884.6                 | 29.5     | (26.4,32.8)          | 42.3     | (39.2,45.4)        | 16.2     | (13.9,18.8)            | 12.0     | (10.2,14.2)          |
| Central Mexico                                   | 2928           | 1446.1                | 25.8     | (23.2,28.5)          | 45.1     | (42.3,47.9)        | 16.8     | (14.8,19.0)            | 12.3     | (10.6,14.2)          |
| City                                             | 353            | 717.3                 | 25.6     | (20.4,31.7)          | 36.2     | (30.4,42.4)        | 21.6     | (16.7,27.5)            | 16.6     | (12.0,22.3)          |
| Southern                                         | 3324           | 1738.9                | 18.0     | (16.2,19.9)          | 44.2     | (42.1,46.5)        | 23.8     | (21.8,25.9)            | 14.0     | (12.4,15.7)          |
| <b>SES</b>                                       |                |                       |          |                      |          |                    |          |                        |          |                      |
| Very Low (Q1)                                    | 1977           | 980.7                 | 9.6      | (7.9,11.6)           | 42.5     | (39.1,46.1)        | 26.2     | (23.3,29.4)            | 21.7     | (18.7,25.1)          |
| Low (Q2)                                         | 1874           | 947.06                | 15.0     | (12.9,17.5)          | 39.6     | (36.3,42.9)        | 25.5     | (22.4,28.9)            | 19.9     | (17.1,22.9)          |
| Medium (Q3)                                      | 1717           | 914.6                 | 16.0     | (13.6,18.7)          | 50.5     | (46.8,54.2)        | 19.7     | (17.1,22.6)            | 13.9     | (11.5,16.6)          |
| High (Q4)                                        | 1583           | 995.9                 | 29.8     | (26.4,33.4)          | 43.8     | (40.4,47.2)        | 17.4     | (14.7,20.5)            | 9.05     | (7.3,11.1)           |
| Very High (Q5)                                   | 1250           | 912.7                 | 48.2     | (43.8,52.7)          | 38.5     | (34.7,42.4)        | 10.7     | (8.0,14.1)             | 2.6      | (1.6,4.4)            |
| <b>Maternal Education</b>                        |                |                       |          |                      |          |                    |          |                        |          |                      |
| None                                             | 651            | 339.1                 | 13.4     | (10.0,17.7)          | 40.9     | (35.8,46.2)        | 21.6     | (17.6,26.1)            | 24.1     | (19.5,29.5)          |
| Primary and/or secondary school                  | 5970           | 3212.5                | 18.7     | (17.2,20.3)          | 44.0     | (41.9,45.9)        | 22.0     | (20.4,23.7)            | 15.4     | (13.9,16.9)          |
| Beyond secondary school                          | 1780           | 1199.4                | 39.5     | (35.9,43.1)          | 41.0     | (37.8,44.4)        | 14.1     | (11.8,16.8)            | 5.4      | (4.2,6.9)            |
| <b>Beneficiaries of Food Assistance Programs</b> |                |                       |          |                      |          |                    |          |                        |          |                      |
| Beneficiaries                                    | 4527           | 2362.1                | 16.5     | (14.9,18.2)          | 44.9     | (42.5,47.3)        | 22.2     | (20.5,24.1)            | 16.4     | (14.6,18.4)          |
| Non-beneficiaries                                | 3299           | 2032.0                | 30.8     | (28.2,33.4)          | 41.6     | (39.1,44.1)        | 17.4     | (15.4,19.6)            | 10.2     | (8.8,11.9)           |
| <b>Indigenous</b>                                |                |                       |          |                      |          |                    |          |                        |          |                      |
| Yes                                              | 595            | 228.1                 | 10.8     | (8.0,14.3)           | 44.4     | (39.2,49.8)        | 26.1     | (21.8,30.9)            | 18.7     | (14.7,23.5)          |
| No                                               | 7806           | 4522.9                | 24.2     | (22.7,25.8)          | 42.9     | (41.2,44.5)        | 19.7     | (18.3,21.1)            | 13.2     | (12.1,14.5)          |

\* N refers to the sample population size.

1  
2  
3 Table 2 describes the nutritional status of the population by household food  
4 security/insecurity level. Stunting in preschool children was more prevalent in  
5  
6 households with severe/moderate HFI (over 16% respectively) than in those with  
7  
8 mild (13.2%) or no HFI (10.7%). Likewise, wasting was more prevalent in  
9  
10 households with severe (3.7%) than in those with mild (1.7%), moderate (1.9%) or  
11  
12 no HFI (2.2%).  
13  
14  
15  
16

17  
18 Preschool children presented no significant differences in prevalence of overweight  
19  
20 by HFI level.  
21  
22

23  
24 While prevalence of stunting among schoolchildren was 10% in households with  
25  
26 severe HFI, prevalence of overweight/obesity was markedly higher in households  
27  
28 with food security (40%) as compared to households with mild (34.5%), moderate  
29  
30 (32.1%) or severe (28.6%) HFI. Prevalence of maternal obesity was high  
31  
32 regardless of HFI status: > 70% overall and 77% in mild HFI households.  
33  
34  
35  
36  
37  
38  
39  
40  
41  
42  
43  
44  
45  
46  
47  
48  
49  
50  
51  
52  
53  
54  
55  
56  
57  
58  
59  
60

Table 2. Prevalence of nutritional status by level of food insecurity

1  
2  
3  
4  
5  
6  
7  
8  
9  
10  
11  
12  
13  
14  
15  
16  
17  
18  
19  
20  
21  
22  
23  
24  
25  
26  
27  
28  
29  
30  
31  
32  
33  
34  
35  
36  
37  
38  
39  
40  
41  
42  
43  
44  
45  
46  
47  
48  
49

| Nutritional status     | Food Insecurity in Preschool-Age Children |      |             |               |      |             |               |      |             |               |             |             |
|------------------------|-------------------------------------------|------|-------------|---------------|------|-------------|---------------|------|-------------|---------------|-------------|-------------|
|                        | Food Security                             |      |             | Mild          |      |             | Moderate      |      |             | Severe        |             |             |
|                        | N (thousands)                             | %    | (95% IC)    | N (thousands) | %    | (95% IC)    | N (thousands) | %    | (95% IC)    | N (thousands) | %           | (95% IC)    |
| Underweight            | 8.3                                       | 1.1  | (0.6,2.1)   | 40.6          | 3.0  | (2.3,4.1)   | 18.8          | 3.1  | (2.2,4.6)   | 15.8          | 4.7         | (2.7,8.1)   |
| Stunting               | 77.6                                      | 10.7 | (8.6,13.2)  | 175.4         | 13.2 | (11.4,15.4) | 96.2          | 16.2 | (13.1,19.8) | 56.0          | 16.8        | (12.8,21.6) |
| Wasting                | 15.8                                      | 2.2  | (1.1,4.1)   | 23.1          | 1.7  | (1.0,2.8)   | 11.1          | 1.9  | (1.1,3.1)   | 12.5          | 3.7         | (2.0,6.9)   |
| Overweight             | 75.9                                      | 11.0 | (8.8,13.5)  | 120.7         | 9.7  | (8.2,11.5)  | 47.6          | 8.3  | (6.1,11.2)  | 31.5          | 9.6         | (6.8,13.3)  |
| Nutritional status     | Food Insecurity in Schoolers              |      |             |               |      |             |               |      |             |               |             |             |
|                        | Food Security                             |      |             | Mild          |      |             | Moderate      |      |             | Severe        |             |             |
|                        | N (thousands)                             | %    | (95% IC)    | N (thousands) | %    | (95% IC)    | N (thousands) | %    | (95% IC)    | N (thousands) | %           | (95% IC)    |
| Stunting               | 48.4                                      | 4.4  | (3.3,5.8)   | 128.7         | 6.4  | (5.4,7.4)   | 75.8          | 8.0  | (6.3,10.3)  | 64.2          | 10.1<br>0.1 | (7.9,12.7)  |
| Overweight             | 250.4                                     | 23.0 | (20.4,25.7) | 377.2         | 18.9 | (17.2,20.8) | 161.3         | 17.4 | (15.1,19.9) | 112.5         | 17.8        | (14.9,21.0) |
| Obesity                | 190.6                                     | 17.5 | (15.1,20.2) | 310.8         | 15.6 | (14.0,17.3) | 136.4         | 14.7 | (12.5,17.3) | 68.6          | 10.8        | (8.3,14.0)  |
| Overweight and Obesity | 441.0                                     | 40.4 | (37.3,43.7) | 688.0         | 34.5 | (32.3,36.8) | 297.7         | 32.1 | (28.9,35.5) | 181.1         | 28.6        | (24.8,32.6) |
| Nutritional status     | Food Insecurity in Women                  |      |             |               |      |             |               |      |             |               |             |             |
|                        | Food Security                             |      |             | Mild          |      |             | Moderate      |      |             | Severe        |             |             |
|                        | N (thousands)                             | %    | (95% IC)    | N (thousands) | %    | (95% IC)    | N (thousands) | %    | (95% IC)    | N (thousands) | %           | (95% IC)    |

1  
2  
3  
4  
5  
6  
7  
8  
9  
10  
11  
12  
13  
14  
15  
16  
17  
18  
19  
20  
21  
22  
23  
24  
25  
26  
27  
28  
29  
30  
31  
32  
33  
34  
35  
36  
37  
38  
39  
40  
41  
42  
43  
44  
45  
46  
47  
48  
49

|                        | N (thousands) | %    | (95% IC)    |
|------------------------|---------------|------|-------------|---------------|------|-------------|---------------|------|-------------|---------------|------|-------------|
| Underweight            | 20.9          | 1.2  | (0.6,2.1)   | 22.7          | 0.69 | (0.5,0.9)   | 19.1          | 1.2  | (0.6,2.5)   | 12.9          | 1.3  | (0.8,2.3)   |
| Overweight             | 683.5         | 37.9 | (35.1,40.7) | 1301.7        | 39.8 | (37.7,41.9) | 563.9         | 37.2 | (33.9,40.8) | 344.7         | 35.6 | (31.9,39.5) |
| Obesity                | 589.9         | 32.7 | (29.9,35.5) | 1206.9        | 36.9 | (34.9,38.9) | 584.1         | 38.6 | (35.3,41.9) | 365.7         | 37.8 | (33.6,42.3) |
| Overweight and Obesity | 1273.4        | 70.5 | (67.7,73.3) | 2508.7        | 76.7 | (74.8,78.6) | 1148.0        | 75.9 | (73.1,78.4) | 710.4         | 73.5 | (69.8,76.8) |

\* N refers to the sample population size.

- (1) Z-score cut-off point of <-2 standard deviations to classify low weight-for-age, WHO
- (2) Z-score cut-off point of <-2 standard deviations to classify low height-for-age, WHO
- (3) Z-score cut-off point of <-2 standard deviations to classify low weight-for-height-, WHO
- (4) Z-score cut-off point of >+2 standard deviations to classify body mass index (BMI)-for-age, WHO
- (5) Z-score cut-off point of >+1 and ≤+2 standard deviations to classify body mass index (BMI)-for-age, WHO
- (6) BMI <18.5 kg/m<sup>2</sup>
- (7) BMI 25-29.9 kg/m<sup>2</sup>
- (8) BMI ≥ 30 kg/m<sup>2</sup>

In the logistic regression model for preschool children, prevalence of stunting was significantly higher (AOR>1,  $p<0.05$ ) in households with moderate or severe HFI as opposed to mild HFI (Table 3).

**Table 3. Logistic regression model for mother-preschool child pairs: Stunting in children < 5 years old**

|                                            | AOR* | p-value | 95% CI     |
|--------------------------------------------|------|---------|------------|
| Mild HFI                                   | 1.26 | 0.232   | (0.9,1.8)  |
| Moderate HFI                               | 1.66 | 0.036   | (1.0, 2.7) |
| Severe HFI                                 | 1.99 | 0.007   | (1.2,3.3)  |
| Maternal obesity                           | 1.40 | 0.266   | (0.8,2.5)  |
| Mild HFI and maternal obesity              | 0.62 | 0.207   | (0.3,1.3)  |
| Moderate HFI and maternal obesity          | 0.46 | 0.069   | (0.2,1.1)  |
| Severe HFI and maternal obesity            | 0.23 | 0.011   | (0.1,0.7)  |
| Age of children                            | 0.89 | 0.007   | (0.8,0.9)  |
| Beneficiaries of food assistance programs  | 1.24 | 0.119   | (0.9,1.6)  |
| <b>Urbanicity</b>                          |      |         |            |
| Rural                                      | 1.42 | 0.006   | (1.1,1.8)  |
| <b>Maternal Education</b>                  |      |         |            |
| Primary school                             | 0.53 | <0.001  | (0.4,0.8)  |
| Secondary school                           | 0.46 | 0.001   | (0.3,0.7)  |
| Senior high school ( <i>Preparatoria</i> ) | 0.34 | <0.001  | (0.2,0.6)  |
| Bachelor or higher                         | 0.48 | 0.042   | (0.2,0.9)  |
| Const                                      | 0.26 | <0.001  | (0.2,0.4)  |

\*Model included all independent variables listed in the table.

We identified an interaction between HFI and maternal obesity. Estimated marginal prevalence rates and confidence intervals obtained from the logistic regression model are plotted in Figure 1. Severe HFI raises the risk of stunting in children with non-obese mothers but not in children with obese mothers. Preschool children showed no significant interaction between HFI, overweight and maternal characteristics.

For schoolchildren, the logistic regression model revealed a significantly lower prevalence of overweight and obesity among those with mild, moderate or severe HFI ( $p < 0.05$ ) (Table 4), mothers having higher levels of education (bachelor's and beyond) ( $p < 0.001$ ), and residence in rural areas ( $p = 0.007$ ).

The logistic regression model for stunting in schoolchildren documented significant associations of this condition with maternal characteristics but not with HFI (data not shown).

**Table 4. Logistic regression model for mother-schoolchild pairs: both mother and child with overweight/obesity: Overweight and obesity in schoolchildren**

|                                            | AOR* | p- value | 95% CI      |
|--------------------------------------------|------|----------|-------------|
| Mild HFI                                   | 0.79 | 0.017    | (0.6,0.9)   |
| Moderate HFI                               | 0.72 | 0.005    | (0.57,0.90) |
| Severe HFI                                 | 0.67 | 0.004    | (0.51,0.9)  |
| Maternal Overweight                        | 2.25 | <0.001   | (1.8,2.8)   |
| Maternal Obesity                           | 3.96 | <0.001   | (3.3,4.8)   |
| Age of child                               |      |          |             |
|                                            | 1.12 | <0.001   | (1.1,1.2)   |
| Beneficiaries of food assistance programs  | 0.85 | 0.039    | (0.7,0.9)   |
| <b>Urbanicity</b>                          |      |          |             |
| Rural                                      | 0.79 | 0.007    | (0.7,0.9)   |
| <b>Maternal Education</b>                  |      |          |             |
| Primary school                             | 0.87 | 0.342    | (0.6,1.2)   |
| Secondary school                           | 1.11 | 0.484    | (0.8,1.5)   |
| Senior high school ( <i>Preparatoria</i> ) | 1.12 | 0.485    | (0.8,1.6)   |
| Bachelor or higher                         | 1.93 | <0.001   | (1.3,2.9)   |
| Const                                      | 0.12 | <0.001   | (0.1,0.2)   |

\*Model included all independent variables listed in table.

## Discussion

We sought to describe the nutritional status of <11-year-old-children and their mothers, and to explore the relationship between their nutritional status and HFI. One of the strengths of this study concerns the fact that our research sample was representative of the Mexican population.

Many countries are witnessing an increase in the prevalence of adult overweight while still struggling with childhood stunting. Our study found that moderate and severe HFI were associated with low height in children who were under five and lived with mothers with overweight or obesity. Similar results have been obtained by other studies on the double burden of malnutrition, where stunted children live with overweight mothers in the same, and particularly in poor, households [32-33]. The problem has been analyzed at the household and individual levels both globally and within a number of countries, Mexico among them [34].

Studies conducted in the Latin American and Arctic regions have demonstrated that FI households exhibit not only a reduced variety of available food, but also inadequate consumption of fruits and vegetables [35] and foods of animal origin [36-37]. These findings have been explained by insufficient local food availability as well as the presence of inferior-quality, high-cost foods, both of which favor the choice of widely available cheaper foods of low nutritional value [38]. It has been reported that FI in Mexico has similar effects to those observed in the rest of Latin America as regards dietary diversity and food availability. Mexican children under five are not receiving the recommended daily energy intake [39] and female heads of household show diminished dietary diversity [40].

1  
2  
3 Evidence from a study of < 5 children of Mexican origin living in immigrant  
4 communities in California and in Mexico itself underscores the fact that FI  
5 contributes not only to increased energy and fat intake as a result of consuming  
6 cheap and energy-rich foods such as snacks, sweets and fried foods, but also to  
7 increased consumption of meat, especially fried chicken. For children living in  
8 Mexico, FI was associated with low consumption of carbohydrates, dairy products  
9 and vitamin B6 [41].  
10

11  
12 The pathway through which FI can lead to an increase in body fat is based on the  
13 following factors: (1) Diets characterized by high quantities of fat and  
14 carbohydrates together with a limited variety of vegetables are associated with high  
15 energy intake and a subsequent increase in body fat [42,43]. (2) According to one  
16 hypothesis, involuntary restriction of food including episodic lack of access can  
17 lead to compulsive eating and to ignoring internal signs of satiety [44], as well as to  
18 physiological adaptations in response to the periodic scarcity of food [17].  
19

20  
21 Conversely, our study demonstrated an association between FI and stunting  
22 among Mexican preschool children. The way in which FI negatively affects the  
23 nutritional state of these children relates largely to insufficient consumption of  
24 highly nutritious foods (such as products of animal origin, fruits and vegetables)  
25 coupled with recurrent infections and unhealthy living conditions linked to poverty.  
26 These factors contribute to loss of appetite, an increase in metabolic requirements  
27 and a deficit of nutrients [45].  
28

29  
30 Our results agree with those of a previous study where children from HFI  
31 households weighed less than their peers from food-secure households. Their  
32  
33  
34  
35  
36  
37  
38  
39  
40  
41  
42  
43  
44  
45  
46  
47  
48  
49  
50  
51  
52  
53  
54  
55  
56  
57  
58  
59  
60



1  
2  
3 average body weight was within the normal range, whereas their peers were at risk  
4  
5 of becoming overweight.  
6  
7

8  
9 Adequate growth is not the only indicator of nutritional well-being among children  
10  
11 living with HFI [36]. Nutritional status is also influenced by the quality of foods  
12  
13 consumed. It has been demonstrated that obesity is an expected consequence of  
14  
15 HFI for some subpopulations and at certain ages. Moreover, it has been shown  
16  
17 that children and adolescents are often affected by HFI through both nutritional and  
18  
19 non-nutritional pathways despite parental intentions or beliefs to the contrary [46].  
20  
21  
22  
23

24 A recent analysis of 16 Latin American countries revealed that all of them were  
25  
26 running programs aimed at preventing undernutrition, and most were in the  
27  
28 process of implementing obesity prevention strategies as part of their policy  
29  
30 agendas [47]. According to the literature, cash transfers and food distribution  
31  
32 programs may be triggering increased energy intake at the household level [48,49]  
33  
34 and exacerbating the HFI-obesity link in populations that do not need assistance  
35  
36 programs focused on caloric intake. This has raised concerns about the possible  
37  
38 contribution of these programs to obesity in populations who are not energy  
39  
40 deficient, and highlights the need for countries with a double burden of malnutrition  
41  
42 to include obesity prevention strategies as an essential component of their cash  
43  
44 and food transfer programs.  
45  
46  
47  
48

49  
50 The principal findings of our study are particularly relevant for countries undergoing  
51  
52 nutritional transition. Mexico has been facing rapid epidemiological and  
53  
54 demographic changes with nutritional and environmental components. The health  
55  
56  
57  
58  
59  
60

1  
2  
3 profile of the Mexican population indicates a shift from high rates of mortality and  
4 infectious diseases - typical of poor countries - to low rates of mortality and high  
5 rates of non-communicable diseases - the main cause of mortality in wealthy  
6 countries [50].  
7  
8  
9  
10

11  
12  
13 Our study was subject to several limitations. First, its cross-sectional design  
14 restricts the drawing of causal inferences. Additionally, its findings refer specifically  
15 to Mexican children, adolescents and similar population groups, and therefore  
16 cannot be generalized to others.  
17  
18  
19  
20  
21  
22

23  
24 Nevertheless, our study also has a number of strengths. For instance, our findings  
25 contribute to the limited research available on the relationship between HFI and the  
26 nutritional status of mother-child pairs. In addition, this is one of the first studies in  
27 this field dealing specifically with the Mexican population. The large sample size of  
28 our study constitutes another strength. It allowed us to introduce possible  
29 confounders in the statistical models and to provide evidence useful at the national  
30 level.  
31  
32  
33  
34  
35  
36  
37  
38  
39  
40

41 In order to develop effective and integral nutritional strategies, policymakers need  
42 to recognize the apparently contradictory presence of adult overweight/obesity and  
43 childhood stunting in the same household and understand its association with HFI.  
44 For households at different HFI levels to experience an actual improvement in their  
45 nutritional status, efforts to abate overnutrition, undernutrition and inadequate  
46 dietary quality must be rooted in this knowledge.  
47  
48  
49  
50  
51  
52  
53  
54  
55  
56  
57  
58  
59  
60

1  
2  
3 Interestingly, our study found that, in preschool children, HFI severity increased the  
4 risk of stunting only if their mothers were not obese. This may be explained by the  
5 growth of urbanization resulting in higher household incomes and greater food  
6 availability, but only as regards quantity, not quality [51]. The foods available to  
7 poor urban households are likely to be energy-rich but nutrient-poor. The presence  
8 of non-obese mothers in FI households may indicate a dearth of adequate quality  
9 food for children redounding in micronutrient deficiencies and protein quality issues  
10 that hinder their growth - particularly in relation to height. By contrast, the presence  
11 of maternal obesity in FI households may indicate greater access to the calories  
12 and nutrients needed for adequate child development, and may also account for  
13 the lower prevalence of stunting in these homes. This may explain the relative lack  
14 of any relationship of stunting to HFI severity in households with obese mothers.  
15  
16  
17  
18  
19  
20  
21  
22  
23  
24  
25  
26  
27  
28  
29  
30  
31

## 32 **Conclusions**

33  
34  
35 The double burden of malnutrition in Mexico occurs most notably among mother-  
36 child pairs living with HFI. Crafting a sound approach to combat malnutrition is  
37 complex because of its multi-dimensional nature [52]. These conditions hamper the  
38 implementation of effective measures capable of protecting vulnerable population  
39 groups and ensuring adequate livelihoods. Policies and programs must tackle  
40 chronic undernutrition and overnutrition according to the food and nutritional needs  
41 of each age group, rather than assuming that their needs will be met by targeting  
42 the household as a homogenous unit. Consistent with other studies, our work  
43 highlights the importance of monitoring household food security based on  
44  
45  
46  
47  
48  
49  
50  
51  
52  
53  
54  
55  
56  
57  
58  
59  
60

1  
2  
3 experience-related scales such as ELCSA. These have proved highly useful for  
4  
5 food security governance [53].  
6  
7  
8  
9  
10

### 11 12 **List of abbreviations**

13  
14 BMI - Body Mass Index

15  
16 ELCSA - Latin American and Caribbean Food Security Scale

17  
18 ENSANUT 2012 - Mexican National Health and Nutrition Survey in Latin American

19  
20 HFI - Household Food Insecurity

21  
22 WHO - World Health Organization  
23  
24

### 25 26 **Declarations**

#### 27 28 **Ethics approval and consent to participate**

29  
30 All study procedures involving human participants were approved by the Ethics  
31  
32 Committee of the National Institute of Public Health in Mexico. Written informed  
33  
34 consent was obtained from all survey participants, with parents serving as proxies  
35  
36 of minors under seven years.  
37  
38  
39

#### 40 41 **Availability of data and materials**

42  
43 [https://drive.google.com/a/cimat.mx/folderview?id=0BzGYRm5Poz8OdWhGWUha](https://drive.google.com/a/cimat.mx/folderview?id=0BzGYRm5Poz8OdWhGWUhadENBSDA&usp=sharing)  
44  
45 [dENBSDA&usp=sharing](https://drive.google.com/a/cimat.mx/folderview?id=0BzGYRm5Poz8OdWhGWUhadENBSDA&usp=sharing)  
46

#### 47 48 **Competing interests**

49  
50 The authors declared no conflict of interest.

#### 51 52 **Funding**

53  
54 The National Health and Nutrition Survey (*ENSANUT 2012*) was funded by the  
55  
56 Mexican Ministry of Health.  
57

#### 58 59 **Authors' contributions** 60

1  
2  
3 The responsibilities of the authors were distributed as follows: TSL and IMGH  
4 contributed to data analysis and interpretation. They drafted the manuscript based  
5 on the input and feedback of all the co-authors. VMR, LCN and MCMR contributed  
6 to the study design and critical review of the manuscript. TSL and RPE contributed  
7 to the study design, interpretation of results and critical review of the manuscript.  
8 All the authors read and approved the final version of the manuscript.  
9  
10  
11  
12  
13  
14  
15  
16

### 17 **Acknowledgments**

18  
19 The authors wish to thank Erick Mauricio Rolando López for his support in  
20 developing the tables. They also gratefully acknowledge the staff of the National  
21 Health and Nutrition Survey 2012 who made this work possible.  
22  
23  
24  
25  
26  
27  
28  
29  
30  
31  
32  
33  
34

### 35 **References**

- 36  
37 1. Food and Agriculture Organization FAO. Food security statistics home.  
38 <http://www.fao.org/economic/ess/ess-fs/en/> 2016. Accessed April 14, 2016.
- 39  
40 2. Food and Agriculture Organization, International Fund for Agricultural  
41 Development, World Food Programme. The state of food insecurity in the  
42 world 2014. Strengthening the enabling environment for food security and  
43 nutrition. Rome, Italy, 2014.
- 44  
45 3. UN Millennium Project 2005. Halving hunger: it can be done. Task Force on  
46 Hunger, 2005. [http://www.unmillenniumproject.org/documents/Hunger-](http://www.unmillenniumproject.org/documents/Hunger-lowres-complete.pdf)  
47 [lowres-complete.pdf](http://www.unmillenniumproject.org/documents/Hunger-lowres-complete.pdf). Accessed April 14, 2016.
- 48  
49 4. Jones AD, Ngure FM, Pelto G, Young SL. What are we assessing when we  
50 measure food security? A compendium and review of current metrics. *Adv*  
51 *Nutr.* 2013;4:481-505.
- 52  
53 5. Pérez-Escamilla R, Melgar-Quiñonez H, Nord M, Álvarez MC, Segall-  
54 Correa AM. Escala latinoamericana y caribeña de seguridad alimentaria  
55 (ELCSA). In Memorias de la 1ª Conferencia en América Latina y el Caribe  
56  
57  
58  
59  
60

- 1  
2  
3 sobre la medición de la seguridad alimentaria en el hogar. *Perspectivas en*  
4 *Nutrición Humana*. 2007; Suppl 1:117-34.  
5  
6 6. Barrett, C. B. (2010). Measuring food insecurity. *Science*, 327(5967), 825-  
7 828.  
8  
9 7. Shamah-Levy T, Mundo-Rosas V, Rivera-Dommarco JA. Magnitude of food  
10 insecurity in Mexico: its relationship with nutritional status and  
11 socioeconomic factors. *Salud Publica Mex* 2014;56 suppl 1:S79-S85.  
12  
13 8. Martin KS, Ferris AM. Food insecurity and gender are risk factors for  
14 obesity. *J Nut Educ Behav*. 2007;39:31-36.  
15  
16 9. Townsend MS, Peerson J, Love B, Achterberg C, Murphy SP. Food  
17 insecurity is positively related to overweight in women. *J Nutr*.  
18 2001;131:1738-1745.  
19  
20 10. Adams EJ, Grummer-Strawn L, Chavez G. Food insecurity is associated  
21 with increased risk of obesity in California women. *J Nutr*. 2003;133:1070-  
22 1074.  
23  
24 11. Morales-Ruán MC, Méndez-Gómez Humarán I, Shamah-Levy T,  
25 Valderrama-Álvarez Z, Melgar-Quiñónez H. Food insecurity is associated  
26 with obesity in adult women of Mexico. *Salud Publica Mex*. 2014; 56 Suppl  
27 1:54-61.  
28  
29 12. Hanson KL, Sobal J, Frongillo EA. Gender and Marital Status Clarify  
30 Associations between food insecurity and body weight. *J Nutr*. 2007;  
31 137:1460–1465.  
32  
33 13. Nord M, Andrews M, Carlson S. Household food security in the US, 2008.  
34 US Department of Agriculture. Economic Research Service. Washington  
35 DC: 2009.  
36  
37 14. Healthy Eating Research A National Program of the Robert Wood Johnson  
38 Foundation. Food Insecurity and Risk for Obesity Among Children and  
39 Families: Is There a Relationship?. Healthy Eating Research Building  
40 evidence to prevent childhood obesity. A Research Synthesis, April 2010.  
41  
42 15. Pérez-Escamilla R, Obbagy JE, Altman JM, Essery EV, McGrane MM,  
43 Wong YP, Spahn JM, Williams CL. Dietary energy density and body weight  
44 in adults and children: a systematic review. *J Acad Nutr Diet*. 2012;  
45 112:671-84.  
46  
47 16. Drewnowski A, Specter SE. Poverty and obesity: the role of energy density  
48 and energy costs. *Am J Clin. Nutr*. 2004;79:6-16.  
49  
50 17. Dietz, W. Does hunger cause obesity? *Pediatrics*. 1995;96:766-767.  
51  
52 18. Barquera S, Campos-Nonato I, Hernández-Barrera L, Pedroza-Tobías A,  
53 Rivera-Dommarco JA. Prevalence of obesity in Mexican adults 2000-2012.  
54 *Salud Publica Mex*. 2013;55 Suppl 2:151-160.  
55  
56  
57  
58  
59  
60

19. Cuevas-Nasu L, Rivera-Dommarco JA, Shamah-Levy T, Mundo-Rosas V, Méndez-Gómez Humarán I. Food insecurity and nutritional status of pre-school children in Mexico. *Salud Publica Mex.* 2014;56 Suppl 1:47-53.
20. Black RE, Victora CG, Walker SP, Bhutta ZA, Christian P, de Onis M, et al. Maternal and child undernutrition and overweight in low-income and middle-income countries. *Lancet.* 2013;382:427–51.
21. Romero-Martínez M, Shamah-Levy T, Franco-Núñez A, Villalpando S, Cuevas-Nasu L, Gutiérrez JP, Rivera J. National Health and Nutrition Survey 2012: design and coverage. *Salud Publica Mex.* 2013;55 Suppl 2:332-340.
22. Perez-Escamilla R, Melgar-Quiñonez H, Nord M, Álvarez MC, Segall-Correa AM. Escala Latinoamericana y Caribeña de Seguridad Alimentaria (ELCSA). Memorias de la 1a. Conferencia en América Latina y el Caribe sobre la medición de la seguridad alimentaria en el hogar. *Perspectivas en Nutrición Humana.* 2007;(S):117-34.
23. Pérez-Escamilla R, Segall-Corrêa AM, Kurdian Maranhã L, Sampaio M de F, Marín-León L, Panigassi G. 2004. An adapted version of the U.S. Department of Agriculture Food Insecurity module is a valid tool for assessing household food insecurity in Campinas, Brazil. *J.Nutr.*134(8):1923-8.
24. Pérez-Escamilla R, Parás P, Acosta MJ, Peyrou S, Nord M, Hromi-Fiedler A. 2011. Are the Latin American and Caribbean Food Security Scale (ELCSA) items comparable across countries? *FASEB J*, 25:226.8.
25. Álvarez MC, Melgar-Quiñonez H, Estrada A, Vélez OL. 2008. Validación interna y externa de la escala Latinoamericana y Caribeña para la medición de la Seguridad Alimentaria en el Hogar. Editorial Divergráficas. Medellín.
26. Lohman T, Roche AF, and Martorell R. Anthropometric standardization reference manual: Abridged edition. Champaign, IL: Human Kinetics Books. 1988.
27. Habicht JP. Standardization of quantitative epidemiological methods in the field. *Pan Am Sanit Bur.* 1974;76:375-384.
28. World Health Organization. WHO child growth standards: length/height-for-age, weight-for-age, weight-for-length, weight-for-height and body mass index-for-age: methods and development. 2006. [http://www.who.int/childgrowth/standards/Technical\\_report.pdf](http://www.who.int/childgrowth/standards/Technical_report.pdf). Accessed April 19, 2016.
29. Onis MD, Onyango AW, Borghi E, Siyam A, Nishida C, Siekmann J. Development of a WHO growth reference for school-aged children and adolescents. *Bull World Health Organ.* 2007;85:660-667.
30. World Health Organization. Obesity: preventing and managing the global epidemic. Report of a WHO consultation. 2000.

[http://www.who.int/nutrition/publications/obesity/WHO\\_TRS\\_894/en/](http://www.who.int/nutrition/publications/obesity/WHO_TRS_894/en/).

Accessed April 19, 2016.

31. Gutiérrez JP, Rivera-Dommarco J, Shamah-Levy T, Villalpando-Hernández S, Franco A, Cuevas-Nasu L, Romero-Martínez M, Hernández-Ávila M. Encuesta Nacional de Salud y Nutrición 2012. Resultados Nacionales. Cuernavaca, México: Instituto Nacional de Salud Pública (MX), 2012.pp 137-138.
32. Popkin BM. Global nutrition dynamics: the world is shifting rapidly toward a diet linked with noncommunicable diseases. *Am J Clin Nutr*. 2006;84:289-98.
33. Gubert MB, Spaniol AM, Segall-Corrêa AM, Pérez-Escamilla R. Understanding the Double Burden of Malnutrition in Food Insecure Households in Brazil. *Maternal Child Nutr*. 2016 [Epub ahead of print].
34. Kroker-Lobos MF, Pedroza-Tobias A, Pedraza LS, Rivera JA. The double burden of undernutrition and excess body weight in Mexico. *Am J Clin Nutr*. 2014;100:1652–8. doi: 10.3945/ajcn.114.083832.
35. Kaiser LL, Melgar-Quiñonez H, Townsend MS, Nicholson Y, Fujii ML, Martin AC, Lamp CL. Food Insecurity and food supplies in Latino households with Young Children. *J Nutr Educ Behav*. 2003;35(3):148-53.
36. Segall Correa AM, Panigass G, Archanjo Sampaio MF, Marin-Leon L, Perez-Escamilla R. Validación de instrumento de medida de la inseguridad alimentaria y hambre en el contexto de las políticas brasileñas de combate al hambre. Memorias de la 1ª Conferencia en América Latina y el Caribe sobre la medición de la seguridad alimentaria en el hogar. *Perspectivas en Nutrición Humana*. 2007;(S):89-102
37. Hackett M, Melgar-Quiñonez H, Zubieta AC, Hernandez K. Food Security and Household Food Supplies in Rural Ecuador. *Arch Latinoam Nutr*. 2007;57(1):10-17.
38. Huet C, Rosol R, Egeland G. The Prevalence of Food Insecurity Is High and the Diet Quality Poor in Inuit Communities. *J. Nutr*. 2012. doi: 10.3945/jn.111.149278.
39. Mundo-Rosas V, De la Cruz-Góngora V, Jiménez-Aguilar A, Shamah-Levy T. Diversidad de la dieta y consumo de nutrimentos en niños de 24 a 59 meses de edad y su asociación con inseguridad alimentaria. *Salud Publica Mex* 2014;56: s39-s46.
40. Melgar-Quinonez H, Zubieta AC, Valdez E, Whitelaw B, Kaiser L. Validation of an instrument to monitor food insecurity in Sierra de Manantlán, Jalisco. *Salud Pública Mex*. 2005;47(6):413-22.
41. Rivera JA, Pedraza LS, Martorell R, Gil A. Introduction to the double burden of undernutrition and excess weight in Latin America. *Am J Clin Nutr*. 2014;100 Suppl:1613-1616.



- 1  
2  
3  
4  
5  
6  
7  
8  
9  
10  
11  
12  
13  
14  
15  
16  
17  
18  
19  
20  
21  
22  
23  
24  
25  
26  
27  
28  
29  
30  
31  
32  
33  
34  
35  
36  
37  
38  
39  
40  
41  
42  
43  
44  
45  
46  
47  
48  
49  
50  
51  
52  
53  
54  
55  
56  
57  
58  
59  
60
42. McCrory MA, Fuss PJ, McCallum JE, Yao M, Vinken AG, Hays NP, et al. Dietary variety within food groups: association with energy intake and body fatness in men and women. *Am J Clin Nutr* 1999;69:440–7.
  43. Matheson DM, Varady J, Varady A, Killen JD. Household food security and nutritional status of Hispanic children in the fifth grade. *Am J Clin Nutr*. 2002;76:210-217.
  44. Townsend M, Peerson J, Love B, Achterberg C, Murphy S. Food Insecurity Is Positively Related to Overweight in Women. *J. Nutr.*, 2001. 131: 1738–1745.
  45. Caulfield E, Richard S, Rivera JA, Musgrove P, Black R. Stunting, Wasting, and Micronutrient Deficiency Disorders. In: Disease Control Priorities in Developing Countries. Jamison DT, Breman JG, Measham AR, et al., editors. Washington (DC): The International Bank for Reconstruction and Development / The World Bank; New York: Oxford University Press; 2006.
  46. Frongillo EA. Confronting myths about household food insecurity and excess weight. *Cad Saúde Pública*. 2013;29:229-230.
  47. Fanzo J, Pronyk P, Dasgupta A, Towle M, Menon V, Denning G, Zycherman RF, Roth GI. An evaluation of progress toward the Millennium Development Goal One Hunger Target: A country-level, food and nutrition security perspective. Center for Global Health and Economic Development. The Earth Institute of Columbia University. [http://millenniumvillages.org/wp-content/uploads/2010/01/Evaluation-of-Progress\\_Fanzo.pdf](http://millenniumvillages.org/wp-content/uploads/2010/01/Evaluation-of-Progress_Fanzo.pdf). 2010. Accessed jun 21, 2016.
  48. Dinour LM, Bergen D, Yeh M. The food insecurity–obesity paradox: a review of the literature and the role food stamps may play. *J Am Diet Assoc*. 2007;107:1952-1961.
  49. Leroy JL, Gadsden P, Rodríguez-Ramírez S, González de Cossío T. Cash and in-kind transfers in poor rural communities in Mexico increase household fruit, vegetable, and micronutrient consumption but also lead to excess energy consumption. *J Nutr*. 2010;140:612–7.
  50. Stevens G, Dias RH, Thomas KJ, Rivera JA, Carvalho N, Barquera S, Hill K, Ezzati M. Characterizing the Epidemiological Transition in Mexico: National and Subnational Burden of Diseases, Injuries, and Risk Factors. *PLoS Med*. 2008;5, e125. doi:10.1371/journal.pmed.0050163.
  51. Kolopaking R, Bardosono S, Fahmida U. Maternal self-efficacy in the home food environment: a qualitative study among low-income mothers of nutritionally at-risk children in an urban area of Jakarta, Indonesia. *J Nut Educ Behav*. 2011;43:180-188. doi:10.1016/j.jneb.2009.10.010.
  52. Mahmudiono T, Nindya TS, Andrias DR, Megatsari H, Rosenkranz RR. The effectiveness of nutrition education for overweight/obese mothers with

1  
2  
3 stunted children (NEO-MOM) in reducing the double burden of malnutrition  
4 in Indonesia: study protocol for a randomized controlled trial. *BMC Public*  
5 *Health*. 2016;16:1  
6

7 53. Pérez-Escamilla R. Can experience-based household food security scales  
8 help improve food security governance? *Glob Food Sec*. 2012;1:120-125.  
9  
10  
11  
12  
13  
14  
15  
16  
17  
18  
19  
20  
21  
22  
23  
24  
25  
26  
27  
28  
29  
30  
31  
32  
33  
34  
35  
36  
37  
38  
39  
40  
41  
42  
43  
44  
45  
46  
47  
48  
49  
50  
51  
52  
53  
54  
55  
56  
57  
58  
59  
60

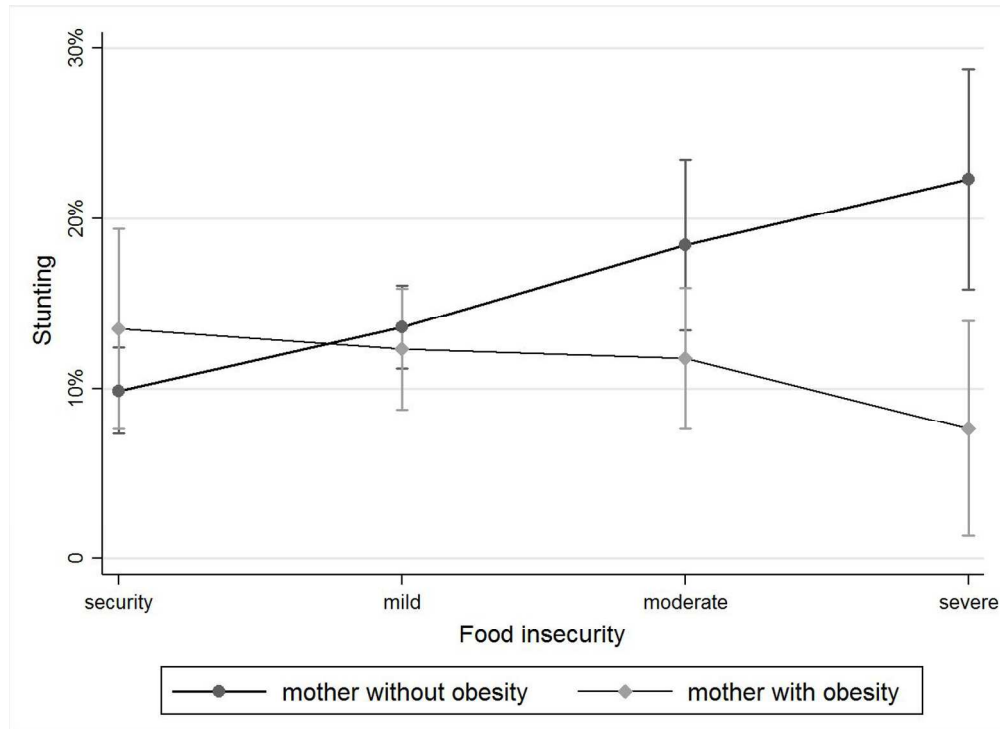

Figure 1. Effect of HFI-maternal obesity interaction on stunting among children <5 years

340x247mm (300 x 300 DPI)

ew only

1  
2  
3  
4  
5  
6  
7  
8 **Checklist of items that included in the manuscript: Food insecurity and the nutritional status of**  
9 **Mexican mother-child pairs**  
10

|                           | PAGE  |
|---------------------------|-------|
| Title and abstract        | 1-2   |
| Introduction              | 4-6   |
| Objectives                | 6     |
| Study design              | 6-7   |
| Setting                   | 7     |
| Participants              | 7     |
| Variables                 | 7     |
| Data sources/ measurement | 7     |
| Study size                | 7     |
| Quantitative variables    | 7-9   |
| Statistical methods       | 10    |
| Results                   | 10    |
| Participants              | 10    |
| Descriptive data          | 10-12 |
| Outcome data              | 13-15 |
| Main results              | 16-17 |
| Discussion                | 18    |
| Key results               | 18-23 |
| Limitations               | 21    |
| Interpretation            | 18-23 |

1  
2  
3 Generalizability 24  
4

5 **Other information:**  
6

7  
8 Funding 25  
9  
10  
11  
12  
13  
14  
15  
16  
17  
18  
19  
20  
21  
22  
23  
24  
25  
26  
27  
28  
29  
30  
31  
32  
33  
34  
35  
36  
37  
38  
39  
40  
41  
42  
43  
44  
45  
46  
47  
48  
49  
50  
51  
52  
53  
54  
55  
56  
57  
58  
59  
60

For peer review only
